# Supplementary material for: Trio Haploinsufficiency Causes Neurodevelopmental Disease–Associated Deficits
Source: PubMed Central journal article supplement — Cell Rep. Author manuscript; Available in PMC 2019 Mar 27. (PMC6436967; doi:10.1016/j.celrep.2019.02.022), 2019-03-05
Supplement: NIHMS1523263-supplement-1.pdf [file NIHMS1523263-supplement-1.pdf]

**Supplemental Information**

***Trio* Haploinsufficiency Causes**

**Neurodevelopmental Disease-Associated Deficits**

**Sara Marie Katrancha, Juliana E. Shaw, Amy Y. Zhao, Samuel A. Myers, Alexandra R. Cocco, Amanda T. Jeng, Minsheng Zhu, Christopher Pittenger, Charles A. Greer, Steven A. Carr, Xiao Xiao, and Anthony J. Koleske**

## Supplemental Information

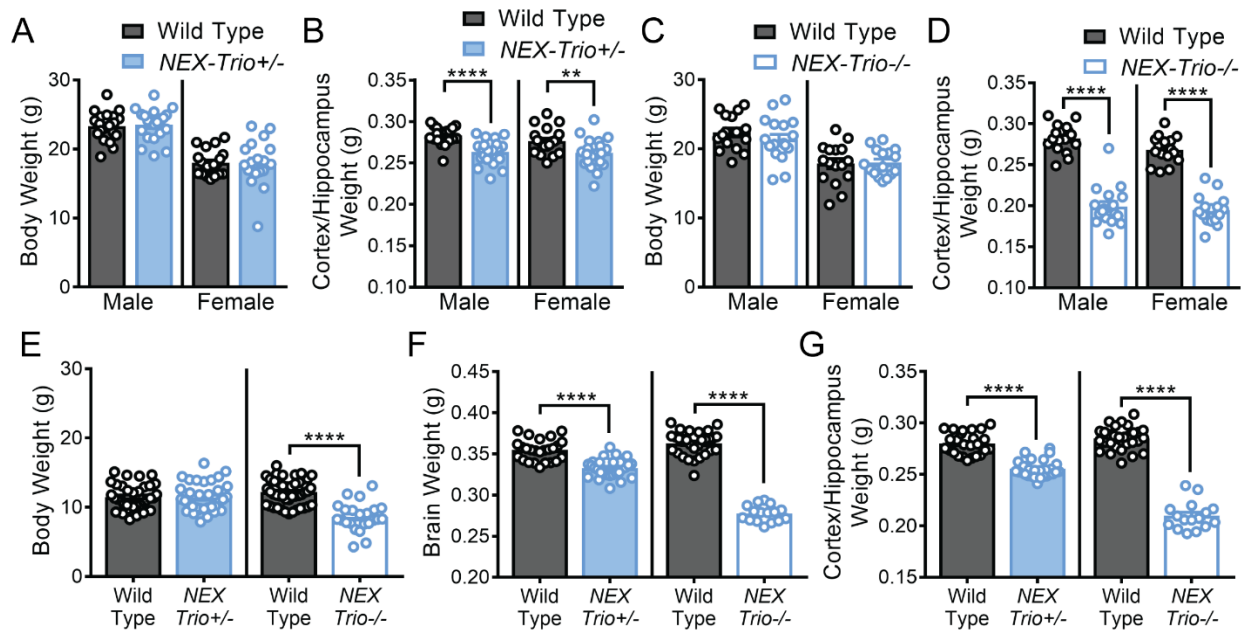

**Figure S1. *NEX-Trio*<sup>+/-</sup> and *NEX-Trio*<sup>-/-</sup> mice have similar body weights yet smaller brains than sex-matched littermates. Related to Figure 1.**

(A, C) Body weight does not differ significantly between *NEX-Trio*<sup>+/-</sup> (A) or *NEX-Trio*<sup>-/-</sup> (C) mice and WT mice of the same sex at P42.

(B, D) There was a significant reduction in the combined weight of the cortex and hippocampus between *NEX-Trio*<sup>+/-</sup> (B) or *NEX-Trio*<sup>-/-</sup> (D) mice and WT mice of the same sex at P42. RM 2-way ANOVA with post-hoc Bonf MC test identified differences (n = 16-21 mice per genotype).

(E) Body weight does not differ significantly between *NEX-Trio*<sup>+/-</sup> mice and WT mice at P21. Body weight was significantly decreased in *NEX-Trio*<sup>-/-</sup> mice relative to WT controls at P21.

(F, G) There was a significant reduction in the total brain weight (F) and combined weight of the cortex and hippocampus (G) between *NEX-Trio*<sup>+/-</sup> or *NEX-Trio*<sup>-/-</sup> mice and WT mice at P21. Unpaired t-tests identified differences between groups (n = 16-46 mice per genotype).

Data are represented as mean ± SEM. (\*\*p < 0.01, \*\*\*\*p < 0.0001)

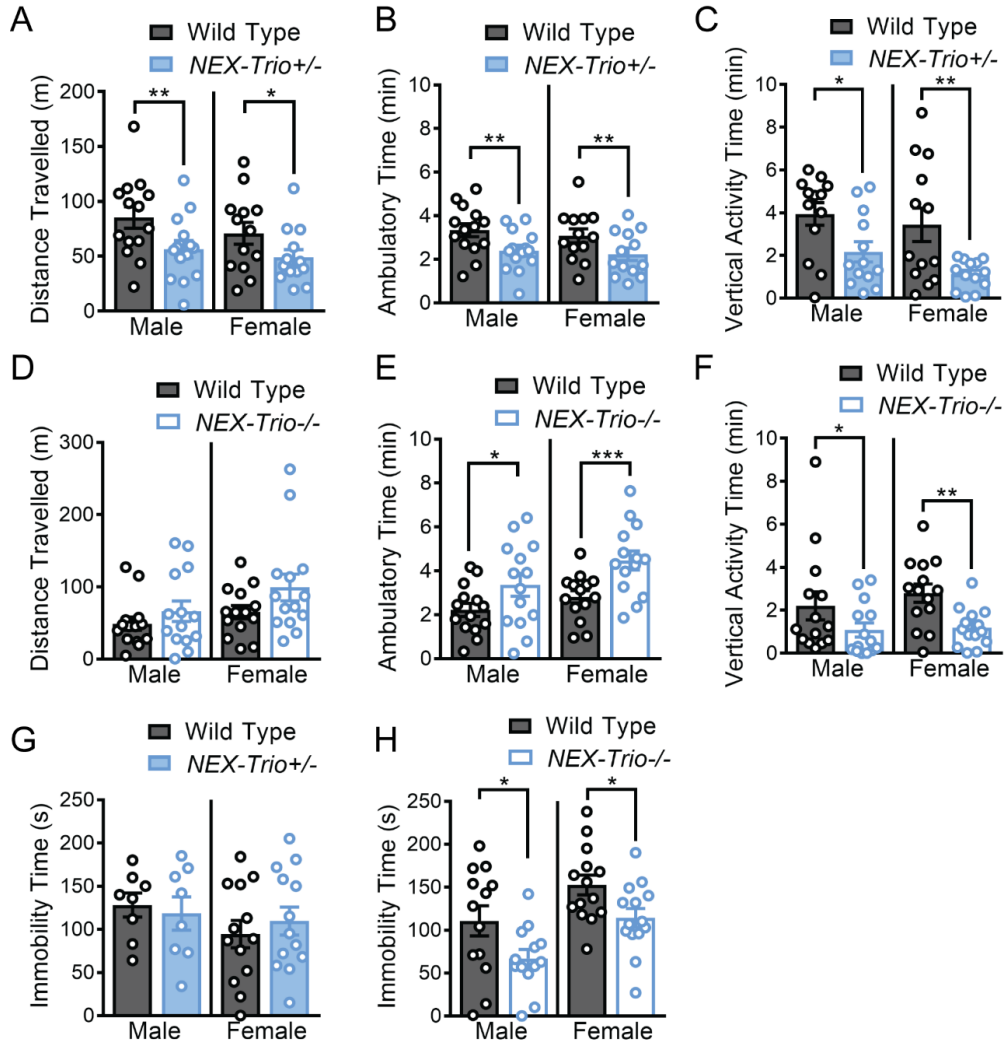

**Figure S2. *NEX-Trio*<sup>+/-</sup> mice show decreased locomotor activity in the open field test (OFT) and no behavioral despair.** Related to Figures 2 and 3.

(A, B, C) During the open field test (OFT), *NEX-Trio*<sup>+/-</sup> mice of both sexes traveled less distance overall (A), spent less time ambulating (B), and spent less time rearing (C) than WT littermates.

(D, E, F) Male and female *NEX-Trio*<sup>-/-</sup> mice showed no difference in distance travelled (D), spent more time ambulating (E), and spent less time rearing (F) relative to WT littermates in the OFT. RM 2-way ANOVA with post-hoc Bonf MC test identified differences (n = 13-14 littermate pairs).

(G) Male and female *NEX-Trio*<sup>+/-</sup> mice showed no change in immobility time during the forced swim test (FST) relative to WT littermates.

(H) Male and female *NEX-Trio*<sup>+/-</sup> mice spent significantly less time immobile during the FST relative to WT littermates. RM 2-way ANOVA with post-hoc Bonf MC test identified differences (n = 8-16 littermate pairs).

Data are represented as mean  $\pm$  SEM. (\*p<0.05, \*\*p<0.01, \*\*\*p<0.001)

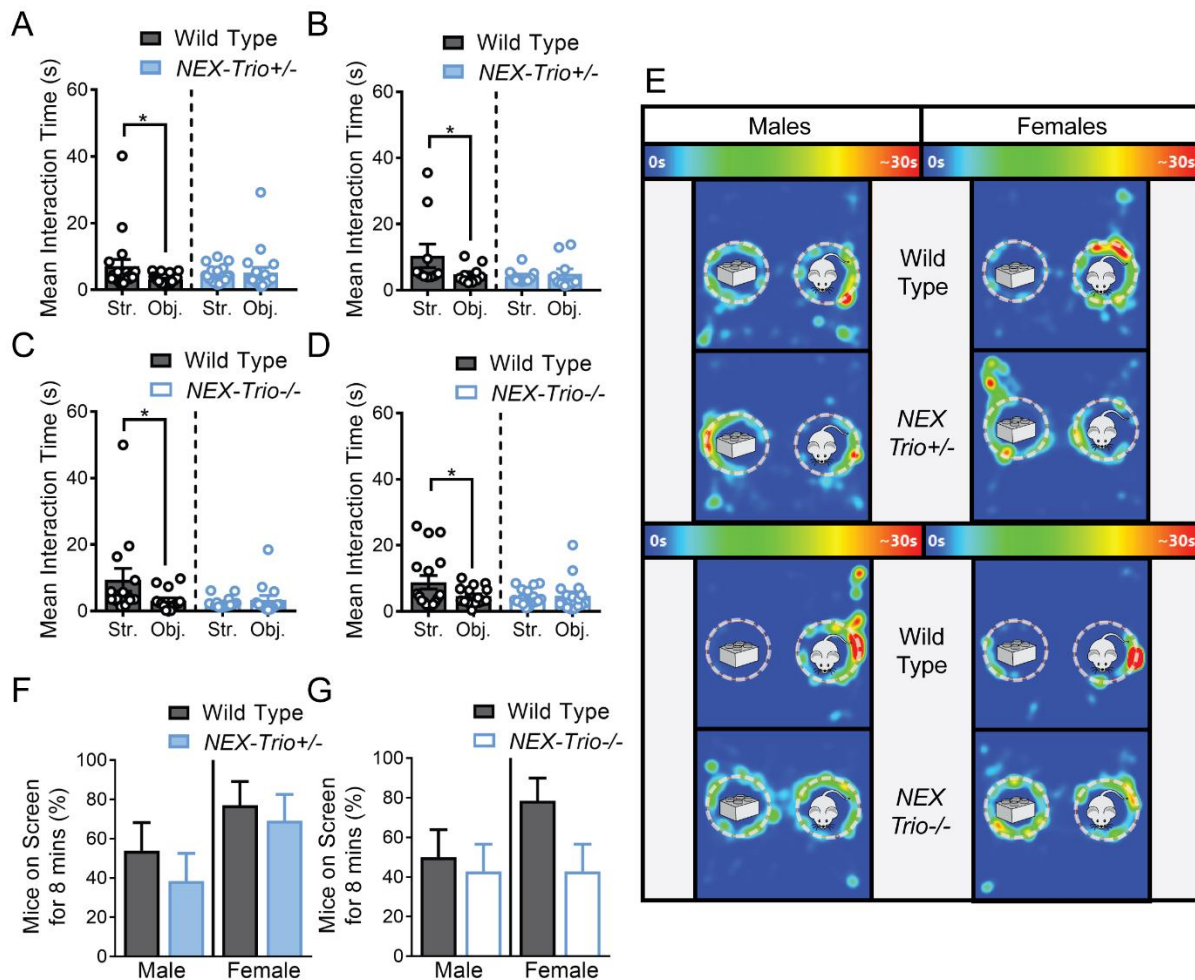

**Figure S3. *NEX-Trio+/-* and *NEX-Trio-/-* mice do not spend more time with the stranger mouse, relative to the object, per visit and show no change in muscle strength. Related to Figures 2 and 3.**

(A, B) Unlike WT mice, male (A) and female (B) *NEX-Trio+/-* mice spent equal time per visit interacting with the stranger mouse (Str.) and the object (Obj.) (mean interaction time).

(C, D) Unlike WT mice, male (C) and female (D) *NEX-Trio-/-* mice spent equal time per visit interacting with the stranger mouse (Str.) and the object (Obj.) (mean interaction time). RM 2-way ANOVA with post-hoc Bonf MC test identified differences (n = 10-18 littermate pairs).

(E) Representative heat maps show the amount of time (0 s in purple; >30 s in red) that the test mouse spent in each location (nonsocial zone, Duplo block; social zone, gray mouse).

(F, G) Male and female *NEX-Trio+/-* mice (F) and *NEX-Trio-/-* mice (G) successfully completed the inverted screen test at the same rate as WT littermates. N-1 Chi Square tests identified differences (n = 12-14 littermate pairs).

Data are represented as mean  $\pm$  SEM. (\* $p < 0.05$ )

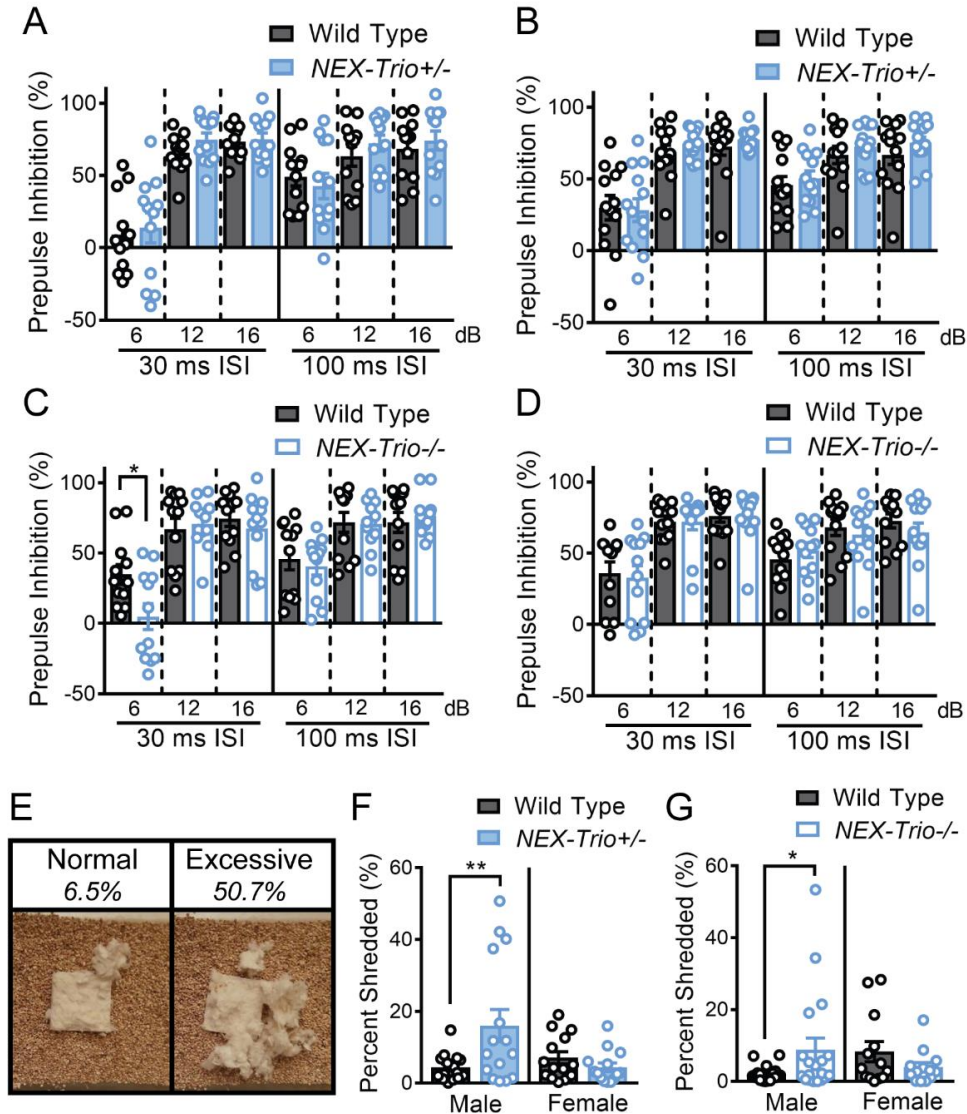

**Figure S4. Some male *NEX-Trio*<sup>+/+</sup> and *NEX-Trio*<sup>-/-</sup> mice have deficits in sensorimotor gating and nestlet shredding.** Related to Figures 2 and 3.

(A, B, C, D) Male *NEX-Trio*<sup>+/+</sup> (A), female *NEX-Trio*<sup>+/+</sup> (B), male *NEX-Trio*<sup>-/-</sup> (C), and female *NEX-Trio*<sup>-/-</sup> (D) mice displayed normal prepulse inhibition of acoustic startle with 30 or 100 ms interstimulus intervals (ISI) for all prepulse intensities (6, 12, and 16 dB), except for male *NEX-Trio*<sup>-/-</sup> mice (C) who showed significantly decreased inhibition at a 6 dB prepulse intensity with 30 ms ISI. RM 2-way ANOVA with post-hoc Bonf MC test identified differences (n = 12-13 littermate pairs).

(E) Representative images of nestlets showing both normal shredding (6.5%) and excessive shredding (50.7%).

(F, G) Male *NEX-Trio*<sup>+/+</sup> (F) and *NEX-Trio*<sup>-/-</sup> (G) mice showed a significant increase in the percentage of nestlet shredded over 30 minutes. Female *NEX-Trio*<sup>+/+</sup> (F) and *NEX-Trio*<sup>-/-</sup> (G) mice shredded the same percentage of nestlet as WT. RM 2-way ANOVA with post-hoc Bonf MC test identified differences (n = 13-19 littermate pairs).

Data are represented as mean ± SEM. (\*p<0.05, \*\*p<0.01)

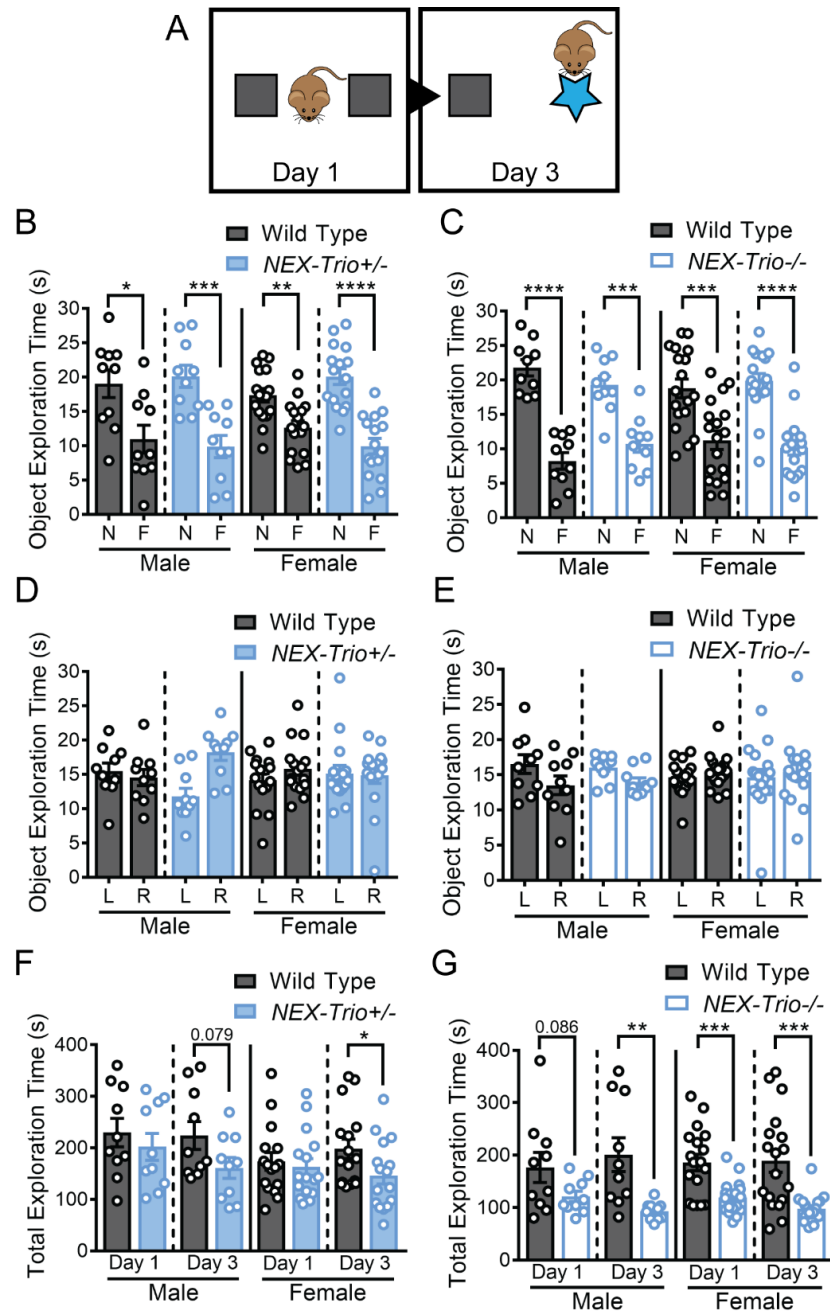

**Figure S5. *NEX-Trio+/-* and *NEX-Trio-/-* mice showed normal object recognition.** Related to Figures 2 and 3.

(A) The hippocampus-dependent novel object recognition task involved familiarizing the mice with an object on Day 1 and allowing the mouse to discriminate between the familiar object and a novel object on Day 3. WT mice preferred the novel object on Day 3.

(B, C) *NEX-Trio+/-* (B) and *NEX-Trio-/-* (C) mice of both sexes displayed normal discrimination between novel (N) and familiar (F) objects on Day 3.

(D, E) *NEX-Trio+/-* (D) and *NEX-Trio-/-* (E) mice of both sexes displayed normal object familiarization between objects on the left (L) and right (R) sides of the cage on Day 1.

(F, G) *NEX-Trio+/-* (F) and *NEX-Trio-/-* (G) mice accumulated 30 seconds of exploration time in significantly less overall time than WT littermates on day 3 and days 1/3, respectively. A linear regression with post-hoc Bonf MC test identified differences (n = 10-18 littermate pairs).

Data are represented as mean  $\pm$  SEM. (\*p<0.05, \*\*p<0.01, \*\*\*p<0.001, \*\*\*\*p<0.0001)



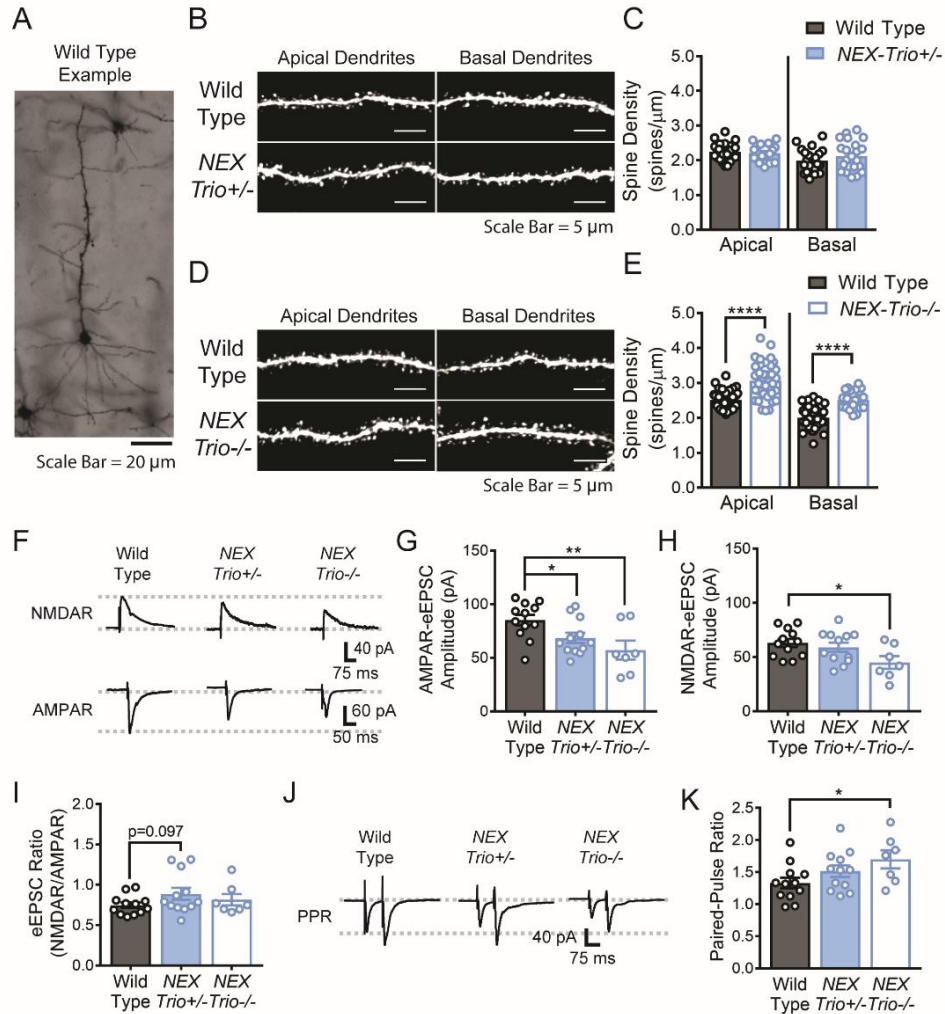

**Figure S6. *NEX-Trio*<sup>-/-</sup> mice have increased dendritic spine density and paired-pulse ratio in the hippocampus. Related to Figures 4, 5, and 6.**

(A) Representative Golgi-stained neuron used for dendritic arbor reconstructions. Scale bar = 20  $\mu$ m.

(B, D) Representative dendrite segments from the hippocampus (apical and basal dendrites) of *NEX-Trio*<sup>+/-</sup> (B) and *NEX-Trio*<sup>-/-</sup> (D) mice with WT controls. Scale bar = 5  $\mu$ m.

(C) Dendritic spine density was not significantly changed on the apical or basal dendrites of hippocampal CA1 neurons in *NEX-Trio*<sup>+/-</sup> mice relative to WT controls.

(E) Dendritic spine density was significantly increased on the apical and basal dendrites of hippocampal CA1 neurons in *NEX-Trio*<sup>-/-</sup> mice relative to WT controls. A linear regression with post-hoc Bonf MC test identified differences ( $n = 18-44$  dendrite segments from  $\geq 3$  mice per group).

(F) Representative traces of NMDAR- and AMPAR-eEPSCs from *NEX-Trio*<sup>+/-</sup>, *NEX-Trio*<sup>-/-</sup>, and WT hippocampal CA1 neurons.

(G) The amplitudes of AMPAR-eEPSCs were decreased in the hippocampus of *NEX-Trio*<sup>+/-</sup> and *NEX-Trio*<sup>-/-</sup> mice.

(H) The amplitudes of NMDAR-eEPSCs were only decreased in the hippocampus of *NEX-Trio*<sup>-/-</sup> mice.

(I) There is a trend toward increased NMDAR/AMPA eEPSC ratio in the hippocampus of *NEX-Trio*<sup>+/-</sup> mice ( $p = 0.097$ ) but no change in *NEX-Trio*<sup>-/-</sup> mice.

(J) Representative traces of eEPSCs are shown from *NEX-Trio*<sup>+/-</sup>, *NEX-Trio*<sup>-/-</sup>, and WT hippocampal CA1 neurons evoked by paired-pulse stimulation of hippocampal CA3 Schaffer collateral axons at 75 ms interstimulus intervals.

(K) An increase in the paired-pulse ratio was observed in *NEX-Trio*<sup>-/-</sup> mice, but no change was observed in *NEX-Trio*<sup>+/-</sup> mice. To consistently analyze *NEX-Trio*<sup>+/-</sup> and *NEX-Trio*<sup>-/-</sup> mice independently, unpaired t-tests identified differences between groups ( $n = 7-12$  neurons from  $\geq 3$  mice per group).

Data are represented as mean  $\pm$  SEM. (\* $p < 0.05$ , \*\* $p < 0.01$ , \*\*\*\* $p < 0.0001$ )

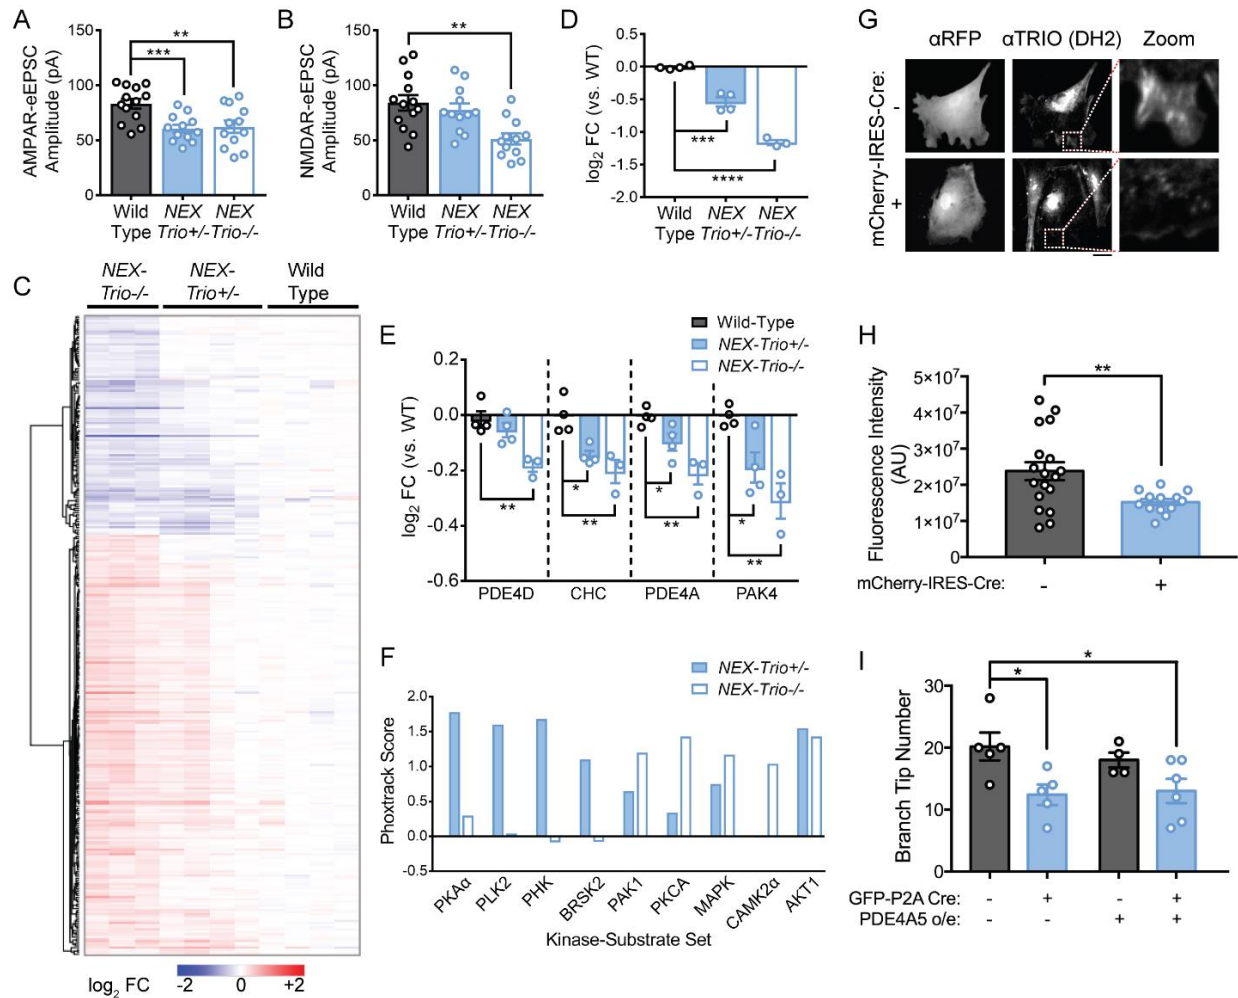

**Figure S7. Proteomic and phosphoproteomic analyses reveal that loss of *Trio* alters protein levels and phosphorylation levels in multiple molecular pathways.** Related to Figures 6 and 7.

(A) The amplitudes of AMPAR-eEPSCs were decreased in motor cortex of *NEX-Trio*<sup>+/-</sup> and *NEX-Trio*<sup>-/-</sup> mice.

(B) The amplitudes of NMDAR-eEPSCs were only decreased in motor cortex of *NEX-Trio*<sup>-/-</sup> mice. To consistently analyze *NEX-Trio*<sup>+/-</sup> and *NEX-Trio*<sup>-/-</sup> mice independently, unpaired t-tests identified differences between groups (n = 12-13 neurons from ≥3 mice per group).

(C) Hierarchically clustering of the 294 proteins identified to be differentially abundant (adj. p-value < 0.05) in the motor cortex between WT, *NEX-Trio*<sup>+/-</sup>, and *NEX-Trio*<sup>-/-</sup> mice. Individual replicates are shown.

(D) TRIO log<sub>2</sub> fold change (FC) levels were reduced in *NEX-Trio*<sup>+/-</sup> and *NEX-Trio*<sup>-/-</sup> mice by mass spectrometry.

(E) The log<sub>2</sub> fold change (FC) levels of PDE4D, CHC, PDE4A, and PAK4 were reduced in *NEX-Trio*<sup>+/-</sup> and/or *NEX-Trio*<sup>-/-</sup> mice compared to WT by mass spectrometry. To consistently analyze *NEX-Trio*<sup>+/-</sup> and *NEX-Trio*<sup>-/-</sup> mice independently, unpaired t-tests identified differences between groups (n = 3-4 mice per group).

(F) Phoxtracks enrichment score for all kinase-substrate pair sets that were enriched in *NEX-Trio*<sup>+/-</sup> and/or *NEX-Trio*<sup>-/-</sup> mice by quantitative phosphoproteomics (p-value < 0.05). Positive values indicate increased kinase activity.

(G) Representative immunofluorescence images of *Trio*<sup>flox/flox</sup> fibroblast cells with or without Cre vector. Cells were immunostained 6 days after transfection for RFP to visualize the outline of individually transfected cells and for TRIO using an anti-DH2 antibody to visualize changes in TRIO levels. Scale bar = 10 μm.

(H) Cre expression in *Trio*<sup>flox/flox</sup> fibroblast cells resulted in a 36% reduction in TRIO immunopositive signal 6 days after transfection; some of the remaining signal is likely cross-reactivity with Kalirin. Unpaired t-tests identified differences (n = 13-18 cells per group).

(I) *Cre-Trio*<sup>+/-</sup> cortical neurons showed a reduction in branch tip number 6 days after transfection; this deficit was not rescued by PDE4A5 overexpression. Unpaired t-tests identified differences (n = 5-6 cells per group).

Data are represented as mean ± SEM. (\*p<0.05, \*\*p<0.01, \*\*\*p<0.001, \*\*\*\*p<0.0001)
