# Supplementary material for: Trio Haploinsufficiency Causes Neurodevelopmental Disease–Associated Deficits
Source: PubMed Central journal article supplement — Cell Rep. Author manuscript; Available in PMC 2019 Mar 27. (PMC6436967; doi:10.1016/j.celrep.2019.02.022), 2019-03-05
Supplement: NIHMS1523263-supplement-2.pdf [file NIHMS1523263-supplement-2.pdf]

## *Trio* Haploinsufficiency Causes Neurodevelopmental Disease-Associated Deficits

### Graphical Abstract

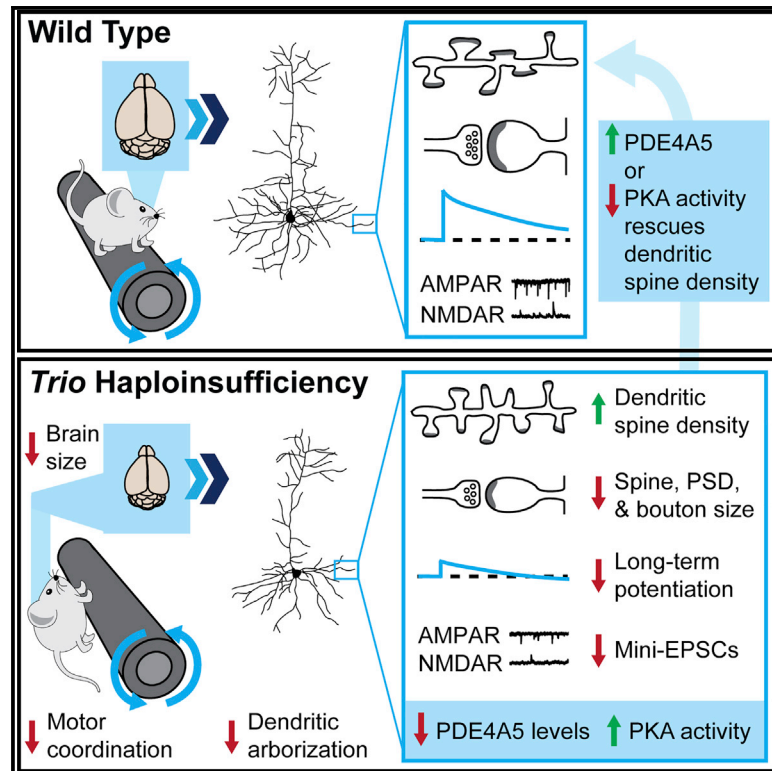

### Authors

Sara Marie Katrancha, Juliana E. Shaw, Amy Y. Zhao, ..., Steven A. Carr, Xiao Xiao, Anthony J. Koleske

### Correspondence

xiaoxiao@fudan.edu.cn (X.X.), anthony.koleske@yale.edu (A.J.K.)

### In Brief

Heterozygous *TRIO* mutations are associated with neurodevelopmental disorders. Katrancha et al. reveal that mouse *Trio* haploinsufficiency impairs sociability and motor coordination; decreases brain and neuron size; and impairs synaptic anatomy, function, and plasticity. Altering PDE4A5 levels and PKA signaling rescues some synaptic defects, suggesting an avenue to treat *TRIO*-related neurodevelopmental disorders.

### Highlights

- *Trio* loss increases anxiety and impairs social preference and motor coordination
- *Trio* loss reduces dendritic arborization but increases dendritic spine densities
- *Trio* loss impairs PDE4A5-PKA signaling, pre- and postsynaptic function, and LTP
- Altering PDE4A5 levels and PKA activity rescues *Trio*-related dendritic spine defects

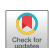

# *Trio* Haploinsufficiency Causes Neurodevelopmental Disease-Associated Deficits

Sara Marie Katrancha,<sup>1,2,3</sup> Juliana E. Shaw,<sup>1</sup> Amy Y. Zhao,<sup>1,2,3</sup> Samuel A. Myers,<sup>4</sup> Alexandra R. Cocco,<sup>4</sup> Amanda T. Jeng,<sup>2</sup> Minsheng Zhu,<sup>5</sup> Christopher Pittenger,<sup>2,6,7</sup> Charles A. Greer,<sup>2,3,8</sup> Steven A. Carr,<sup>4</sup> Xiao Xiao,<sup>9,10,\*</sup> and Anthony J. Koleske<sup>1,2,3,11,\*</sup>

<sup>1</sup>Department of Molecular Biophysics and Biochemistry, Yale University, New Haven, CT 06510, USA

<sup>2</sup>Interdepartmental Neuroscience Program, Yale University, New Haven, CT 06510, USA

<sup>3</sup>Department of Neuroscience, Yale University, New Haven, CT 06510, USA

<sup>4</sup>The Broad Institute of MIT and Harvard, Cambridge, MA 02142, USA

<sup>5</sup>Model Animal Research Center, Nanjing University, Nanjing 210061, China

<sup>6</sup>Department of Psychiatry, Yale University, New Haven, CT 06510, USA

<sup>7</sup>Child Study Center, Yale University, New Haven, CT 06510, USA

<sup>8</sup>Department of Neurosurgery, Yale University, New Haven, CT 06510, USA

<sup>9</sup>Institute of Science and Technology for Brain-Inspired Intelligence, Fudan University, Shanghai 200433, China

<sup>10</sup>Key Laboratory of Computational Neuroscience and Brain-Inspired Intelligence (Fudan University), Ministry of Education, Shanghai 200433, China

<sup>11</sup>Lead Contact

\*Correspondence: [xiaoxiao@fudan.edu.cn](mailto:xiaoxiao@fudan.edu.cn) (X.X.), [anthony.koleske@yale.edu](mailto:anthony.koleske@yale.edu) (A.J.K.)

<https://doi.org/10.1016/j.celrep.2019.02.022>

## SUMMARY

Heterozygous coding mutations in *TRIO* are associated with neurodevelopmental disorders, including autism, schizophrenia, bipolar disorder, and epilepsy, and impair *TRIO*'s biochemical activities. To model mutant alleles, we ablated one or both *Trio* alleles from excitatory neurons in the cortex and hippocampus of mice. *Trio* haploinsufficiency increases anxiety and impairs social preference and motor coordination. *Trio* loss reduces forebrain size and dendritic arborization but increases dendritic spine densities. Cortical synapses in *Trio* haploinsufficient mice are small, exhibit pre- and postsynaptic deficits, and cannot undergo long-term potentiation. Similar phenotypes are observed in *Trio* knockout mice. Overall, *Trio* haploinsufficiency causes severe disease-relevant deficits in behavior and neuronal structure and function. Interestingly, phosphodiesterase 4A5 (PDE4A5) levels are reduced and protein kinase A (PKA) signaling is increased when *TRIO* levels are reduced. Elevation of PDE4A5 and drug-based attenuation of PKA signaling rescue *Trio* haploinsufficiency-related dendritic spine defects, suggesting an avenue for therapeutic intervention for *TRIO*-related neurodevelopmental disorders.

## INTRODUCTION

Mutations and rare variants in the coding region of *TRIO* are enriched in individuals with neurodevelopmental disorders (NDDs), such as autism, schizophrenia, bipolar disorder, intellectual disability, and epilepsy (for review, see Katrancha et al., 2017 and Sadybekov et al., 2017). Analysis of genetic variation in

humans indicates that *TRIO* is highly intolerant to mutation (Genovese et al., 2016; Katrancha et al., 2017; Lek et al., 2016; Samocha et al., 2014), suggesting that mutations in *TRIO* confer risk for disease. *TRIO*, also known as triple functional domain protein, interfaces with cell surface receptors and small guanosine triphosphatases (GTPases) to regulate neuronal morphogenesis and synaptic function (Awasaki et al., 2000; Ba et al., 2016; Bateman et al., 2000; Bellanger et al., 2000; van Haren et al., 2014; Iyer et al., 2012; Newsome et al., 2000; Shivalkar and Giniger, 2012; Steven et al., 1998). *TRIO9S* and *TRIO9L*, the major isoforms expressed in the mammalian cortex, contain multiple catalytic and accessory domains, including two distinct guanine nucleotide exchange factor (GEF) domains (Bellanger et al., 1998; Blangy et al., 2000; Debant et al., 1996; Katrancha et al., 2017). Many disease-associated *de novo* mutations and rare variants impair *TRIO* GEF1 domain function but do not interfere with wild-type *TRIO* function (Katrancha et al., 2017; Sadybekov et al., 2017), suggesting that *TRIO* haploinsufficiency causes disease.

To study *Trio* haploinsufficiency in excitatory neurons of the cortex and hippocampus, we crossed mice bearing a conditional “floxed” *Trio* allele (Zong et al., 2015) with *NEX(Neurod6)-Cre* mice (Goebbels et al., 2006) to generate heterozygous *NEX-Cre, Trio<sup>+/flox</sup> (NEX-Trio+/-)* and homozygous *NEX-Cre, Trio<sup>flox/flox</sup> (NEX-Trio-/-)* mice. As modeled by disruption of one *Trio* allele, *Trio* haploinsufficiency causes behavioral deficits, including increased anxiety, impaired social preference, and impaired motor coordination. Similar and often more severe phenotypes are observed in *NEX-Trio-/-* mice. In a gene dosage-dependent manner, *Trio* loss reduces forebrain size and dendritic arborization but increases dendritic spine densities in the motor cortex. Cortical synapses in *Trio* haploinsufficient and knockout mice are also smaller than wild-type, exhibit pre- and postsynaptic deficits, and do not undergo long-term potentiation. Interestingly, phosphodiesterase 4A5 (PDE4A5) levels are reduced and protein kinase A (PKA) signaling is increased when *TRIO* levels are reduced or eliminated. Elevation of

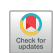

PDE4A5 and drug-based attenuation of PKA signaling rescue *Trio* haploinsufficiency-related dendritic spine defects. Overall, *Trio* haploinsufficiency, as observed in patients with NDDs, causes brain- and disease-relevant behavioral, anatomical, functional, and molecular deficits; some of these defects can be rescued by drug-based modulation, suggesting an avenue for therapeutic intervention for TRIO-related NDDs.

## RESULTS

### TRIO Levels Are Reduced in the Cortex and Hippocampus of *NEX-Trio*<sup>+/-</sup> and *NEX-Trio*<sup>-/-</sup> Mice

*NEX-Trio*<sup>+/-</sup> and *NEX-Trio*<sup>-/-</sup> mice were generated by crossing mice bearing a conditional *Trio* allele (Zong et al., 2015), in which exons 22–25 are flanked by LoxP sites, with *NEX(Neurod6)-Cre* mice (Goebbels et al., 2006). Cre-mediated recombination of *Trio* creates a premature stop codon at the start of the TRIO GEF1 domain, modeling the protein-truncating R1276X and F1538Intron mutants in schizophrenia and I1329Frameshift mutant in autism (Genovese et al., 2016; Kastranchara et al., 2017; De Rubeis et al., 2014). Unlike whole-brain *Trio* knockout mice (O'Brien et al., 2000; Peng et al., 2010), *NEX-Trio*<sup>+/-</sup> and *NEX-Trio*<sup>-/-</sup> mice survived into adulthood. At postnatal day 42 (P42), *NEX-Trio*<sup>+/-</sup> and *NEX-Trio*<sup>-/-</sup> mice had reduced TRIO levels in the cortex (46% and 85%, respectively) and hippocampus (51% and 74%, respectively) relative to wild-type (WT) littermates (Figures 1A–1D). As *NEX-Cre* is only expressed in excitatory neurons, the remaining TRIO likely reflects residual expression in interneurons or glia (Goebbels et al., 2006). TRIO levels were unaffected in the cerebellum, where *NEX-Cre* is not expressed (Figures 1A–1D).

### *NEX-Trio*<sup>+/-</sup> and *NEX-Trio*<sup>-/-</sup> Mice Have Smaller Brains Than WT Mice

Knockout of both *Trio* alleles in most cortical and hippocampal neurons with *EMX1-Cre* resulted in reduced body weight at P17 and reduced brain size at both P17 and P60 (Zong et al., 2015). We found that sex-matched WT, *NEX-Trio*<sup>+/-</sup>, and *NEX-Trio*<sup>-/-</sup> mice had similar body weights at P42 (Figures S1A and S1C). Both the total brain weight and the combined weight of the cortex and hippocampus were reduced in *NEX-Trio*<sup>+/-</sup> and *NEX-Trio*<sup>-/-</sup> mice by 4%–7% and 23%–29%, respectively, relative to WT (Figures 1E–1G, S1B, and S1D). The total brain weight and the combined weight of the cortex and hippocampus were also reduced at P21, suggesting a gross anatomical deficit, even during development (Figures S1F and S1G). Body weight at P21 was only reduced in *NEX-Trio*<sup>-/-</sup> mice (Figure S1E).

### *NEX-Trio*<sup>+/-</sup> and *NEX-Trio*<sup>-/-</sup> Mice Display Increased Anxiety-like Behavior and Impaired Social Preference

Mutations in *TRIO* are observed in NDD patients with wide-ranging behavioral deficits. As anxiety and depression are often comorbid with NDDs, we assessed anxiety-like behavior using the open field test (OFT) and elevated plus (E+) maze and behavioral despair using the forced swim test (FST). *NEX-Trio*<sup>+/-</sup> mice showed increased anxiety-like behavior in the OFT (Figures 2A and 2B) and E+ maze (Figures 2E and 2F) relative to WT littermates. *NEX-Trio*<sup>-/-</sup> mice had variable behavioral phenotypes that

were sexually dimorphic: only females spent more time in the center of the OFT, and only males showed reduced open arm time in the E+ maze (Figures 2C, 2D, 2G, and 2H). In the OFT, locomotor activity was decreased in *NEX-Trio*<sup>+/-</sup> mice (Figures S2A–S2C), although *NEX-Trio*<sup>-/-</sup> mice showed slight hyperactivity (Figures S2D–S2F). Behavioral despair was not observed in *NEX-Trio*<sup>+/-</sup> or *NEX-Trio*<sup>-/-</sup> mice in the FST (Figures S2G and S2H). Overall, anxiety-like behavior was increased in *NEX-Trio*<sup>+/-</sup> mice with no change in behavioral despair, although variable phenotypes were observed in *NEX-Trio*<sup>-/-</sup> mice.

As social dysfunction is associated with autism, schizophrenia, and other NDDs (Blatt, 2012; Tarbox et al., 2013), we tested how reduced TRIO levels impact social preference. WT mice interacted more with an unfamiliar “stranger” mouse relative to an inanimate object, exhibiting social preference (Figures 3A–3E and S3E). In contrast, *NEX-Trio*<sup>+/-</sup> and *NEX-Trio*<sup>-/-</sup> mice showed no preference for the stranger mouse relative to the object and reduced social preference relative to WT littermates (Figures 3A–3E), spending equivalent total visit time with the stranger mouse and object (Figures S3A–S3E). These findings reveal that reducing or eliminating TRIO function in excitatory forebrain neurons impairs social function.

We also assessed disease-specific behaviors. Individuals with schizophrenia show deficits in sensorimotor gating (Parwani et al., 2000), so we tested prepulse inhibition of acoustic startle (PPI). *NEX-Trio*<sup>+/-</sup> and *NEX-Trio*<sup>-/-</sup> mice displayed normal PPI with 30 ms or 100 ms interstimulus intervals (ISIs) for all prepulse intensities (6, 12, and 16 dB; Figures S4A–S4D), except male *NEX-Trio*<sup>-/-</sup> mice, which exhibited decreased PPI in the most challenging condition (6 dB prepulse intensity with 30 ms ISI). Individuals with autism display repetitive behaviors (Angoa-Pérez et al., 2013), so we assessed nestlet shredding. Male *NEX-Trio*<sup>+/-</sup> and *NEX-Trio*<sup>-/-</sup> mice exhibited increased nestlet shredding; this effect was driven by a subset of mice, suggesting incomplete penetrance (Figures S4E–S4G). Finally, in a test for recognition memory, *NEX-Trio*<sup>+/-</sup> and *NEX-Trio*<sup>-/-</sup> mice exhibited normal discrimination between novel and familiar objects and performed similarly to sex-matched WT littermates during object familiarization (Figures S5A–S5E), despite completing the task faster on one or both days (Figures S5F and S5G). Overall, these data suggest that partial and/or full loss of *Trio* expression does not affect novel object recognition but impacts sensorimotor gating and repetitive behaviors in some male mice.

In summary, *NEX-Trio*<sup>+/-</sup> and *NEX-Trio*<sup>-/-</sup> mice showed complex behavioral phenotypes that varied in both quality and severity of deficit. Of particular interest, *Trio* haploinsufficiency resulted in significant impairments in both social function and anxiety, consistent with the prevalence of these symptoms in NDD patients.

### *NEX-Trio*<sup>+/-</sup> and *NEX-Trio*<sup>-/-</sup> Mice Display Gene Dosage-Dependent Deficits in Motor Coordination

Motor abnormalities are early symptoms of autism and schizophrenia (Blatt, 2012; Walker et al., 1994). *NEX-Trio*<sup>+/-</sup> and *NEX-Trio*<sup>-/-</sup> mice showed a shorter latency to fall off an accelerating rotarod than WT littermates (Figures 3F and 3I). *NEX-Trio*<sup>+/-</sup> mice showed no deficit in motor learning, learning at a rate similar to WT littermates (40 s per trial; Figures 3G and 3H). In contrast,

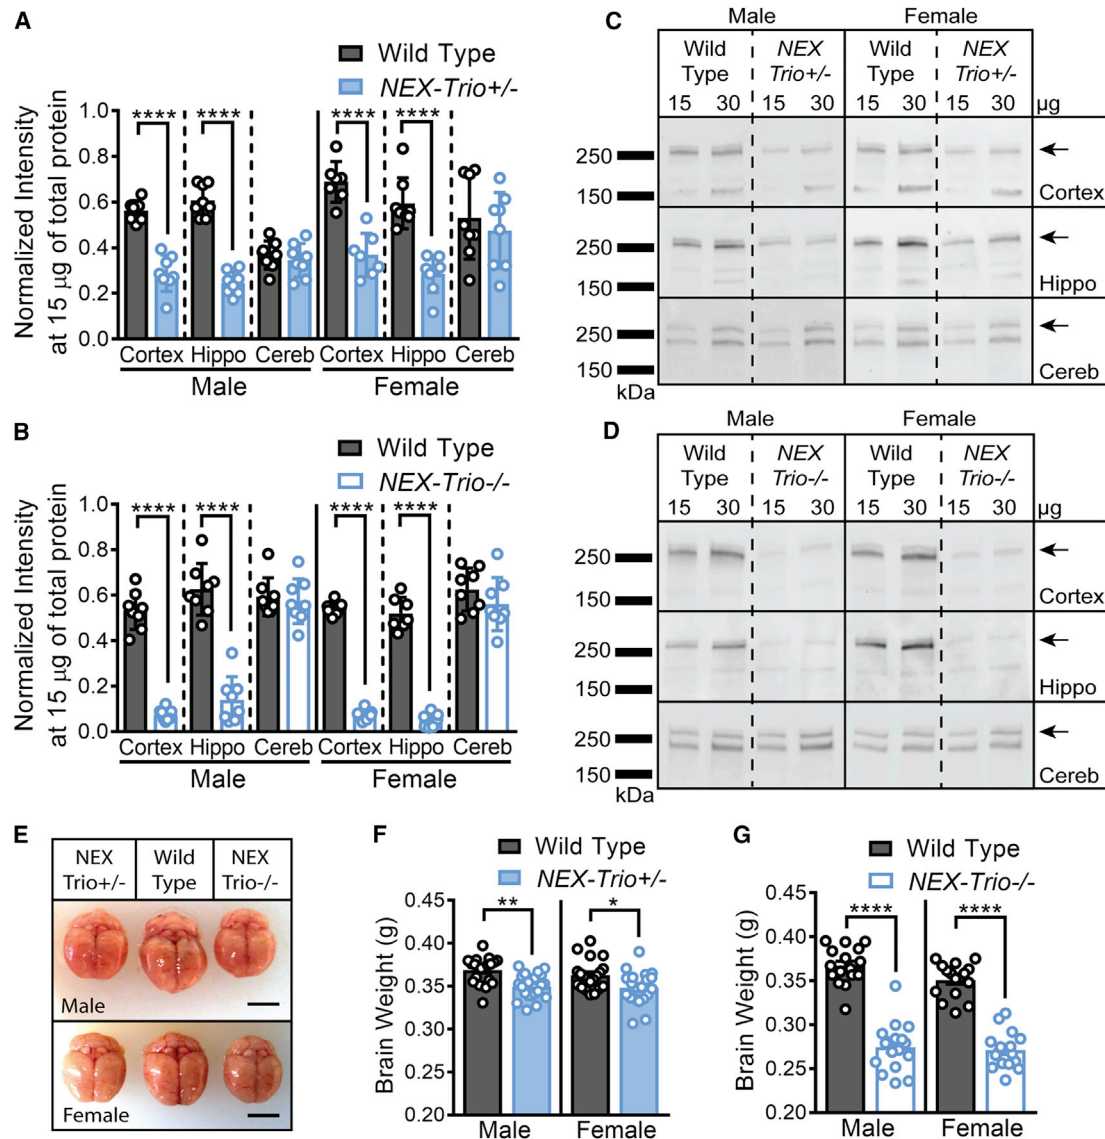

**Figure 1. *NEX-Trio+/-* and *NEX-Trio-/-* Mice Have Smaller Brains and Reduced TRIO Levels in the Cortex and Hippocampus at P42**

(A and B) TRIO levels were reduced in the cortex and hippocampus (Hippo) of *NEX-Trio+/-* (A) and *NEX-Trio-/-* (B) mice of both sexes at P42. No change was observed in the cerebellum (Cereb). Repeated-measures (RM) two-way ANOVA of genotype and brain region with post hoc Bonferroni multiple comparisons (Bonf MC) test identified differences for each group (n = 7–8 littermate pairs).

(C and D) Representative immunoblots are shown for male and female *NEX-Trio+/-* (C) and *NEX-Trio-/-* (D) mice in the cortex, hippocampus, and cerebellum. The overlapping 268- and 289-kDa bands, representing TRIO9S/L, were quantified (arrows). Other bands represent nonspecific antibody interactions or other isoforms (Katrancha et al., 2017).

(E–G) Total brain weight (E; scale bars represent 0.5 cm) was reduced in *NEX-Trio+/-* (F) and *NEX-Trio-/-* (G) mice compared to WT mice of the same sex at P42. RM two-way ANOVA with post hoc Bonf MC test identified differences (n = 16–21 mice per genotype).

See also Figure S1. Data are represented as mean ± SEM (\*p < 0.05; \*\*p < 0.01; \*\*\*\*p < 0.0001).

*NEX-Trio-/-* mice (14–18 s per trial) showed an impairment in motor learning rate compared to WT littermates (32 or 33 s per trial; Figures 3J and 3K). No confounding difference in muscle strength was observed using the Kondziela inverted screen test (Figures S3F and S3G). In summary, both *NEX-Trio+/-* and *NEX-Trio-/-* mice have deficits in motor coordination, and *NEX-Trio-/-* mice have additional deficits in motor learning.

***NEX-Trio+/-* and *NEX-Trio-/-* Mice Have Decreased Dendritic Arborization, Increased Dendritic Spine Density, and Smaller Synapses in Motor Cortex**

As *NEX-Cre*-mediated recombination is absent in the striatum and cerebellum (Goebbels et al., 2006), we assessed whether the motor deficits are associated with anatomical and functional changes in the motor cortex. We measured dendritic



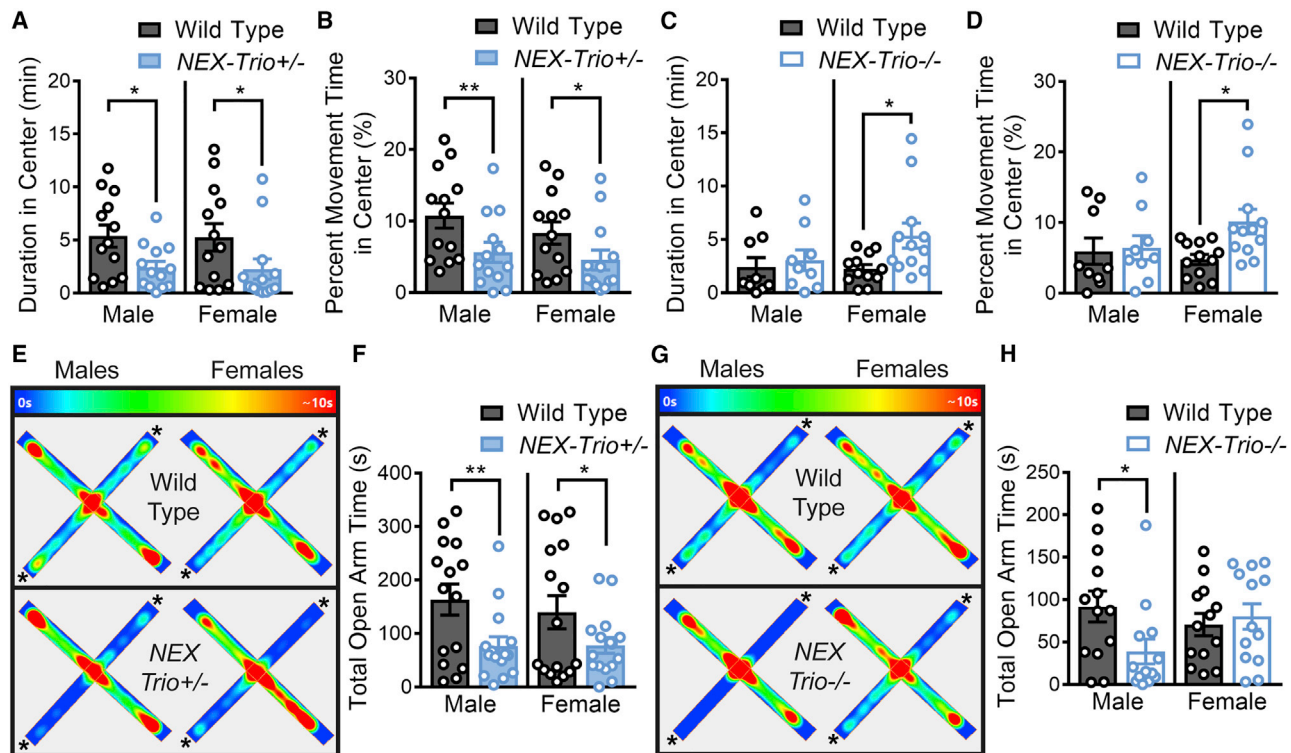

**Figure 2. *NEX-Trio*<sup>+/-</sup> Mice Show Increased Anxiety-like Behavior**

(A and B) *NEX-Trio*<sup>+/-</sup> mice of both sexes spent less time in the center of the open field at an absolute level (A) and when controlling for differences in motility (B) in the open field test (OFT).

(C and D) Male *NEX-Trio*<sup>-/-</sup> mice showed no change in anxiety, and female *NEX-Trio*<sup>-/-</sup> mice showed decreased anxiety relative to WT littermates at an absolute level (C) and when controlling for differences in motility (D) in the OFT.

(E and G) Representative heatmaps show the time (0 s in purple; >10 s in red) that the mouse spent in each location in the elevated plus maze for *NEX-Trio*<sup>+/-</sup> (E) and *NEX-Trio*<sup>-/-</sup> (G) mice compared to WT littermates. The asterisks (\*) indicate the open arms.

(F and H) Male and female *NEX-Trio*<sup>+/-</sup> (F) and male *NEX-Trio*<sup>-/-</sup> (H) mice spent less time in the open arms of the elevated plus maze than WT littermates. Female *NEX-Trio*<sup>-/-</sup> mice (H) showed no change in open arm time. RM two-way ANOVA with post hoc Bonf MC test identified differences (n = 8–16 littermate pairs).

See also Figures S2, S3, S4, and S5. Data are represented as mean ± SEM (\*p < 0.05; \*\*p < 0.01).

arborization in layer 5 pyramidal neurons (L5 PNs) in motor cortex (regions M1 and M2) of *NEX-Trio*<sup>+/-</sup>, *NEX-Trio*<sup>-/-</sup>, and WT mice (Figures 4A, 4E, and S6A). Sholl analysis revealed decreased dendritic arbor complexity in *NEX-Trio*<sup>+/-</sup> and *NEX-Trio*<sup>-/-</sup> mice (Figures 4B and 4F), due to reduced branch point numbers and total dendrite length (Figures 4C, 4D, 4G, and 4H). This phenotype was more pronounced in *NEX-Trio*<sup>-/-</sup> mice, indicating a gene dosage dependence.

We then assessed dendritic spine density in the motor cortex and hippocampus using the Thy1-GFP-M mouse line (Feng et al., 2000). *NEX-Trio*<sup>+/-</sup> and *NEX-Trio*<sup>-/-</sup> mice showed increased dendritic spine density on basal dendrites of L5 PNs in motor cortex (Figures 5A–5D), and *NEX-Trio*<sup>-/-</sup> mice showed increased dendritic spine density on apical and basal dendrites of hippocampal CA1 neurons (Figures S6D and S6E). No difference in spine density was observed in hippocampal CA1 neurons of *NEX-Trio*<sup>+/-</sup> mice (Figures S6B and S6C). Given the increased dendritic spine density in the motor cortex, we examined synaptic ultrastructure using electron microscopy (Figure 5E). Synapse density was significantly or suggestively

increased in *NEX-Trio*<sup>-/-</sup> and *NEX-Trio*<sup>+/-</sup> mice (Figures 5F and 5G). Dendritic spine area, presynaptic density (PSD) length, and presynaptic bouton area were all decreased in *NEX-Trio*<sup>+/-</sup> and *NEX-Trio*<sup>-/-</sup> mice (Figures 5H–5M). In summary, *Trio* haploinsufficiency and knockout decreased dendritic arbor length, increased dendritic spine density, and decreased synapse size in the motor cortex.

### Presynaptic Release Probability, Postsynaptic Currents, and Long-Term Potentiation Are Impaired in *NEX-Trio*<sup>+/-</sup> and *NEX-Trio*<sup>-/-</sup> Mice

L5 PNs in motor cortex exhibit task-related firing and plastic changes when mice run on an accelerating rotarod (Costa et al., 2004). To measure synaptic transmission, we recorded evoked excitatory postsynaptic currents (eEPSCs) and miniature excitatory postsynaptic currents (mEPSCs) in motor cortex L5 PNs. The NMDA receptor (NMDAR)/AMPA receptor (AMPA)-mediated eEPSC ratio was increased in *NEX-Trio*<sup>+/-</sup> mice (Figures 6A and 6B), due to decreased AMPAR-eEPSC amplitudes (Figures S7A and S7B), consistent with decreased PSD length

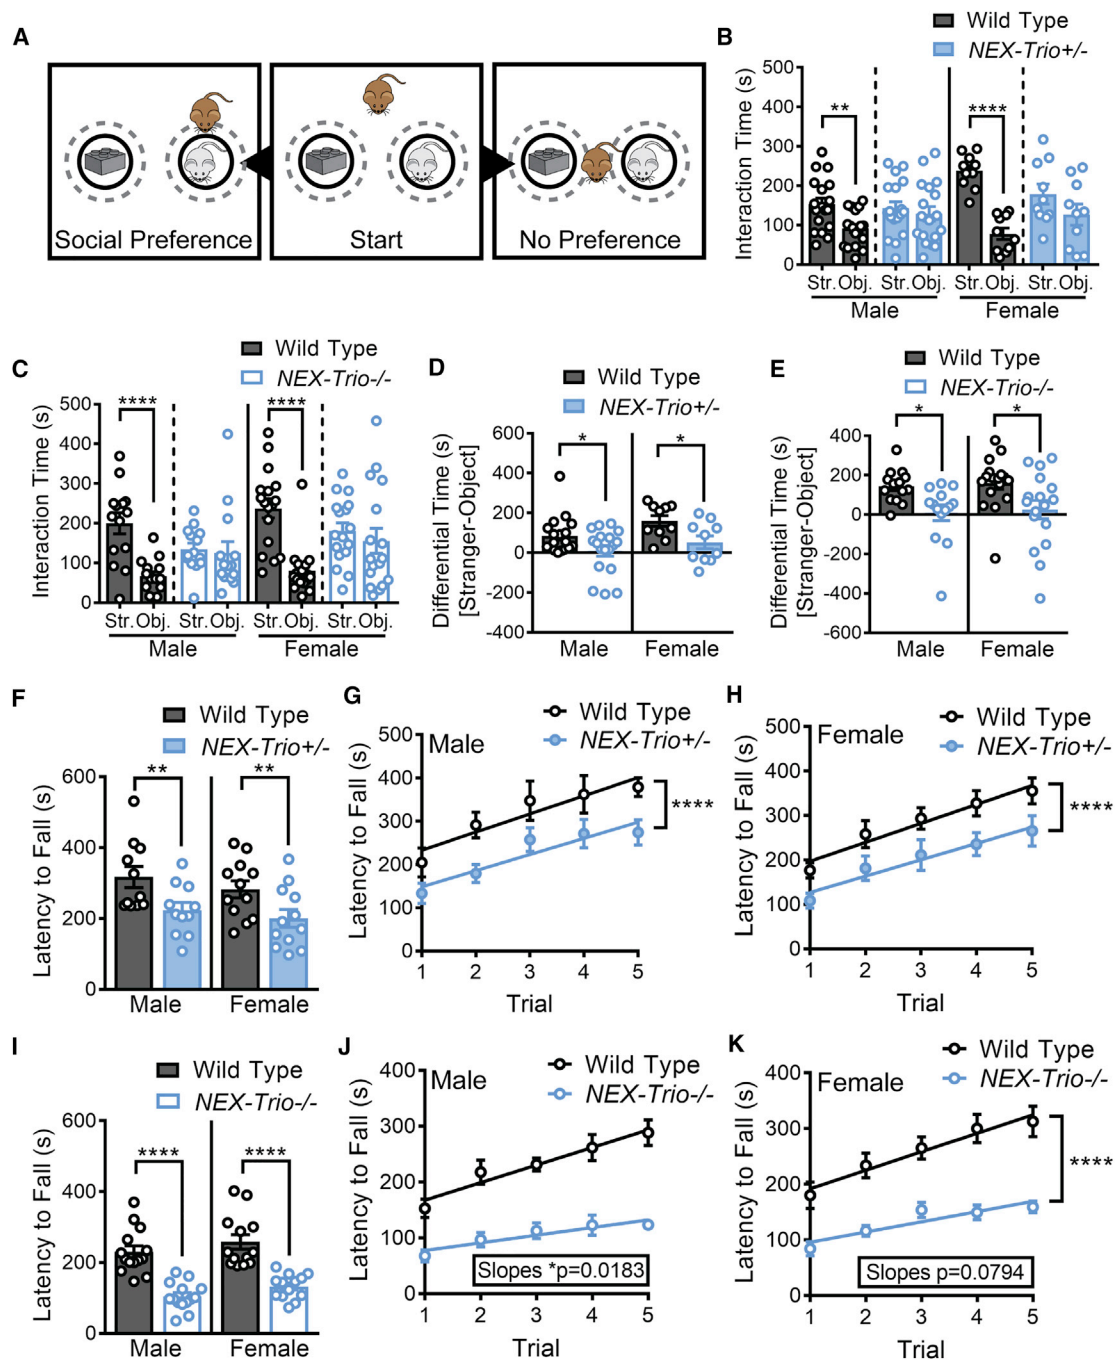

**Figure 3. *NEX-Trio+/-* and *NEX-Trio-/-* Mice Do Not Show a Preference for Social Interaction and Show Decreased Motor Coordination**

(A) (Middle) In the social preference task, a test mouse (brown) is placed in an open field with a male stranger mouse (gray) and an object (Duplo blocks, similar color and size as the stranger mouse). (Left) Test mice that display social preference spend more time with the stranger mouse relative to the object. (Right) Test mice that display no preference spend equal time with the stranger mouse and object. Target zones are designated by the gray dotted circles.

(B and C) *NEX-Trio+/-* (B) and *NEX-Trio-/-* (C) mice did not show preference for the stranger mouse (Str.) relative to the object (Obj.), whereas WT mice displayed normal social preference. A linear regression with post hoc Bonf MC test identified differences ( $n = 10-18$  littermate pairs).

(D and E) The difference in occupancy time between the social and nonsocial zones showed that *NEX-Trio+/-* (D) and *NEX-Trio-/-* (E) mice had reduced preference for the social zone compared to sex-matched WT littermates. RM two-way ANOVA with post hoc Bonf MC test identified differences ( $n = 10-18$  littermate pairs).

(F and I) *NEX-Trio+/-* (F) and *NEX-Trio-/-* (I) mice of both sexes had a shorter latency to fall off of the accelerating rotarod than WT littermates. RM two-way ANOVA with post hoc Bonf MC test identified differences ( $n = 11-14$  littermate pairs).

(legend continued on next page)

and spine area. In contrast, the NMDAR/AMPA eEPSC ratio was decreased in *NEX-Trio*<sup>-/-</sup> mice relative to WT (Figures 6A and 6B), with both NMDAR- and AMPAR-eEPSC amplitudes decreased (Figures S7A and S7B), a more severe phenotype.

Consistent with the observed eEPSC changes, the amplitudes of AMPAR-mEPSCs were significantly decreased in *NEX-Trio*<sup>+/-</sup> and *NEX-Trio*<sup>-/-</sup> mice (Figures 6C and 6E). There was a trend toward reduced amplitude of NMDAR-mEPSCs in *NEX-Trio*<sup>+/-</sup> mice ( $p = 0.0517$ ) and a significant reduction in *NEX-Trio*<sup>-/-</sup> mice (Figures 6C and 6E). The frequencies of AMPAR- and NMDAR-mEPSCs were also decreased in *NEX-Trio*<sup>+/-</sup> and *NEX-Trio*<sup>-/-</sup> mice (Figures 6D and 6E). *NEX-Trio*<sup>-/-</sup> mice showed an altered mEPSC decay time for NMDARs (Figures 6F and 6G). To assess presynaptic function, we measured paired-pulse ratio (PPR) in L5 PNs in motor cortex at five interstimulus intervals (35, 60, 100, 200, and 300 ms; Figures 6H and 6I). Increased PPR was observed in *NEX-Trio*<sup>+/-</sup> and *NEX-Trio*<sup>-/-</sup> mice (Figure 6I), suggesting a deficit in presynaptic release probability, which likely contributes to the decreased mEPSC frequency (Figure 6D).

Pre- and postsynaptic functions were also measured in the hippocampus. In *NEX-Trio*<sup>+/-</sup> mice, the NMDAR/AMPA eEPSC ratio trended toward an increase due to decreased AMPAR-eEPSC amplitudes (Figures S6F–S6I). In *NEX-Trio*<sup>-/-</sup> mice, the NMDAR/AMPA eEPSC ratio was not significantly changed (Figures S6F–S6I). Increased hippocampal PPR at a 75-ms interstimulus interval was only observed in *NEX-Trio*<sup>-/-</sup> mice (Figures S6J and S6K), suggesting that hippocampal neurons had lower sensitivity to *Trio* disruption relative to cortical neurons.

Finally, to assess synaptic plasticity in the motor cortex, we analyzed long-term potentiation (LTP), via theta burst stimulation (TBS), in *NEX-Trio*<sup>+/-</sup> and *NEX-Trio*<sup>-/-</sup> mice, which showed a lack of induction and maintenance of TBS-LTP relative to WT (Figure 6J). Our data suggest that *Trio* haploinsufficiency and knockout impair both pre- and postsynaptic function and synaptic plasticity.

### PDE4A5 Levels Are Reduced in a *Trio* Gene Dosage-Dependent Manner, and Restoration of PDE4A5 Rescues *Trio*-Related Increases in Dendritic Spine Density

We used mass-spectrometry-based proteomic and phosphoproteomic analyses of the motor cortex to identify proteins whose levels or function were altered in *NEX-Trio*<sup>+/-</sup> and *NEX-Trio*<sup>-/-</sup> mice. Of the 8,379 proteins quantified, 193 and 101 were significantly up- or downregulated, respectively, with *Trio* loss (Figure S7C). Proteome profiling confirmed TRIO depletion in *NEX-Trio*<sup>+/-</sup> and *NEX-Trio*<sup>-/-</sup> mice (Figure S7D), along with decreases in other NDD-associated proteins: phosphodiesterase (PDE) 4D, clathrin heavy chain (CHC), PDE4A, and P21 or RAC1 activated kinase 4 (PAK4) (Figures 7A and S7E). Quantita-

tive immunoblotting corroborated these findings in *NEX-Trio*<sup>-/-</sup> mice as follows: -11% PDE4D, -8% CHC, -28% PDE4A, and -25% PAK4 (Figures 7B and 7C). Of interest, PDE4A isoform 5 (PDE4A5) was reduced in a *Trio* dosage-dependent manner, exhibiting 21% and 44% reductions in *NEX-Trio*<sup>+/-</sup> and *NEX-Trio*<sup>-/-</sup> mice, respectively (Figures 7D and 7E). As PDE4A5 is an attenuator of PKA signaling, we queried the phosphoproteomic data for enrichment or depletion of known kinase-substrate pairs (Weidner et al., 2014). Nine pairs were significantly increased in either the *NEX-Trio*<sup>+/-</sup> or *NEX-Trio*<sup>-/-</sup> samples, with PKA and its substrates most significantly changed (Figure S7F; Weidner et al., 2014). PKA substrate phosphopeptide levels were consistently increased with relatively little change in protein levels, and activity-inducing phosphorylation of the catalytic subunit of PKA (phosphorylation site T198) was increased in *NEX-Trio*<sup>+/-</sup> and *NEX-Trio*<sup>-/-</sup> mice (Figure 7F). Overall, *Trio* loss downregulates PDE4A5 protein levels, increases PKA signaling, and increases phosphorylation of PKA substrates in the motor cortex.

To assess the contribution of PDE4A5 to *Trio*-related phenotypes, we modeled *Trio* haploinsufficiency in cultured cortical neurons. First, we verified that Cre expression yielded significant TRIO loss in *Trio*<sup>flox/flox</sup> mouse fibroblasts (Figures S7G and S7H). Then, we transfected *Trio*<sup>+flox</sup> neurons with GFP-P2A-Cre to inactivate one *Trio* allele (*Cre-Trio*<sup>+/-</sup>) and compared this to GFP-transfected *Trio*<sup>+flox</sup> neurons (WT). *Cre-Trio*<sup>+/-</sup> neurons showed increased spine density and decreased branch tip number (Figures 7G, 7H, and S7I), mimicking the phenotypes observed in *NEX-Trio*<sup>+/-</sup> mouse brain (Figures 4 and 5). PDE4A5 overexpression rescued the increased spine density in *Cre-Trio*<sup>+/-</sup> neurons, restoring them to WT levels, but did not impact WT spine density (Figures 7G and 7H). PDE4A5 overexpression did not rescue branching deficits in *Cre-Trio*<sup>+/-</sup> neurons, indicating that other mechanisms support dendrite branches (Figure S7I). As PDE4A5 levels are reduced and PKA signaling is elevated in *NEX-Trio*<sup>+/-</sup> mouse cortex (Figures 7E and 7F), we treated *Cre-Trio*<sup>+/-</sup> neurons with Rp-cAMPS, a competitive PKA antagonist (Taylor et al., 1999). Rp-cAMPS treatment rescued the increased dendritic spine density in *Cre-Trio*<sup>+/-</sup> neurons (Figures 7G and 7H). These findings suggest that drug-based modulation of the TRIO/PDE4A5-PKA pathway may be a promising treatment for NDDs.

## DISCUSSION

NDDs are associated with *de novo* mutations and rare variants in *TRIO*'s coding region, many of which impair TRIO GEF1 domain function (Katrancha et al., 2017; Sadybekov et al., 2017). These disorders are also associated with impaired structure and function of excitatory forebrain neurons (Glantz and Lewis, 2000; Goebbels et al., 2006; Hutsler and Zhang, 2010; Konopaske

(G and H) Male (G) and female (H) *NEX-Trio*<sup>+/-</sup> mice had a shorter latency to fall off of the accelerating rotarod than WT littermates in every trial (difference in intercepts), but all groups learned at a rate of 40 s per trial (no difference in slopes).

(J and K) Male (J) and female (K) *NEX-Trio*<sup>-/-</sup> mice showed impaired motor learning (significant or suggestive difference in slopes) compared to WT littermates. Male and female WT mice learned at a rate of 32 and 33 s per trial, respectively; male and female *NEX-Trio*<sup>-/-</sup> mice learned at a rate of 14 and 18 s per trial, respectively. Linear regressions with post hoc test for differences between slopes and changes in intercepts identified differences ( $n = 11$ –14 littermate pairs). See also Figures S2, S3, S4, and S5. Data are represented as mean  $\pm$  SEM (\* $p < 0.05$ ; \*\* $p < 0.01$ ; \*\*\*\* $p < 0.0001$ ).



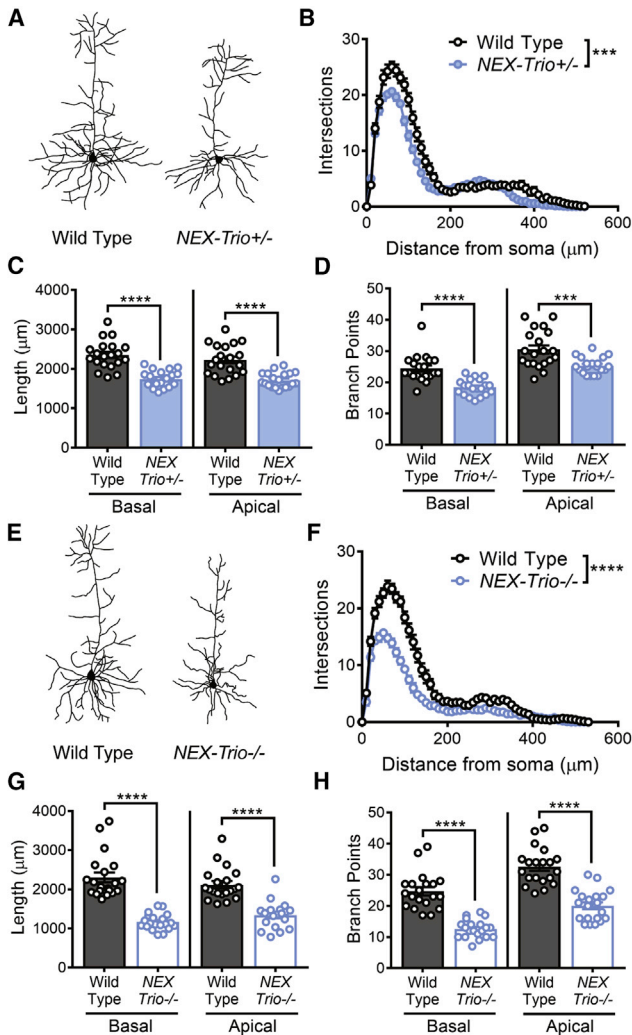

**Figure 4. Dendritic Arborization Is Reduced in the Motor Cortex of *NEX-Trio*<sup>+/-</sup> and *NEX-Trio*<sup>-/-</sup> Mice**

(A and E) Representative dendritic arbor reconstructions are shown for layer 5 pyramidal neurons (L5 PN) in *NEX-Trio*<sup>+/-</sup> (A) and *NEX-Trio*<sup>-/-</sup> (E) mice. (B and F) Sholl analysis revealed decreased dendritic arborization on L5 PN in *NEX-Trio*<sup>+/-</sup> (B) and *NEX-Trio*<sup>-/-</sup> (F) mice relative to WT controls; the phenotype was more severe in *NEX-Trio*<sup>-/-</sup> mice (F). RM two-way ANOVA with post hoc Bonf MC test identified differences (n = 20 neurons from 4 mice per genotype). (C and G) Apical and basal dendrite length were reduced on L5 PN in *NEX-Trio*<sup>+/-</sup> (C) and *NEX-Trio*<sup>-/-</sup> (G) mice relative to WT controls. (D and H) The numbers of apical and basal branch points were reduced on L5 PN in *NEX-Trio*<sup>+/-</sup> (D) and *NEX-Trio*<sup>-/-</sup> (H) mice relative to WT controls. Unpaired t tests identified differences between groups (n = 20 neurons from 4 mice per genotype). See also Figure S6. Data are represented as mean ± SEM (\*\*\*p < 0.001; \*\*\*\*p < 0.0001).

et al., 2014). As only one allele is typically damaged in these patients, we hypothesized that the disease-associated mutations result in haploinsufficiency of *TRIO*, impairing the function of excitatory forebrain neurons. We discovered that *NEX-Trio*<sup>+/-</sup> mice have smaller brains and exhibit profound deficits in

dendrite and synapse structure and function; synaptic transmission and plasticity; and motor, social, and anxiety-like behaviors, all hallmarks of NDDs. Similar and often more severe phenotypes are observed in *NEX-Trio*<sup>-/-</sup> mice. Overall, this study reveals that *Trio* haploinsufficiency, as observed in patients with NDDs, causes disease-relevant deficits, suggesting that upregulating *TRIO* function may be a promising treatment for NDDs.

### ***Trio* Disruption Causes NDD-Associated Deficits in Cortical Function and Anatomy**

Motor abnormalities are among the earliest symptoms in autism and schizophrenia (Blatt, 2012; Walker et al., 1994). Our data suggest that *TRIO* plays a role in motor function, as reduced *Trio* dosage causes motor coordination deficits. Furthermore, we observed altered dendritic spine density, dendritic arborization, and forebrain size in *NEX-Trio*<sup>+/-</sup> mice. These phenotypes are consistent with the observations of increased cortical dendritic spine density in autism (Hutsler and Zhang, 2010) and in primary neuronal culture following overexpression of the intellectual disability-associated *TRIO* D1368V mutation (Sadybekov et al., 2017), decreased dendritic arborization in various NDDs (Kulkarni and Firestein, 2012), and decreased cortical thickness in schizophrenia (van Erp et al., 2018). Our data suggest that *TRIO* loss may play an important role in NDD-associated deficits in motor coordination and cortical anatomy.

### ***TRIO* Promotes PDE4A5-PKA Signaling to Regulate Dendritic Spine Density**

Our study links *TRIO* to PDE4A and downstream PKA-cyclic AMP (cAMP) signaling in a NDD-relevant pathway. We provide evidence of a functional interaction between *TRIO* and PDE4A5 and their joint impact on dendritic spine density. Our data are supported by previous evidence that both *TRIO* and PDE4A bind DISC1 (disrupted in schizophrenia 1), which is believed to anchor these proteins within the dendritic spine (Chen et al., 2011; Murdoch et al., 2007). Our data suggest that *TRIO* and PDE4A5 interact with PKA and cAMP signaling to control dendritic spine density in a shared molecular pathway, a possible therapeutic target for NDDs.

### ***Trio* Loss Impairs Both Pre- and Postsynaptic Function in Mammals**

Previous reports suggest that *Trio* knockdown or reduced *TRIO* function impairs AMPAR function in the hippocampus (Ba et al., 2016; Herring and Nicoll, 2016; Sadybekov et al., 2017). We further show that *Trio* disruption impairs AMPAR function in both the motor cortex and hippocampus, even if only one allele is damaged, as in patients with NDDs. We also reveal that reduced *TRIO* function disrupts normal presynaptic release and bouton area in mammals, possibly restricting glutamate availability in the motor cortex. Similarly, *trio* mutant *Drosophila* exhibit impaired axonal formation and pathfinding as well as decreased boutons per area at the neuromuscular junction (Awasaki et al., 2000; Ball et al., 2010; Bateman et al., 2000; Hakeda-Suzuki et al., 2002; Miller et al., 2013; Newsome et al., 2000; Pawson et al., 2008). Furthermore, LTP in the motor cortex may mediate motor function and skill learning (Li et al., 2017; Rioult-Pedotti et al., 2000; Yu and Zuo, 2011). Our observation



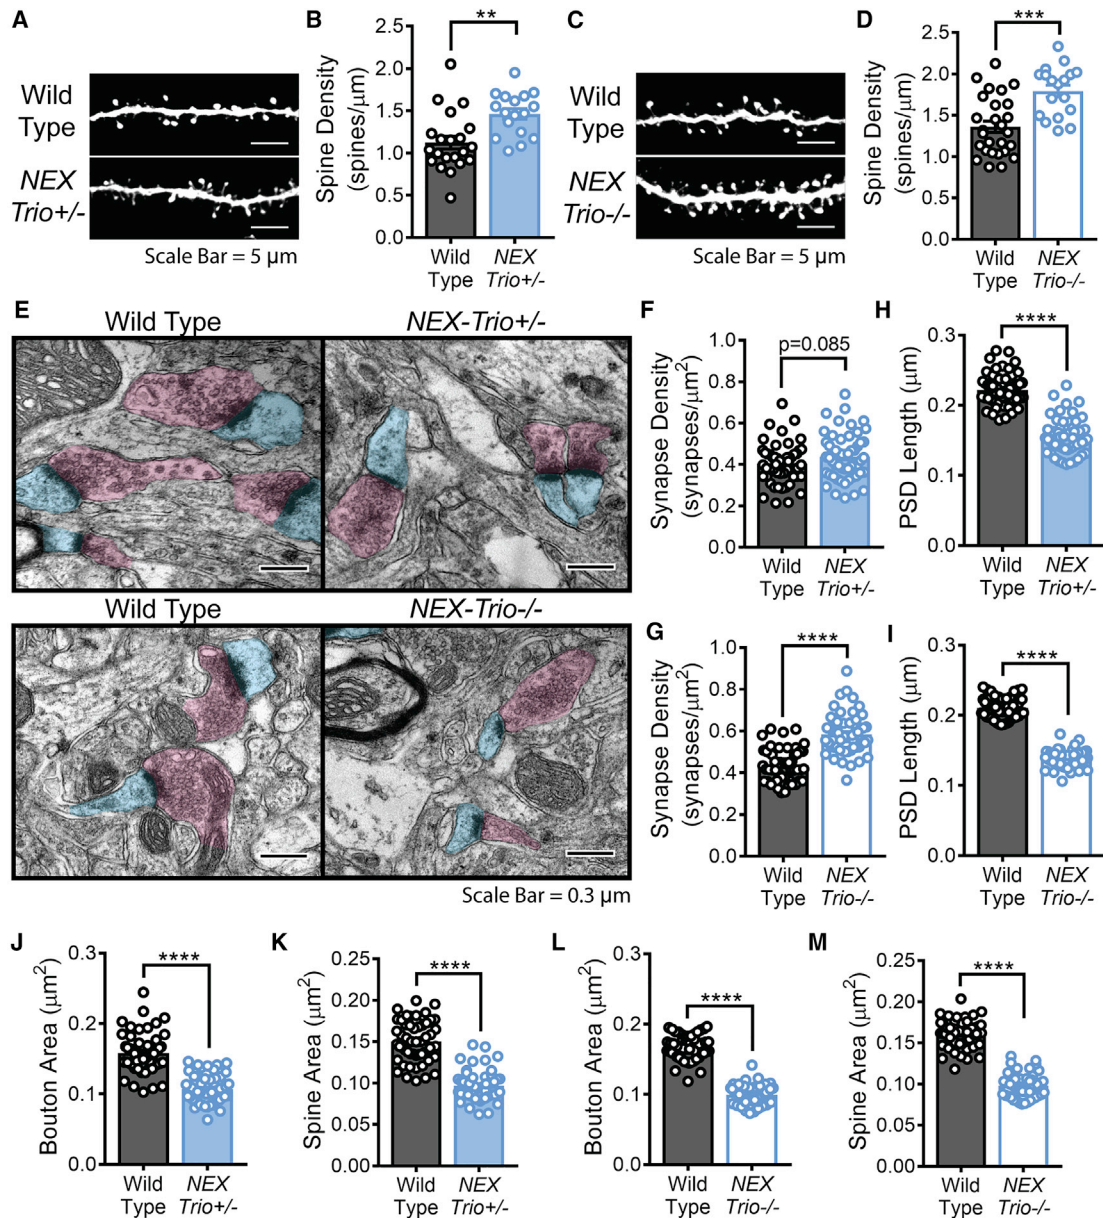

**Figure 5. *NEX-Trio+/-* and *NEX-Trio-/-* Mice Have Increased Dendritic Spine Density and Smaller Synapses in the Motor Cortex**

(A and C) Representative basal dendrite segments from L5 PN in the motor cortex of *NEX-Trio+/-* (A) and *NEX-Trio-/-* (C) mice with WT controls. Scale bars represent 5  $\mu\text{m}$ .

(B and D) Dendritic spine density was increased on L5 PN in the motor cortex of *NEX-Trio+/-* (B) and *NEX-Trio-/-* (D) mice relative to WT controls. A linear regression with post hoc Bonf MC test identified differences ( $n = 17\text{--}27$  dendrite segments from  $\geq 3$  mice per group).

(E) Representative electron micrographs from L5 motor cortex of *NEX-Trio+/-*, *NEX-Trio-/-*, and WT mice. Scale bars represent 0.3  $\mu\text{m}$ .

(F and G) Cortical synapse density (synapses per  $\mu\text{m}^2$ ) trended ( $p = 0.085$ ) toward an increase in *NEX-Trio+/-* mice (F) and was increased in *NEX-Trio-/-* mice (G).

(H and I) PSD length was decreased in L5 motor cortex of both *NEX-Trio+/-* (H) and *NEX-Trio-/-* (I) mice.

(J and L) Presynaptic bouton area was decreased in L5 motor cortex of both *NEX-Trio+/-* (J) and *NEX-Trio-/-* (L) mice.

(K and M) Dendritic spine area was decreased in both *NEX-Trio+/-* (K) and *NEX-Trio-/-* (M) mice.

For (F)–(M), a linear regression with post hoc Bonf MC test identified differences ( $n = 54$  fields of view [ $\sim 55 \mu\text{m}^2$  each] from 3 mice per group).

See also Figure S6. Data are represented as mean  $\pm$  SEM (\*\* $p < 0.01$ ; \*\*\* $p < 0.001$ ; \*\*\*\* $p < 0.0001$ ).

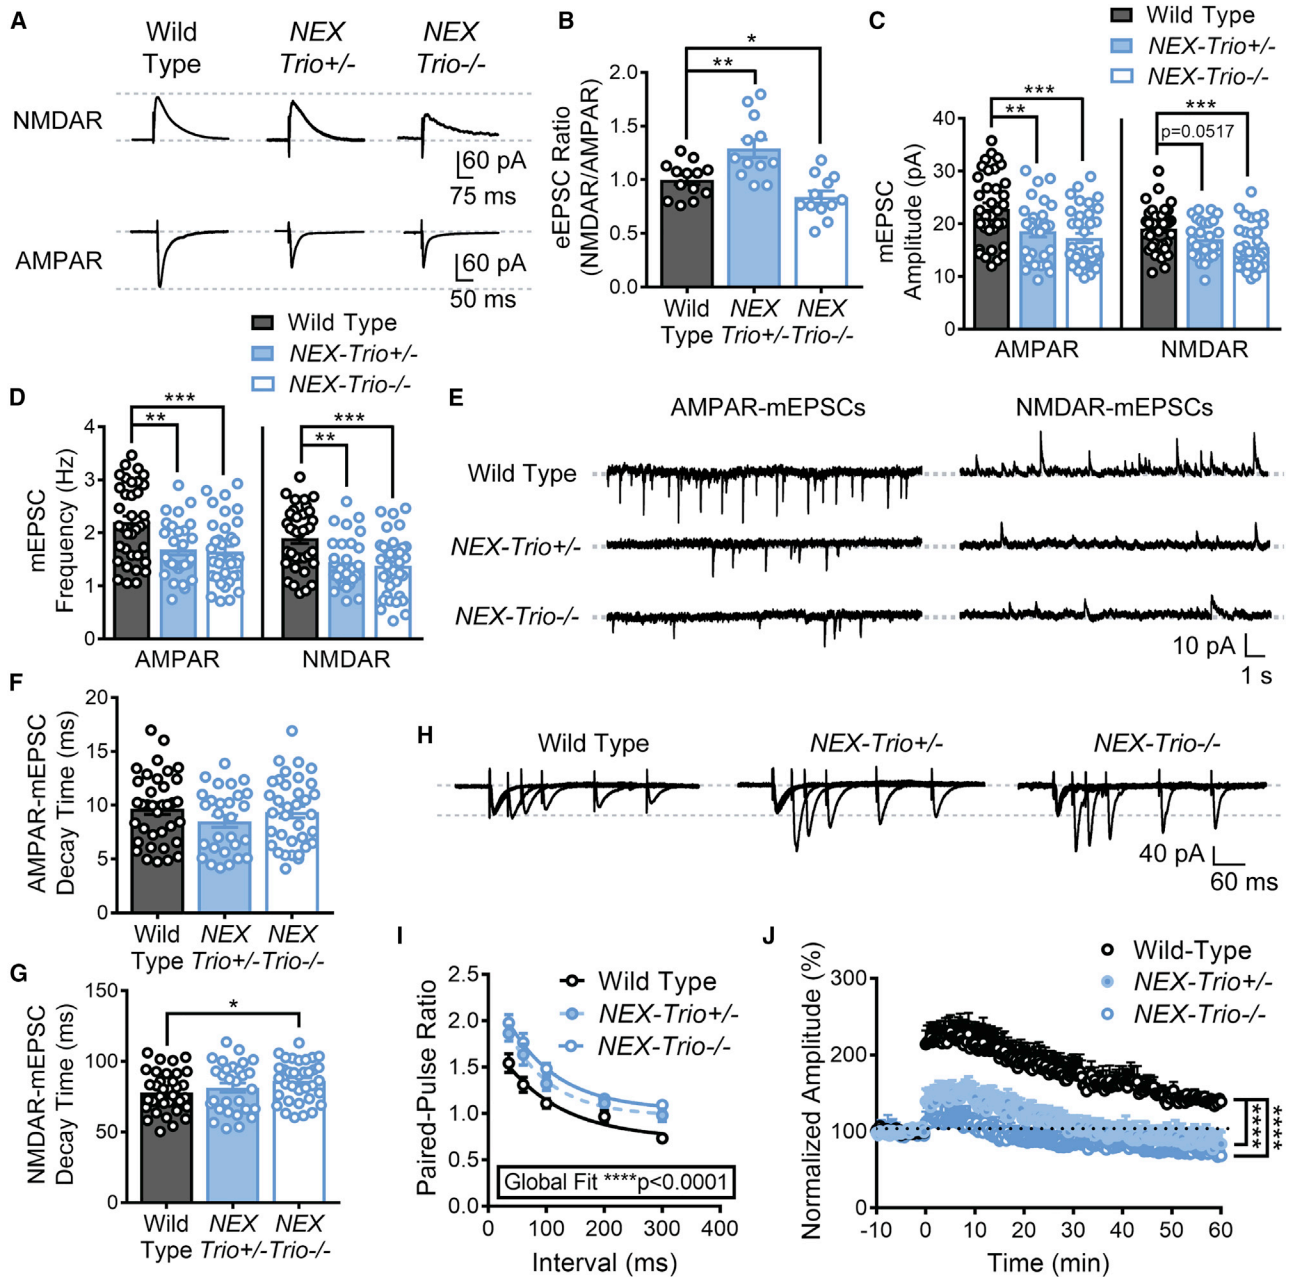

**Figure 6. *NEX-Trio<sup>+/-</sup>* and *NEX-Trio<sup>-/-</sup>* Mice Exhibit Deficits in Pre- and Postsynaptic Function and Synaptic Plasticity**

(A) Representative traces of NMDAR- and AMPAR-eEPSCs from *NEX-Trio<sup>+/-</sup>*, *NEX-Trio<sup>-/-</sup>*, and WT L5 PNs in the motor cortex (M1).  
 (B) The NMDAR/AMPAR eEPSC ratio was increased in *NEX-Trio<sup>+/-</sup>* mice and decreased in *NEX-Trio<sup>-/-</sup>* mice relative to WT controls. Unpaired t tests identified differences between groups (n = 12–14 neurons from 4 mice per group).  
 (C and D) *NEX-Trio<sup>+/-</sup>* and *NEX-Trio<sup>-/-</sup>* mice had decreased AMPAR-mEPSC amplitude (C, left) and frequency (D, left). *NEX-Trio<sup>-/-</sup>* mice also had decreased NMDAR-mEPSC amplitude (C, right) and frequency (D, right). *NEX-Trio<sup>+/-</sup>* mice trended toward decreased NMDAR-mEPSC amplitude (C, right) and had decreased NMDAR-mEPSC frequency (D, right).  
 (E) Representative traces of AMPAR- and NMDAR-mEPSCs from WT, *NEX-Trio<sup>+/-</sup>*, and *NEX-Trio<sup>-/-</sup>* L5 PNs in the motor cortex (M1).  
 (F and G) *NEX-Trio<sup>+/-</sup>* mice showed no difference in AMPAR- (F) or NMDAR-mEPSC (G) decay time. *NEX-Trio<sup>-/-</sup>* mice showed no difference in AMPAR-mEPSC decay time (F) but increased NMDAR-mEPSC decay time (G). To consistently analyze *NEX-Trio<sup>+/-</sup>* and *NEX-Trio<sup>-/-</sup>* mice independently, unpaired t tests identified differences between groups (n = 28–36 neurons from 5–7 mice per group).  
 (H) Representative traces of eEPSCs from WT, *NEX-Trio<sup>+/-</sup>*, and *NEX-Trio<sup>-/-</sup>* L5 PNs in the motor cortex (M1) evoked by paired-pulse stimulation of M1 layer 2/3.  
 (I) An increase in the paired-pulse ratio was observed in *NEX-Trio<sup>+/-</sup>* and *NEX-Trio<sup>-/-</sup>* mice, suggesting a deficit in presynaptic release probability. A one-phase decay global fit analysis identified differences between groups. Post hoc Bonf MC test indicated that *NEX-Trio<sup>+/-</sup>* was significantly different from WT at (legend continued on next page)

that LTP is impaired with reduced TRIO function suggests that defects in plasticity likely contribute to the observed motor coordination and learning deficits. Overall, our data suggest that TRIO plays important roles in both synaptic transmission and plasticity. Furthermore, the observed increase in dendritic spine density, decrease in PSD length, decrease in mEPSC frequency, and impairment in LTP together suggest that there are more immature dendritic spines in the cortex, an anatomical hallmark of many NDDs (Martínez-Cerdeño, 2017).

### Human Protein-Truncating Variants in NDDs Are Modeled by Heterozygous *Trio* Disruption in the Mouse Brain

Disruption of the *Trio* allele in *NEX-Trio+/-* mice closely models the protein-truncating variants (PTVs) that impair TRIO GEF1 activity, including the schizophrenia- or autism-associated R1276X, I1329Frameshift, and F1538Intron mutations (Genovese et al., 2016; Katrancha et al., 2017; De Rubeis et al., 2014). However, it remains unknown whether missense mutations in the TRIO GEF1 domain, which also impair TRIO's GEF1 activity (Katrancha et al., 2017; Sadybekov et al., 2017), or other PTVs and missense mutations (e.g., in the GEF2 or kinase domains) would yield similar deficits in neuronal structure, synaptic function, and behavior. The study of mice bearing select disease-associated alleles should reveal whether specific disruptions of TRIO function differentially impact *Trio*-dependent phenotypes, as has been observed in mice bearing different mutant alleles of *Shank3* (Zhou et al., 2016).

### Conclusions

*TRIO* has emerged as a risk gene for many NDDs with mutations likely causing genetic insufficiency. A critical need exists to determine TRIO's role in NDD pathology, so we performed a systematic investigation of the impact of *Trio* haploinsufficiency on the vertebrate central nervous system. Our data demonstrate that *Trio* haploinsufficiency is sufficient to impair normal neuron structure and connectivity as well as synaptic transmission and plasticity. We propose that disruptive or hypomorphic *TRIO* alleles reduce PDE4A5 levels, increase PKA signaling, and contribute to NDDs through similar impairments in structure and function in affected individuals.

### STAR★METHODS

Detailed methods are provided in the online version of this paper and include the following:

- KEY RESOURCES TABLE
- CONTACT FOR REAGENT AND RESOURCE SHARING
- EXPERIMENTAL MODEL AND SUBJECT DETAILS
  - *NEX-Trio+/-* and *NEX-Trio-/-* mice
  - *Trio<sup>flox/flox</sup>* mouse fibroblasts
  - *Trio<sup>+/-flox</sup>* mouse primary cortical cultures

### METHOD DETAILS

- Mouse genotyping
- Immunoblot assays
- Brain and body weight measurements
- Dendrite arbor reconstructions
- Dendritic spine density analyses
- Electron microscopy
- Electrophysiological recordings
- Proteomics and phosphoproteomics sample preparation
- Proteomics and phosphoproteomics data acquisition
- Proteomics and phosphoproteomics data analysis
- Primary cortical culture
- Fibroblast cell immunofluorescence
- Behavioral tests
- Novel object recognition task
- Prepulse inhibition of acoustic startle
- Nestlet shredding
- Social preference test
- Open field test
- Elevated plus maze
- Forced swim test
- Accelerating rotarod
- Kondziela inverted screen test

### QUANTIFICATION AND STATISTICAL ANALYSIS

### DATA AND SOFTWARE AVAILABILITY

### SUPPLEMENTAL INFORMATION

Supplemental Information includes seven figures and can be found with this article online at <https://doi.org/10.1016/j.celrep.2019.02.022>.

### ACKNOWLEDGMENTS

The authors thank Chris Kaliszewski and Xianyun Ye for assisting with experiments. Thanks to Aaron Levy, Ethan Sarnoski, and Ed Scolnick for helpful comments on the manuscript. Klaus-Armin Nave (University of Göttingen, Max Planck Institute of Experimental Medicine) generously provided the *NEX-Cre* mouse line. Pietro De Camilli (Yale University) generously provided the CHC primary antibody. Angus Nairn and Becky Carlyle (Yale University) generously provided the pTriEx-6-PDE4A5 DNA plasmid. This work was supported by NIH grants NS089662 (A.J.K.), NS105640 (A.J.K. and Michael J. Higley), MH115939 (A.J.K.), DC013791 (C.A.G.), DC015438 (C.A.G.), DC012441 (C.A.G.), and F31MH116571 (J.E.S.); a pilot award from the Stanley Center/Broad Institute (A.J.K., Dick Mains, and Betty Eipper); a Yale Gruber Science Fellowship (S.M.K.); a National Science Foundation Graduate Research Fellowship (S.M.K.); and NIH training grant T32GM007223 to J.E.S. (Susan J. Baserga).

### AUTHOR CONTRIBUTIONS

S.M.K. and A.J.K. designed the study and wrote the manuscript. S.M.K. conducted dendrite reconstructions, electron microscopy, and behavioral experiments; A.Y.Z. analyzed the FST data. A.Y.Z. and S.M.K. performed immunoblots. S.M.K. and J.E.S. conducted brain and body weight experiments.

35\* and 60\*\* ms ( $p = 0.07$  at 300 ms), and *NEX-Trio+/-* was significantly different from WT at 35\*\*\*\*, 60\*\*\*\*, 100\*\*\*, and 300\*\* ms ( $p = 0.18$  at 200 ms;  $n = 20$ –26 neurons from 5–7 mice per group).

(J) *NEX-Trio+/-* and *NEX-Trio-/-* mice had impaired LTP in the motor cortex, showing only slight induction and no potentiation compared to WT controls. LTP was induced at 0 min. RM two-way ANOVA with post hoc Bonf MC test identified differences ( $n = 9$ –11 neurons from  $\geq 6$  mice per group).

See also Figures S6 and S7. Data are represented as mean  $\pm$  SEM (\* $p < 0.05$ ; \*\* $p < 0.01$ ; \*\*\* $p < 0.001$ ; \*\*\*\* $p < 0.0001$ ).



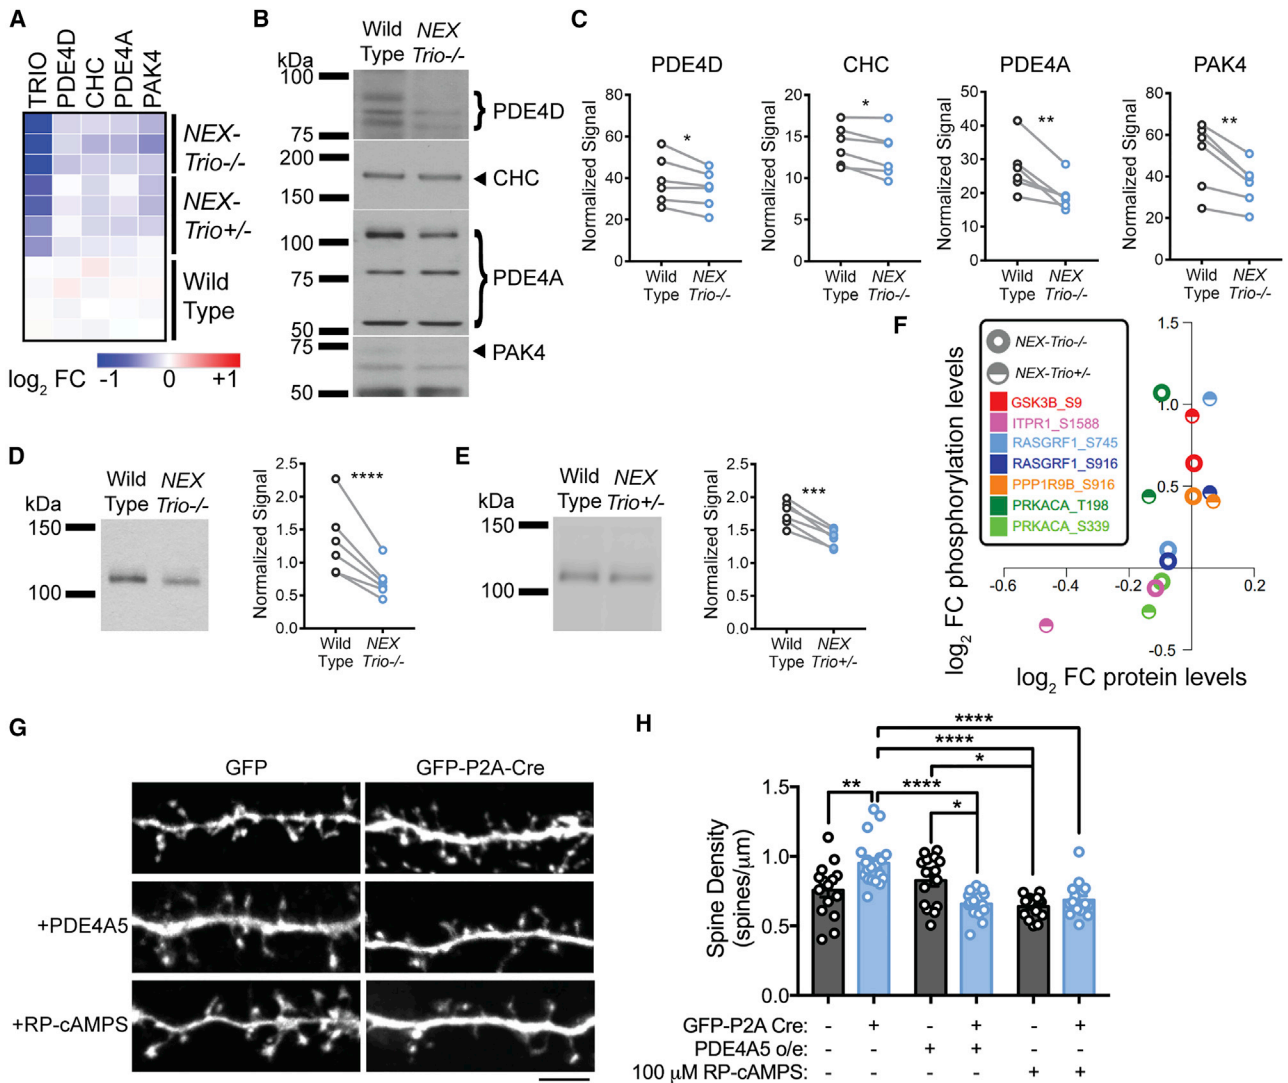

**Figure 7. *NEX-Trio<sup>+/-</sup>* and *NEX-Trio<sup>-/-</sup>* Mice Have Decreased PDE4A5 Levels and Increased PKA Signaling, and PDE4A5 Overexpression and Drug-Based Attenuation of PKA Signaling Rescue *Trio*-Induced Increases in Dendritic Spine Density**

(A) Heatmap illustrating the log<sub>2</sub> fold change (FC) of select proteins compared to WT quantified by mass-spectrometry-based proteomics. All selected proteins were reduced in the motor cortex of *NEX-Trio<sup>-/-</sup>* and *NEX-Trio<sup>+/-</sup>* mice compared to WT.

(B) Representative immunoblots for selected proteins in the cortex are shown for male *NEX-Trio<sup>-/-</sup>* and WT mice (P42); bands of interest are marked by arrows (single band) or brackets (multiple bands).

(C) PDE4D, CHC, PDE4A, and PAK4 protein levels were reduced in the cortex of *NEX-Trio<sup>-/-</sup>* mice relative to WT littermates.

(D and E) PDE4A5 protein levels were reduced in the cortex of *NEX-Trio<sup>-/-</sup>* (D) and *NEX-Trio<sup>+/-</sup>* (E) mice. Representative immunoblots are shown. Ratio paired t test identified differences (n = 6 littermate pairs).

(F) Scatterplot representing the average log<sub>2</sub> FC compared to WT for PKA substrates detected in the kinase-substrate pair enrichment analysis. The log<sub>2</sub> FCs at phosphorylation sites are plotted against the log<sub>2</sub> FCs of the respective protein levels. Each color represents a distinct PKA substrate phosphorylation site; half circles represent *NEX-Trio<sup>+/-</sup>* data, and open circles represent *NEX-Trio<sup>-/-</sup>* data.

(G) Representative immunofluorescence images of *Trio<sup>+/-lox</sup>* neurons transfected with just GFP (WT) or GFP-P2A-Cre (*Cre-Trio<sup>+/-</sup>*); top) for 6 days. A subset of neurons was treated with PDE4A5 overexpression (middle) or 100 μM Rp-cAMPS (bottom). Scale bar represents 5 μm.

(H) Dendritic spine density was increased in Cre-positive *Trio<sup>+/-lox</sup>* neurons, and this was rescued with overexpression (o/e) of PDE4A5 for 6 days or treatment with 100 μM Rp-cAMPS for 3 days. Unpaired t tests identified differences between groups (n = 15–21 dendrite segments from ≥ 3 cells per group).

See also Figure S7. Data are represented as mean ± SEM (\*p < 0.05; \*\*p < 0.01; \*\*\*p < 0.001; \*\*\*\*p < 0.0001).

S.M.K. and A.T.J. performed dendritic spine analyses. X.X. conducted electrophysiological experiments. J.E.S. conducted neuronal culture and fibroblast experiments. S.M.K. collected samples, S.A.M. and A.R.C. performed and analyzed, and S.A.C. provided support for proteomics experiments. M.Z.

created the “floxed” *Trio* mice. C.P. provided support for behavioral experiments. C.A.G. provided support for electron microscopy and dendrite reconstructions. All authors reviewed, suggested edits, and approved the final manuscript.



## DECLARATION OF INTERESTS

The authors declare no competing interests.

Received: May 17, 2018

Revised: December 22, 2018

Accepted: February 6, 2019

Published: March 5, 2019

## REFERENCES

- Angoa-Pérez, M., Kane, M.J., Briggs, D.I., Francescutti, D.M., and Kuhn, D.M. (2013). Marble burying and nestlet shredding as tests of repetitive, compulsive-like behaviors in mice. *J. Vis. Exp.*, 50978.
- Awasaki, T., Saito, M., Sone, M., Suzuki, E., Sakai, R., Ito, K., and Hama, C. (2000). The *Drosophila* trio plays an essential role in patterning of axons by regulating their directional extension. *Neuron* 26, 119–131.
- Ba, W., Yan, Y., Reijnders, M.R.F., Schuurs-Hoeijmakers, J.H.M., Feenstra, I., Bongers, E.M.H.F., Bosch, D.G.M., De Leeuw, N., Pfundt, R., Gilissen, C., et al. (2016). TRIO loss of function is associated with mild intellectual disability and affects dendritic branching and synapse function. *Hum. Mol. Genet.* 25, 892–902.
- Baldan Ramsey, L.C., Xu, M., Wood, N., and Pittenger, C. (2011). Lesions of the dorsomedial striatum disrupt prepulse inhibition. *Neuroscience* 180, 222–228.
- Ball, R.W., Warren-Paquin, M., Tsurudome, K., Liao, E.H., Elazzouzi, F., Cavanagh, C., An, B.S., Wang, T.T., White, J.H., and Haghighi, A.P. (2010). Retrograde BMP signaling controls synaptic growth at the NMJ by regulating trio expression in motor neurons. *Neuron* 66, 536–549.
- Bateman, J., Shu, H., and Van Vactor, D. (2000). The guanine nucleotide exchange factor trio mediates axonal development in the *Drosophila* embryo. *Neuron* 26, 93–106.
- Bellanger, J.M., Lazaro, J.B., Diriong, S., Fernandez, A., Lamb, N., and Debant, A. (1998). The two guanine nucleotide exchange factor domains of Trio link the Rac1 and the RhoA pathways in vivo. *Oncogene* 16, 147–152.
- Bellanger, J.M., Astier, C., Sardet, C., Ohta, Y., Stossel, T.P., and Debant, A. (2000). The Rac1- and RhoG-specific GEF domain of Trio targets filamin to remodel cytoskeletal actin. *Nat. Cell Biol.* 2, 888–892.
- Blangy, A., Vignall, E., Schmidt, S., Debant, A., Gauthier-Rouvière, C., and Fort, P. (2000). TrioGEF1 controls Rac- and Cdc42-dependent cell structures through the direct activation of rhoG. *J. Cell Sci.* 113, 729–739.
- Blatt, G.J. (2012). The neuropathology of autism. *Scientifica (Cairo)* 2012, 703675.
- Broadbent, N.J., Gaskin, S., Squire, L.R., and Clark, R.E. (2009). Object recognition memory and the rodent hippocampus. *Learn. Mem.* 17, 5–11.
- Chen, S.Y., Huang, P.H., and Cheng, H.J. (2011). Disrupted-in-schizophrenia 1-mediated axon guidance involves TRIO-RAC-PAK small GTPase pathway signaling. *Proc. Natl. Acad. Sci. USA* 108, 5861–5866.
- Cohen, S.J., Munchow, A.H., Rios, L.M., Zhang, G., Asgeirsdóttir, H.N., and Stackman, R.W., Jr. (2013). The rodent hippocampus is essential for nonspatial object memory. *Curr. Biol.* 23, 1685–1690.
- Costa, R.M., Cohen, D., and Nicolelis, M.A.L. (2004). Differential corticostriatal plasticity during fast and slow motor skill learning in mice. *Curr. Biol.* 14, 1124–1134.
- De Rubeis, S., He, X., Goldberg, A.P., Poultney, C.S., Samocha, K., Cicek, A.E., Kou, Y., Liu, L., Fromer, M., Walker, S., et al.; DDD Study; Homozygosity Mapping Collaborative for Autism; UK10K Consortium (2014). Synaptic, transcriptional and chromatin genes disrupted in autism. *Nature* 515, 209–215.
- Deacon, R.M.J. (2013). Measuring the strength of mice. *J. Vis. Exp.*, 2610.
- Debant, A., Serra-Pagès, C., Seipel, K., O'Brien, S., Tang, M., Park, S.H., and Streuli, M. (1996). The multidomain protein Trio binds the LAR transmembrane tyrosine phosphatase, contains a protein kinase domain, and has separate rac-specific and rho-specific guanine nucleotide exchange factor domains. *Proc. Natl. Acad. Sci. USA* 93, 5466–5471.
- Feng, G., Mellor, R.H., Bernstein, M., Keller-Peck, C., Nguyen, Q.T., Wallace, M., Nerbonne, J.M., Lichtman, J.W., and Sanes, J.R. (2000). Imaging neuronal subsets in transgenic mice expressing multiple spectral variants of GFP. *Neuron* 28, 41–51.
- Frankfurt, M., and Luine, V. (2015). The evolving role of dendritic spines and memory: Interaction(s) with estradiol. *Horm. Behav.* 74, 28–36.
- Genovese, G., Fromer, M., Stahl, E.A., Ruderfer, D.M., Chambert, K., Landén, M., Moran, J.L., Purcell, S.M., Sklar, P., Sullivan, P.F., et al. (2016). Increased burden of ultra-rare protein-altering variants among 4,877 individuals with schizophrenia. *Nat. Neurosci.* 19, 1433–1441.
- Geyer, M.A., and Dulawa, S.C. (2003). Assessment of murine startle reactivity, prepulse inhibition, and habituation. *Curr. Protoc. Neurosci. Chapter 8*, Unit 8.17.
- Glantz, L.A., and Lewis, D.A. (2000). Decreased dendritic spine density on prefrontal cortical pyramidal neurons in schizophrenia. *Arch. Gen. Psychiatry* 57, 65–73.
- Goebbels, S., Bormuth, I., Bode, U., Hermanson, O., Schwab, M.H., and Nave, K.-A. (2006). Genetic targeting of principal neurons in neocortex and hippocampus of NEX-Cre mice. *Genesis* 44, 611–621.
- Hakeda-Suzuki, S., Ng, J., Tzu, J., Dietzl, G., Sun, Y., Harms, M., Nardine, T., Luo, L., and Dickson, B.J. (2002). Rac function and regulation during *Drosophila* development. *Nature* 416, 438–442.
- Herring, B.E., and Nicoll, R.A. (2016). Kalirin and Trio proteins serve critical roles in excitatory synaptic transmission and LTP. *Proc. Natl. Acad. Sci. USA* 113, 2264–2269.
- Hutsler, J.J., and Zhang, H. (2010). Increased dendritic spine densities on cortical projection neurons in autism spectrum disorders. *Brain Res.* 1309, 83–94.
- Iyer, S.C., Wang, D., Iyer, E.P.R., Trunnell, S.A., Meduri, R., Shinwari, R., Sulkowski, M.J., and Cox, D.N. (2012). The RhoGEF trio functions in sculpting class specific dendrite morphogenesis in *Drosophila* sensory neurons. *PLoS ONE* 7, e33634.
- Katrantha, S.M., Wu, Y., Zhu, M., Eipper, B.A., Koleske, A.J., and Mains, R.E. (2017). Neurodevelopmental disease-associated de novo mutations and rare sequence variants affect TRIO GDP/GTP exchange factor activity. *Hum. Mol. Genet.* 26, 4728–4740.
- Konopaske, G.T., Lange, N., Coyle, J.T., and Benes, F.M. (2014). Prefrontal cortical dendritic spine pathology in schizophrenia and bipolar disorder. *JAMA Psychiatry* 71, 1323–1331.
- Kulkarni, V.A., and Firestein, B.L. (2012). The dendritic tree and brain disorders. *Mol. Cell. Neurosci.* 50, 10–20.
- Lek, M., Karczewski, K.J., Minikel, E.V., Samocha, K.E., Banks, E., Fennell, T., O'Donnell-Luria, A.H., Ware, J.S., Hill, A.J., Cummings, B.B., et al.; Exome Aggregation Consortium (2016). Analysis of protein-coding genetic variation in 60,706 humans. *Nature* 536, 285–291.
- Li, Q., Ko, H., Qian, Z.M., Yan, L.Y.C., Chan, D.C.W., Arbutnot, G., Ke, Y., and Yung, W.H. (2017). Refinement of learned skilled movement representation in motor cortex deep output layer. *Nat. Commun.* 8, 15834.
- Lin, Y.-C., Yeckel, M.F., and Koleske, A.J. (2013). Abl2/Arg controls dendritic spine and dendrite arbor stability via distinct cytoskeletal control pathways. *J. Neurosci.* 33, 1846–1857.
- Martínez-Cerdeño, V. (2017). Dendrite and spine modifications in autism and related neurodevelopmental disorders in patients and animal models. *Dev. Neurobiol.* 77, 393–404.
- McPherson, C.E., Eipper, B.A., and Mains, R.E. (2005). Multiple novel isoforms of Trio are expressed in the developing rat brain. *Gene* 347, 125–135.
- Mertins, P., Tang, L.C., Krug, K., Clark, D.J., Gritsenko, M.A., Chen, L., Clauser, K.R., Clauss, T.R., Shah, P., Gillette, M.A., et al. (2018). Reproducible workflow for multiplexed deep-scale proteome and phosphoproteome analysis of tumor tissues by liquid chromatography-mass spectrometry. *Nat. Protoc.* 13, 1632–1661.

- Miller, M.B., Yan, Y., Eipper, B.A., and Mains, R.E. (2013). Neuronal Rho GEFs in synaptic physiology and behavior. *Neuroscientist* 19, 255–273.
- Moresco, E.M., Donaldson, S., Williamson, A., and Koleske, A.J. (2005). Integrin-mediated dendrite branch maintenance requires Abelson (Abl) family kinases. *J. Neurosci.* 25, 6105–6118.
- Murdoch, H., Mackie, S., Collins, D.M., Hill, E.V., Bolger, G.B., Klussmann, E., Porteous, D.J., Millar, J.K., and Houslay, M.D. (2007). Isoform-selective susceptibility of DISC1/phosphodiesterase-4 complexes to dissociation by elevated intracellular cAMP levels. *J. Neurosci.* 27, 9513–9524.
- Newsome, T.P., Schmidt, S., Dietzl, G., Keleman, K., Åsling, B., Debant, A., and Dickson, B.J. (2000). Trio combines with dock to regulate Pak activity during photoreceptor axon pathfinding in *Drosophila*. *Cell* 101, 283–294.
- O'Brien, S.P., Seipel, K., Medley, Q.G., Bronson, R., Segal, R., and Streuli, M. (2000). Skeletal muscle deformity and neuronal disorder in Trio exchange factor-deficient mouse embryos. *Proc. Natl. Acad. Sci. USA* 97, 12074–12078.
- Omar, M.H., Kerrisk Campbell, M., Xiao, X., Zhong, Q., Brunken, W.J., Miner, J.H., Greer, C.A., and Koleske, A.J. (2017). CNS neurons deposit laminin  $\alpha 5$  to stabilize synapses. *Cell Rep.* 21, 1281–1292.
- Parwani, A., Duncan, E.J., Bartlett, E., Madonick, S.H., Efferen, T.R., Rajan, R., Sanfilippo, M., Chappell, P.B., Chakravorty, S., Gonzenbach, S., et al. (2000). Impaired prepulse inhibition of acoustic startle in schizophrenia. *Biol. Psychiatry* 47, 662–669.
- Pawson, C., Eaton, B.A., and Davis, G.W. (2008). Formin-dependent synaptic growth: evidence that Dlar signals via Diaphanous to modulate synaptic actin and dynamic pioneer microtubules. *J. Neurosci.* 28, 11111–11123.
- Paxinos, G., and Franklin, K.B.J. (2012). *The Mouse Brain in Stereotaxic Coordinates*, Fourth Edition (Academic Press).
- Peng, Y.J., He, W.Q., Tang, J., Tao, T., Chen, C., Gao, Y.Q., Zhang, W.C., He, X.Y., Dai, Y.Y., Zhu, N.C., et al. (2010). Trio is a key guanine nucleotide exchange factor coordinating regulation of the migration and morphogenesis of granule cells in the developing cerebellum. *J. Biol. Chem.* 285, 24834–24844.
- Rapanelli, M., Frick, L.R., Xu, M., Groman, S.M., Jindachomthong, K., Tamamaki, N., Tanahira, C., Taylor, J.R., and Pittenger, C. (2017). Targeted interneuron depletion in the dorsal striatum produces autism-like behavioral abnormalities in male but not female mice. *Biol. Psychiatry* 82, 194–203.
- Rioult-Pedotti, M.S., Friedman, D., and Donoghue, J.P. (2000). Learning-induced LTP in neocortex. *Science* 290, 533–536.
- Sadybekov, A., Tian, C., Arnesano, C., Katritch, V., and Herring, B.E. (2017). An autism spectrum disorder-related de novo mutation hotspot discovered in the GEF1 domain of Trio. *Nat. Commun.* 8, 601.
- Samocha, K.E., Robinson, E.B., Sanders, S.J., Stevens, C., Sabo, A., McGrath, L.M., Kosmicki, J.A., Rehnström, K., Mallick, S., Kirby, A., et al. (2014). A framework for the interpretation of de novo mutation in human disease. *Nat. Genet.* 46, 944–950.
- Sfakianos, M.K., Eisman, A., Gourley, S.L., Bradley, W.D., Scheetz, A.J., Setleman, J., Taylor, J.R., Greer, C.A., Williamson, A., and Koleske, A.J. (2007). Inhibition of Rho via Arg and p190RhoGAP in the postnatal mouse hippocampus regulates dendritic spine maturation, synapse and dendrite stability, and behavior. *J. Neurosci.* 27, 10982–10992.
- Shivalkar, M., and Giniger, E. (2012). Control of dendritic morphogenesis by Trio in *Drosophila melanogaster*. *PLoS ONE* 7, e33737.
- Smyth, G.K. (2004). Linear models and empirical bayes methods for assessing differential expression in microarray experiments. *Stat. Appl. Genet. Mol. Biol.* 3, e3.
- Steven, R., Kubiseski, T.J., Zheng, H., Kulkarni, S., Mancillas, J., Ruiz Morales, A., Hogue, C.W.V., Pawson, T., and Culotti, J. (1998). UNC-73 activates the Rac GTPase and is required for cell and growth cone migrations in *C. elegans*. *Cell* 92, 785–795.
- Tarbox, S.I., Addington, J., Cadenhead, K.S., Cannon, T.D., Cornblatt, B.A., Perkins, D.O., Seidman, L.J., Tsuang, M.T., Walker, E.F., Heinssen, R., et al. (2013). Premorbid functional development and conversion to psychosis in clinical high-risk youths. *Dev. Psychopathol.* 25, 1171–1186.
- Taylor, J.R., Birnbaum, S., Ubriani, R., and Arnsten, A.F. (1999). Activation of cAMP-dependent protein kinase A in prefrontal cortex impairs working memory performance. *J. Neurosci.* 19, RC23.
- van Erp, T.G.M., Walton, E., Hibar, D.P., Schmaal, L., Jiang, W., Glahn, D.C., Pearlson, G.D., Yao, N., Fukunaga, M., Hashimoto, R., et al.; Karolinska Schizophrenia Project (2018). Cortical brain abnormalities in 4474 individuals with schizophrenia and 5098 control subjects via the Enhancing Neuro Imaging Genetics Through Meta Analysis (ENIGMA) Consortium. *Biol. Psychiatry* 84, 644–654.
- van Haren, J., Boudeau, J., Schmidt, S., Basu, S., Liu, Z., Lammers, D., Demmers, J., Benhari, J., Grosveld, F., Debant, A., and Galjart, N. (2014). Dynamic microtubules catalyze formation of navigator-TRIO complexes to regulate neurite extension. *Curr. Biol.* 24, 1778–1785.
- Walker, E.F., Savoie, T., and Davis, D. (1994). Neuromotor precursors of schizophrenia. *Schizophr. Bull.* 20, 441–451.
- Weidner, C., Fischer, C., and Sauer, S. (2014). PHOXTRACK—a tool for interpreting comprehensive datasets of post-translational modifications of proteins. *Bioinformatics* 30, 3410–3411.
- Xiao, X., Levy, A.D., Rosenberg, B.J., Higley, M.J., and Koleske, A.J. (2016). Disruption of coordinated presynaptic and postsynaptic maturation underlies the defects in hippocampal synapse stability and plasticity in Abl2/Arg-deficient mice. *J. Neurosci.* 36, 6778–6791.
- Yu, X., and Zuo, Y. (2011). Spine plasticity in the motor cortex. *Curr. Opin. Neurobiol.* 21, 169–174.
- Zhou, Y., Kaiser, T., Monteiro, P., Zhang, X., Van der Goes, M.S., Wang, D., Barak, B., Zeng, M., Li, C., Lu, C., et al. (2016). Mice with Shank3 mutations associated with ASD and schizophrenia display both shared and distinct defects. *Neuron* 89, 147–162.
- Zong, W., Liu, S., Wang, X., Zhang, J., Zhang, T., Liu, Z., Wang, D., Zhang, A., Zhu, M., and Gao, J. (2015). Trio gene is required for mouse learning ability. *Brain Res.* 1608, 82–90.

## STAR★METHODS

### KEY RESOURCES TABLE

| REAGENT or RESOURCE                                                                                                   | SOURCE                                                                                                                                  | IDENTIFIER                                                                            |
|-----------------------------------------------------------------------------------------------------------------------|-----------------------------------------------------------------------------------------------------------------------------------------|---------------------------------------------------------------------------------------|
| <b>Antibodies</b>                                                                                                     |                                                                                                                                         |                                                                                       |
| Rabbit Primary Antibody: TRIO Sec14 domain                                                                            | <a href="#">Katrancha et al., 2017; McPherson et al., 2005</a>                                                                          | N/A                                                                                   |
| Rabbit Primary Antibody: Phosphodiesterase 4D (PDE4D)                                                                 | Millipore                                                                                                                               | Cat#ABS22                                                                             |
| Rabbit Primary Antibody: Phosphodiesterase 4A (PDE4A)                                                                 | Abcam                                                                                                                                   | Cat#ab14607                                                                           |
| Rabbit Primary Antibody: Phosphodiesterase 4A Isoform 5 (PDE4A5)                                                      | Abcam                                                                                                                                   | Cat#ab42094                                                                           |
| Rabbit Primary Antibody: P21 (RAC1) Activated Kinase 4 (PAK4)                                                         | Proteintech                                                                                                                             | Cat#14685-1-AP                                                                        |
| Rabbit Primary Antibody: Clathrin Heavy Chain (CHC)                                                                   | Pietro De Camilli lab, Yale University                                                                                                  | N/A                                                                                   |
| Goat Secondary Antibody: Anti-Rabbit                                                                                  | Bio-Rad                                                                                                                                 | Cat#170-6515                                                                          |
| Nanobody: anti-GFP-booster_Atto488                                                                                    | Chromotek                                                                                                                               | Cat#gba-488                                                                           |
| Mouse Primary Antibody: anti-RFP                                                                                      | Rockland                                                                                                                                | Cat#200-301-379                                                                       |
| Rabbit Primary Antibody: TRIO Guanine Nucleotide Exchange Factor (GEF) Dbl Homology 2 (DH2) domain                    | <a href="#">Katrancha et al., 2017</a>                                                                                                  | N/A                                                                                   |
| Donkey Secondary Antibody: Anti-Mouse AlexaFluor568                                                                   | Invitrogen                                                                                                                              | Cat#A10037                                                                            |
| Donkey Secondary Antibody: Anti-Rabbit AlexaFluor647                                                                  | Invitrogen                                                                                                                              | Cat#A31573                                                                            |
| <b>Chemicals, Peptides, and Recombinant Proteins</b>                                                                  |                                                                                                                                         |                                                                                       |
| Lipofectamine 3000                                                                                                    | Invitrogen                                                                                                                              | Cat#L3000001                                                                          |
| Permunt                                                                                                               | Fisher Scientific                                                                                                                       | Cat#SP15-100                                                                          |
| AquaMount                                                                                                             | Lerner Laboratories                                                                                                                     | Cat#13800                                                                             |
| ProLong Diamond Antifade Mountant                                                                                     | Invitrogen                                                                                                                              | Cat#P36970                                                                            |
| Rp-cAMPS                                                                                                              | Tocris                                                                                                                                  | Cat#1337                                                                              |
| Tandem mass tag TMT10                                                                                                 | Thermo                                                                                                                                  | Cat#90406; Lot#SE240163                                                               |
| Tandem mass tag TMT11 channel                                                                                         | Thermo                                                                                                                                  | Cat#1863196B; Lot#RK245431                                                            |
| Poly-D-lysine                                                                                                         | Corning                                                                                                                                 | Cat#354210                                                                            |
| Human fibronectin                                                                                                     | GIBCO                                                                                                                                   | Cat#33016-015                                                                         |
| <b>Critical Commercial Assays</b>                                                                                     |                                                                                                                                         |                                                                                       |
| FD Rapid GolgiStain Kit                                                                                               | FD NeuroTechnologies, Inc                                                                                                               | Cat#PK401                                                                             |
| <b>Deposited Data</b>                                                                                                 |                                                                                                                                         |                                                                                       |
| Original mass spectra download under the identifier: < MSV000083386 >                                                 | MassIVE ( <a href="https://massive.ucsd.edu/ProteoSAFe/static/massive.jsp">https://massive.ucsd.edu/ProteoSAFe/static/massive.jsp</a> ) | <a href="ftp://massive.ucsd.edu/MSV000083386">ftp://massive.ucsd.edu/MSV000083386</a> |
| <b>Experimental Models: Cell Lines</b>                                                                                |                                                                                                                                         |                                                                                       |
| <i>Trio<sup>flox/flox</sup></i> mouse fibroblasts                                                                     | This Paper                                                                                                                              | N/A                                                                                   |
| <b>Experimental Models: Organisms/Strains</b>                                                                         |                                                                                                                                         |                                                                                       |
| Mouse (C57BL/6 × 129/SvJ): “floxed” <i>Trio</i> allele: <i>Trio<sup>flox/flox</sup></i> ( <i>Trio<sup>-/-</sup></i> ) | <a href="#">Zong et al., 2015</a>                                                                                                       | N/A                                                                                   |
| Mouse (C57BL/6 × 129/SvJ): <i>NEX(Neurod6)-Cre</i> transgene: <i>NEX-Cre</i>                                          | <a href="#">Goebbels et al., 2006</a>                                                                                                   | N/A                                                                                   |
| Mouse (C57BL/6 × 129/SvJ): Thy1-GFP-M line: <i>Thy1-GFP</i>                                                           | <a href="#">Feng et al., 2000</a>                                                                                                       | N/A                                                                                   |

(Continued on next page)

| <b>Continued</b>                                                           |                                                    |                                                                                                                                                                             |
|----------------------------------------------------------------------------|----------------------------------------------------|-----------------------------------------------------------------------------------------------------------------------------------------------------------------------------|
| REAGENT or RESOURCE                                                        | SOURCE                                             | IDENTIFIER                                                                                                                                                                  |
| <b>Oligonucleotides</b>                                                    |                                                    |                                                                                                                                                                             |
| “Floxed” <i>Trio</i> genotyping primer 1: 5’-TTG TTC CAT TTA CGT CAC CG-3’ | Zong et al., 2015                                  | N/A                                                                                                                                                                         |
| “Floxed” <i>Trio</i> genotyping primer 2: 5’-CCT CAG GGA AGA GAC TA-3’     | Zong et al., 2015                                  | N/A                                                                                                                                                                         |
| <i>GFP</i> genotyping primer 1: 5’-GCA CGA CTT CAA GTC CGC CAT GCC-3’      | Omar et al., 2017                                  | N/A                                                                                                                                                                         |
| <i>GFP</i> genotyping primer 2: 5’-GCG GAT CTT GAA GTT CAC CTT GAT GCC-3’  | Omar et al., 2017                                  | N/A                                                                                                                                                                         |
| <i>NEX-Cre</i> genotyping primer 1: 5’-AGA ATG TGG AGT AGG GTG AC-3’       | Omar et al., 2017                                  | N/A                                                                                                                                                                         |
| <i>NEX-Cre</i> genotyping primer 2: 5’-GAG TCC TGG AAT CAG TCT TTT TC-3’   | Omar et al., 2017                                  | N/A                                                                                                                                                                         |
| <i>NEX-Cre</i> genotyping primer 3: 5’-CCG CAT AAC CAG TGA AAC AG-3’       | Omar et al., 2017                                  | N/A                                                                                                                                                                         |
| <b>Recombinant DNA</b>                                                     |                                                    |                                                                                                                                                                             |
| pEGFP-N1                                                                   | Clontech                                           | N/A                                                                                                                                                                         |
| pAAV-CAG-“GFP-P2A-Cre”                                                     | Jaime Grutzendler, Yale University                 | N/A                                                                                                                                                                         |
| pTriEx-6-PDE4A5                                                            | Becky Carlyle and Angus Nairn, Yale University     | N/A                                                                                                                                                                         |
| pLL3.7-RFP                                                                 | Lin et al., 2013                                   | N/A                                                                                                                                                                         |
| pAAV-mCherry-IRES-Cre                                                      | Karl Deisseroth, Stanford University (via Addgene) | Addgene Plasmid #55632                                                                                                                                                      |
| <b>Software and Algorithms</b>                                             |                                                    |                                                                                                                                                                             |
| NeuroLucida software                                                       | MicroBrightField (MBF) Bioscience                  | <a href="https://www.mbfioscience.com/neuroLucida">https://www.mbfioscience.com/neuroLucida</a>                                                                             |
| NeuroExplorer software                                                     | Nex Technologies                                   | <a href="https://www.neuroexplorer.com/">https://www.neuroexplorer.com/</a>                                                                                                 |
| ImageJ software                                                            | NIH                                                | <a href="https://imagej.nih.gov/ij/">https://imagej.nih.gov/ij/</a>                                                                                                         |
| Mini-Analysis software                                                     | Synaptosoft                                        | <a href="http://www.synaptosoft.com/MiniAnalysis/">http://www.synaptosoft.com/MiniAnalysis/</a>                                                                             |
| Spectrum Mill software                                                     | Agilent Technologies                               | <a href="http://proteomics.broadinstitute.org/">proteomics.broadinstitute.org/</a>                                                                                          |
| SR Lab Startle Response System software                                    | San Diego Instruments                              | <a href="https://www.sandiegoinstruments.com/product/sr-lab/">https://www.sandiegoinstruments.com/product/sr-lab/</a>                                                       |
| AnyMaze software                                                           | Stoelting                                          | <a href="http://www.anymaze.co.uk/">http://www.anymaze.co.uk/</a>                                                                                                           |
| Fusion software, Version 4.5                                               | Omnitech Electronics                               | <a href="http://www.omnitech-electronics.com/product/Fusion-Software/510">http://www.omnitech-electronics.com/product/Fusion-Software/510</a>                               |
| Morpheus software                                                          | Broad Institute of MIT and Harvard                 | <a href="https://software.broadinstitute.org/morpheus/">https://software.broadinstitute.org/morpheus/</a>                                                                   |
| Phoxtrack tool                                                             | Weidner et al., 2014                               | N/A                                                                                                                                                                         |
| pClamp software suite (pClamp and Clampfit)                                | Molecular Devices                                  | <a href="https://www.moleculardevices.com/products/axon-patch-clamp-system/">https://www.moleculardevices.com/products/axon-patch-clamp-system/</a>                         |
| N-1 Chi-Square test                                                        | MeasuringU                                         | <a href="https://measuringu.com/ab-cal/">https://measuringu.com/ab-cal/</a>                                                                                                 |
| R Studio software                                                          | RStudio                                            | <a href="https://www.rstudio.com/">https://www.rstudio.com/</a>                                                                                                             |
| Prism 7 software                                                           | GraphPad                                           | <a href="https://www.graphpad.com/scientific-software/prism/">https://www.graphpad.com/scientific-software/prism/</a>                                                       |
| <b>Other</b>                                                               |                                                    |                                                                                                                                                                             |
| Elevated Plus Maze                                                         | Stoelting                                          | Cat#60140                                                                                                                                                                   |
| Five-lane rotarod treadmill                                                | Med Associates                                     | Cat#ENV-577M                                                                                                                                                                |
| Open Field Test                                                            | Omnitech Electronics                               | <a href="http://www.omnitech-electronics.com/product/Open-Field-Locomotor-Activity/1010">http://www.omnitech-electronics.com/product/Open-Field-Locomotor-Activity/1010</a> |
| Optimal Cutting Temperature Compound                                       | Tissue-Tek                                         | Cat#4583                                                                                                                                                                    |

(Continued on next page)



**Continued**

| REAGENT or RESOURCE                    | SOURCE                    | IDENTIFIER                       |
|----------------------------------------|---------------------------|----------------------------------|
| Cryomold (10 mm x 10 mm x 5 mm)        | Tissue-Tek                | Cat#4565                         |
| Colorfrost Plus microscope slides      | Thermo Scientific Shandon | Cat#9991013                      |
| TissueTUBE TT1                         | Covaris                   | Tube Cat#520001; Plug Cat#520006 |
| CP02 cryoPREP Automated Dry Pulverizer | Covaris                   | Cat#500001                       |
| Axopatch patch-clamp amplifier         | Molecular Devices         | Cat#700B                         |

**CONTACT FOR REAGENT AND RESOURCE SHARING**

Further information and requests for resources and reagents should be directed to and will be fulfilled by the Lead Contact, Anthony J. Koleske ([anthony.koleske@yale.edu](mailto:anthony.koleske@yale.edu)). Restrictions may apply to reagents and resources from outside sources, especially those with Material Transfer Agreements (MTA), including (1) *NEX-Cre* mice - received under MTA from the Klaus-Armin Nave laboratory at the University of Göttingen, (2) “floxed” *Trio* mice - received under MTA from the Minsheng Zhu laboratory at Nanjing University, (3) rabbit primary antibody for Clathrin Heavy Chain – received an in-house stock aliquot from Pietro De Camilli laboratory at Yale University, (4) pAAV-mCherry-IRES-Cre DNA plasmid – available at Addgene (Plasmid #55632), (5) pAAV-CAG-“GFP-P2A-Cre” DNA plasmid – received from Jaime Grutzendler at Yale University, and (6) pTriEx-6-PDE4A5 DNA plasmid – received from Becky Carlyle and Angus Nairn at Yale University.

**EXPERIMENTAL MODEL AND SUBJECT DETAILS*****NEX-Trio+/-* and *NEX-Trio-/-* mice**

Mice bearing a conditional “floxed” *Trio* allele (Zong et al., 2015) and a *NEX(Neurod6)-Cre* transgene (Goebbels et al., 2006) were crossed to produce heterozygous *NEX-Cre, Trio<sup>+floxed</sup> (NEX-Trio+/-)* and homozygous *NEX-Cre, Trio<sup>flox/flox</sup> (NEX-Trio-/-)* mice. Wild-type (WT) mice lacked *NEX-Cre*. For dendritic spine visualization, mice were crossed to the *Thy1-GFP-M* line (Feng et al., 2000) to produce *Thy1-GFP-M, NEX-Cre, Trio<sup>+floxed</sup> (NEX-Trio+/-)* and *Thy1-GFP-M, NEX-Cre, Trio<sup>flox/flox</sup> (NEX-Trio-/-)* mice; WT mice lacked *NEX-Cre*. All mice were in a mixed C57BL/6 × 129/SvJ background. Animal genotypes were determined by PCR, as described in the [Method Details](#) section.

Mice were group housed with siblings of the same sex and kept on a standard 12-hour light/dark cycle. Behavioral analyses were performed with male and female littermates at postnatal day (P)42–P70. Brain and body weight measurements were performed with male and female mice at P21 and P42; male and female mice were analyzed together at P21. To control for potential sex differences and estrus effects in adult mice (Frankfurt and Luine, 2015), only male mice at P37–P45 were used for electrophysiological analyses, and only male mice at P42 were used for anatomical, proteomic, and phosphoproteomic analyses. All immunoblots were performed on male mice at P42; TRIO immunoblots were also performed on female mice at P42. All procedures were compliant with federal regulations and approved by the Yale University Animal Care and Use Committee.

***Trio<sup>flox/flox</sup>* mouse fibroblasts**

*Trio<sup>flox/flox</sup>* mouse fibroblasts were prepared from embryonic day 13.5 mouse embryos (combination of sexes). Fibroblasts were kept at 37°C and 5% CO<sub>2</sub> and passaged at 3.75x10<sup>5</sup> per 10 cm plate every three days until immortalized using the 3T3 protocol. Fibroblasts were maintained in DMEM plus 10% fetal bovine serum (FBS), 2 mM L-glutamine, and penicillin/streptomycin.

***Trio<sup>+floxed</sup>* mouse primary cortical cultures**

Primary neuronal cultures were prepared from embryonic day 15.5 *Trio<sup>+floxed</sup>* mouse embryos (combination of sexes). Cortices were dissected in ice-cold HBSS (Invitrogen) with 25 mM HEPES and 0.5% glucose and then digested in the same solution with 0.3 U/ml papain (Worthington, Lakewood, NJ), 0.1% dispase (Roche, Indianapolis, IN), and 0.01% DNaseI (Sigma) at 37°C (twice for 7 minutes). Tissues were triturated 20 times with a glass Pasteur pipette (Moresco et al., 2005). Neurons were resuspended and plated in Neurobasal A (Invitrogen) supplemented with 2% Gem21 (Gemini) and 10% FBS on 12 mm coverslips precoated with 20 µg/ml poly-D-lysine (Corning Inc.) overnight at 37°C and 1 µg/ml laminin (Corning) for 2 hours at 37°C. After 4 hours, the media was changed to serum-free Neurobasal A/Gem21 media containing 1% penicillin/streptomycin and 2 mM L-glutamine, and cultures were maintained at 37°C and 5% CO<sub>2</sub>. Glial growth was suppressed with 1 µM ara-C (Sigma) on day *in vitro* (DIV) 3 and 0.5 µM ara-C on DIV6.

**METHOD DETAILS****Mouse genotyping**

Mouse genotypes were determined by PCR using the following primers for “floxed” *Trio* (5'-TTG TTC CAT TTA CGT CAC CG-3' and 5'-CCT CCT CAG GGA AGA GAC TA-3') (Zong et al., 2015), *Nex-Cre* (5'-AGA ATG TGG AGT AGG GTG AC-3', 5'-GAG TCC TGG AAT

CAG TCT TTT TC-3', and 5'-CCG CAT AAC CAG TGA AAC AG-3') (Omar et al., 2017), and *GFP* (5'-GCA CGA CTT CTT CAA GTC CGC CAT GCC-3' and 5'-GCG GAT CTT GAA GTT CAC CTT GAT GCC-3') (Omar et al., 2017). For PCR analyses, tissue was digested overnight at 55°C in a solution containing Gitschier buffer (2 M Tris (pH 8.8), 1 M NH<sub>4</sub>SO<sub>4</sub>, 1 M MgCl<sub>2</sub>, 10% Triton X-100, and water), beta-mercaptoethanol, and proteinase K. Digests were vortexed, heated at 95°C for 10 minutes, vortexed, and centrifuged. PCR analysis was performed on digested tissue with dNTPs, PCR buffer, relevant primers, MgCl<sub>2</sub>, and DNA polymerase. PCR protocol was as follows: (1) 90°C for 5 minutes, (2) 94°C for 1 minute, (3) 65°C for 1 minute, (4) 72°C for 1 minute, (5) go to step 2 and repeat 34 times, (6) 72°C for 10 minutes, and (7) 4°C forever.

### Immunoblot assays

Cortical, hippocampal, and cerebellar extracts from *NEX-Trio*<sup>+/-</sup> mice, *NEX-Trio*<sup>-/-</sup> mice, and WT littermates at P42 were created by sonicating brain tissue in 1% sodium dodecyl sulfate (SDS), 50 mM Tris, 2 mM ethylenediaminetetraacetic acid (EDTA), protease inhibitors, and phosphatase inhibitors with a small tip probe sonicator (Heat Systems, Ultrasonics, Inc. model W-375) at 4.5 Amps for 15-30 s. The brain homogenates were immediately placed at 95°C for 5 minutes, snap frozen in liquid nitrogen, and stored at -80°C until immunoblotting. Protein concentrations were determined with a bicinchoninic acid (BCA) assay (Pierce) performed in a 96-well plate on a microplate reader (SpectraMax M5, Molecular Devices) against a standard bovine serum albumin (BSA) curve. 15 µg and 30 µg of brain homogenate were diluted with 4x Laemmli sample buffer (LSB) and separated using SDS polyacrylamide gel electrophoresis on a precast 4%–15% gradient gel (Bio-Rad #456-1084). For TRIO immunoblots, proteins were transferred using wet transfer methods to nitrocellulose at 300 mA for 180 minutes on ice. For other immunoblots, proteins were transferred using wet transfer methods to nitrocellulose at 35 V overnight on ice. Membranes were stained with Ponceau S and imaged, blocked with 5% nonfat milk for 1 hour at room temperature, and incubated overnight at 4°C with primary antibodies, which included 1:4,000 TRIO Sec14 (Katrancha et al., 2017; McPherson et al., 2005), 1:1,000 PDE4D (Millipore ABS22), 1:1,000 PDE4A (Abcam ab14607), 1:1,000 PDE4A5 (Abcam ab42094), 1:1,000 PAK4 (Proteintech 14685-1-AP), and 1:1,000 CHC (Pietro De Camilli lab, Yale University) primary antibodies. Membranes were washed with Tris Buffered Saline with Tween 20 (TBST), incubated at room temperature for 2 hours in 1:5,000 goat anti-rabbit secondary antibody (Bio-Rad, 170-6515), and washed again with TBST. Signal was detected with an enhanced chemiluminescence substrate using the Genesis software (Syngene, version 1.4.5.0) on a G:Box Chemi XRQ (Syngene). Densitometry values were calculated in ImageJ and normalized to each lane's total protein as determined by Ponceau S. For TRIO analyses, densitometry values were normalized again to the 30 µg WT sample for each littermate pair.

### Brain and body weight measurements

*NEX-Trio*<sup>+/-</sup>, *NEX-Trio*<sup>-/-</sup>, and WT mice were weighed at P21 and P42. Brains from *NEX-Trio*<sup>+/-</sup>, *NEX-Trio*<sup>-/-</sup>, and WT mice were also weighed at P21 and P42 (1) after removing external portions of the brain stem and the olfactory bulbs and (2) after removing the cerebellum and the remainder of the brain stem. Olfactory bulbs and brain stem were also removed before imaging.

### Dendrite arbor reconstructions

*NEX-Trio*<sup>+/-</sup>, *NEX-Trio*<sup>-/-</sup>, and WT mice at P42 were deeply anesthetized by pentobarbital sodium injection (Nembutal Sodium Solution) and transcardially perfused/cleared with PBS for 2 minutes. The following Golgi staining protocol was performed using the FD Rapid GolgiStain Kit (FD NeuroTechnologies, Inc) and adapted from their manual. The brain was quickly and carefully removed, rinsed in PBS, and immersed in Golgi impregnation solution. The brain was moved into new Golgi impregnation solution after 12-24 hours and allowed to sit for 2 weeks in the dark at room temperature. The brain was then transferred to Solution C for 24 hours, before being transferred to a new aliquot of Solution C for an additional 48 hours. Brains were embedded in Optimal Cutting Temperature Compound (Tissue-Tek, 4583) inside a cryomold (10 mm x 10 mm x 5 mm, Tissue-Tek, 4565) and snap frozen in a dry ice and 100% ethanol bath. Sagittal sections were cut at 150 µm on a cryostat (Cryostat 2800 Frigocut-E, Reichert-Jung) set at -22°C and placed into room temperature PBS. The PBS was removed and replaced with Solution C before mounting. Sections were mounted onto gelatin-coated coverslips and allowed to dry for 48 hours at room temperature in the dark. Staining was performed in a series of Coplin staining jars: two 4-minute rinses in double distilled water, one 10-minute rinse in Solutions D/E, two 4-minute rinses in double distilled water, one 4-minute rinse in 50% ethanol, one 4-minute rinse in 70% ethanol, two 4-minute rinses in 100% ethanol, and two 4-minute rinses in xylenes. Slides were coverslipped with Permount (Fisher Scientific, SP15-100) and allowed to dry overnight. Dendrite reconstructions were performed using the NeuroLucida software (MicroBrightField) at 100x magnification using a light microscope outfitted with a Z drive. Layer 5 pyramidal neurons were identified based upon the neuron's location relative to other cells within the cortex, the presence of a pyramidal cell body, and the presence of a strong apical arbor that extended to the surface. Motor cortex (M1 and M2) was identified by comparing to "The Mouse Brain in Stereotaxic Coordinates" (Paxinos and Franklin, 2012). Sholl analysis, total dendrite length, and branch point number were analyzed using the NeuroExplorer software (Nex Technologies). Neuron tracings were performed by an experimenter blinded to genotype. Five neurons were sampled from each animal; four animals were used per genotype.

### Dendritic spine density analyses

Thy1-GFP-M-expressing *NEX-Trio*<sup>+/-</sup>, *NEX-Trio*<sup>-/-</sup>, and WT mice at P42 were deeply anesthetized by pentobarbital sodium injection (Nembutal Sodium Solution) and transcardially perfused with 4% paraformaldehyde in phosphate buffered saline (PBS). Brains

were postfixed at 4°C overnight and rinsed in PBS; 40 µm coronal slices were acquired on a Vibratome Series 1000 Sectioning System (Lancer). Slices containing the hippocampus were immediately mounted onto slides, while slices containing the motor cortex were stained with 4',6-diamidino-2-phenylindole (DAPI) to identify the basal dendrites of layer 5 pyramidal neurons in motor cortex. Specifically, slices were incubated in 1:10,000 DAPI solution (Thermo Fisher Scientific, 62248) in 3% BSA in PBS by gently shaking for 10 minutes at room temperature and then washed 3 times with PBS. Slices were mounted onto Colorfrost Plus microscope slides (Thermo Scientific Shandon, 9991013), allowed to dry for 30 minutes, and coated with ProLong Diamond Antifade Mountant (Invitrogen, P36970) and a microscope cover glass (Fisherbrand, 12-545-F). The slides were allowed to dry overnight at 4°C. The next day, clear nail polish was added to the edges, and the slides were allowed to dry for 24 hours before imaging. An experimenter blinded to genotype acquired images on an UltraVIEW VoX spinning disc confocal (Perkin Elmer) Nikon Ti-E-Eclipse microscope using a 100x CFI Plan Apo VC, NA 1.4, oil objective and a 14 bit Hamamatsu (C9100-50) EM CCD camera. Full z stack images were exported from Volocity (Perkin Elmer) and merged using the NIH ImageJ software. Layer 5 pyramidal neurons were identified at 10x by observing the neuron's location based upon the DAPI staining and by a pyramidal cell body with the start of a strong apical dendrite. Motor cortex (M1 and M2) was identified by comparing to "The Mouse Brain in Stereotaxic Coordinates" (4<sup>th</sup> edition, by George Paxinos and Keith B.J. Franklin). An experimenter blinded to genotype analyzed the data, counting dendritic spines on secondary dendritic branches; groups with direct comparisons were analyzed together.

### Electron microscopy

Electron microscopy was performed as previously described (Omar et al., 2017) with minor modifications. *NEX-Trio*+/-, *NEX-Trio*-/-, and WT mice at P42 were deeply anesthetized by pentobarbital sodium injection (Nembutal Sodium Solution) and transcardially perfused with 4% paraformaldehyde and 2% glutaraldehyde in PBS. Brains were postfixed at 4°C overnight and rinsed in PBS; 50 µm coronal slices were acquired on a Vibratome Series 1000 Sectioning System (Lancer). Slices containing the motor cortex (M1 and M2) were identified by comparing them to "The Mouse Brain in Stereotaxic Coordinates" (4<sup>th</sup> edition, by George Paxinos and Keith B.J. Franklin); chosen slices were near the point of corpus callosum fusion (~1.09 mm rostral to Bregma). The slices were processed for 1 hour in 4% OsO<sub>4</sub>, dehydrated in an ethanol/propylene oxide series, and stained with 1% uranyl acetate in 70% ethanol for 1 hour. Next, the slices were stained with lead citrate, embedded in Epon, resectioned at 70 nm using an ultramicrotome, and collected on Formvar-coated slot grids. Images were taken on a JEOL 1200 EX electron microscope at 12,000x magnification. Synapse density, PSD length, spine head area, and presynaptic bouton area were quantified using ImageJ software. The analyses were performed within a 994 ± 4 µm<sup>2</sup> area of layer 5 motor cortex (M1) using eighteen 55.2 ± 0.2 µm<sup>2</sup> fields of view per mouse. Synapses were identified by: (1) a plasma membrane surrounding and between pre- and postsynaptic compartments, (2) a PSD in the postsynaptic compartment, and (3) vesicles in the presynaptic compartment. Synapse density was the total number of spines divided by the field of view area. PSD length was the cross-sectional length of the PSD within identified synapses. Spine head and presynaptic bouton areas were measured by tracing the plasma membrane of spines and boutons in identified synapses; the tracings included the entire spine or bouton down to the narrowest part of the spine or axon neck.

### Electrophysiological recordings

Slices were prepared and recordings were performed as previously described (Xiao et al., 2016). *NEX-Trio*+/-, *NEX-Trio*-/-, and WT mice at P37-P45 were deeply anesthetized with pentobarbital sodium injection (Nembutal Sodium Solution) and their brains rapidly removed and cooled in ice-cold sucrose-containing artificial cerebrospinal fluid (sucrose-ACSF, in mM): 2.5 KCl, 7 MgSO<sub>4</sub>·7H<sub>2</sub>O, 1.25 NaH<sub>2</sub>PO<sub>4</sub>, 0.5 CaCl<sub>2</sub>·2H<sub>2</sub>O, 28 NaHCO<sub>3</sub>, 7 dextrose, 205 sucrose saturated with 95% O<sub>2</sub>-5% O<sub>2</sub> at 290-320 mOsmol/L, pH 7.4. Coronal slices including the area of hippocampus and M1 cortex were cut at 350 µm in ice-cold sucrose-ACSF on a vibratome (Leica), then recovered in a humidified, oxygenated environment at 33.5°C for at least 30 minutes. Slices were perfused during recording at 1 ml/min with ACSF (in mM): 3 KCl, 1 MgSO<sub>4</sub>·7H<sub>2</sub>O, 1.25 NaH<sub>2</sub>PO<sub>4</sub>, 2 CaCl<sub>2</sub>·2H<sub>2</sub>O, 26 NaHCO<sub>3</sub>, 10 dextrose, 118 NaCl, 0.4 ascorbic acid, 4 Na-lactic acid, 2 Na-pyruvic acid saturated with 95% O<sub>2</sub>-5% O<sub>2</sub> at 290-320 mOsmol/L, pH 7.4. 10 µM bicuculline methiodide (BMI) was included in the ACSF. CA1 and M1 pyramidal neurons were identified using DIC and infrared optics with a water-immersion objective (NIR Apo 40x; BX51, Nikon) at room temperature (RT), and whole-cell recordings were obtained with an Axopatch 700B patch-clamp amplifier (Molecular Devices) using recording electrodes pulled from 1.5 mm glass capillaries on a Flaming-Brown micropipette puller (Sutter Instruments) filled with (in mM): 137 cesium gluconate, 10 NaCl, 0.2 EGTA, 4 Na<sub>2</sub>ATP, 0.3 Na<sub>3</sub>GTP, 5 Na<sub>2</sub>-phosphocreatine, 10 HEPES, 5 QX-314 chloride adjusted to 300 mOsmol/L pH 7.4. Under these conditions, the recording electrodes had a resistance of 3-6 MΩ. Recorded signals were low pass filtered at 2 kHz and digitized at 5 kHz with a Digidata 1440 digitizer (Molecular Devices). Cells were excluded if series resistance deviated > 20% or exceeded 20 MΩ. Data were collected in pClamp 10.3 and analyzed with Clampfit 10.3.

Excitatory postsynaptic currents (EPSCs) were evoked with 0.05 Hz stimulation by a tungsten bipolar stimulating electrode placed ~100 µm away from the recording electrode using stimulus intensities that yielded 50%-60% of the maximal response. AMPAR-eEPSC amplitudes were measured at the peak of the EPSC recorded at -70 mV holding potential. NMDAR-eEPSC amplitudes were recorded from the same neurons at +40 mV 40 ms after the stimulus artifact when AMPAR-eEPSCs have decayed. Miniature EPSCs (mEPSCs) were recorded in whole-cell patch mode. AMPAR-mEPSCs were recorded at -70 mV and NMDAR-mEPSCs were recorded at +40 mV with tetrodotoxin and BMI in the external solution. Amplitude, frequency, and decay time of miniature events were detected using Mini-Analysis software (Synaptosoft, Decatur, GA) and inspected visually to exclude overlapping events and

events on a noisy baseline. In the paired-pulse ratio (PPR) experiments, the paired-pulse stimulation (interstimulus intervals (ISIs) of 35, 60, 75, 100, 200 or 300 ms) was delivered via a bipolar tungsten stimulating electrode placed in CA3 Schaffer collateral axons in the hippocampus or in layer 2/3 of the motor cortex. The second EPSC (EPSC2), which was evoked by the second of the paired-pulse stimulations, was divided by EPSC1 to obtain a PPR. PPR was assessed at five ISIs (35, 60, 100, 200, and 300 ms) in M1 neurons and at 75ms ISI in hippocampal neurons. Long-term potentiation (LTP) of evoked EPSCs (recorded at  $-70$  mV) was induced by theta-burst stimulation (TBS, five trains of four pulses at 100 Hz in 200 ms intervals, repeated four times with an interval of 10 s) in the presence of 10  $\mu$ M BMI.

### Proteomics and phosphoproteomics sample preparation

Mice at P42 were deeply anesthetized. The motor cortex was removed with the assistance of a mouse Brain Matrix and immediately frozen in liquid nitrogen. Dissected mouse cortex slices were transferred to Covaris tissueTUBE TT1 (Part No. 520001, Plug Part No. 520006), kept on dry ice, and flash frozen in liquid nitrogen immediately prior to cryopulverization using a Covaris CP02 cryoPREP Automated Dry Pulverizer (Part No. 500001). The resulting powdered samples were transferred into 1.5 mL microfuge tubes and kept at  $-80^{\circ}\text{C}$  until lysis. The cryopulverized samples were lysed in 300  $\mu$ l lysis buffer (8M urea, 150 mM NaCl, 50 mM TRIS, pH 8.0, 1 mM EDTA, containing protease and phosphatase inhibitors) on ice. Lysates were centrifuged for 30 minutes at  $4^{\circ}\text{C}$  at 10,000 rpm. Protein concentrations of supernatants were determined by BCA (Thermo). Cleared tissue lysates were reduced with 10 mM TCEP and cysteine alkylated with 10 mM iodoacetamide for 30 minutes in the dark at room temperature. Samples were diluted to 4 M urea with 200 mM Tris pH 8.0 and digested with LysC (1:50 enzyme:substrate ratio) for 90 minutes at  $37^{\circ}\text{C}$ . Samples were diluted to less than 2 M urea with 200 mM Tris pH 8.0 before adding trypsin (Promega) at the same ratio for overnight digestion at  $37^{\circ}\text{C}$ . Formic acid (FA) was added to a final concentration of 1%, and the samples desalted using 100 mg, 1 cc Sep-Pak (Waters). A 400  $\mu$ g aliquot of each sample digest was frozen and dried by vacuum centrifugation, then stored at  $-80^{\circ}\text{C}$  until tandem mass tag (TMT10, Thermo lot # SE240163, TMT11 channel, Thermo lot # RK245431) peptide labeling according to manufacturer instructions.

Desalted 11-plex TMT labeled peptides (4.4 mg total) were subjected to basic reversed-phase (RP) chromatography. Peptides were separated using a 4.6 mm x 250 mm RP Zorbax 300 A Extend-C18 column (Agilent, 3.5  $\mu$ m bead size) on an Agilent 1100 Series HPLC. The 96 minute gradient of solvent A (2% acetonitrile [ACN], 20 mM ammonium formate, pH 10) to solvent B (90% acetonitrile, 20 mM ammonium formate, pH 10) held at 0% B for seven minutes; then went from 0% to 16% B over six minutes; from 16% to 40% B over 60 minutes, from 40% to 44% B over four minutes; from 44% to 60% B in over five minutes, ending with a 14 minute hold at 60% B. The flow rate was 1 ml/min. 84 fractions were collected and concatenated down to 25 final fractions. 5% of each final fraction was used for proteome analysis.

The remaining 95% of each of the 25 fractions were concatenated to 13 fractions. These 13 fractions were IMAC enriched using Ni-NTA Agarose Beads (QIAGEN, Lot No. 154027064) for phosphoproteome analysis as previously described (Mertins et al., 2018), except the NTA was charged with 100 mM iron chloride instead of 10 mM.

### Proteomics and phosphoproteomics data acquisition

Proteome analysis was performed using a Proxeon EASY-nLC 1200 UHPLC coupled to an Orbitrap Q Exactive Plus mass spectrometer (Thermo Fisher Scientific). The online peptide separation was performed using a 20 cm x 75  $\mu$ m i.d. silica picofrit capillary column (New Objectives) packed with 1.9  $\mu$ m ReproSil-Pur C18-AQ beads (Dr. Maisch GmbH) at  $50^{\circ}\text{C}$ . The 110 minute method, 84 minute effective gradient, of solvent A (3% ACN, 0.1% FA) to solvent B (90% ACN, 0.1% FA) started at 2% B and went from 2% to 6% B over one minute; from 6% to 30% B over 84 minutes; from 30% to 60% B over 9 minutes; from 60% to 90% B over 1 minute, holding for five minutes, ramping down to 50% B over one minute and holding for 10 minutes. The flow rate was 200 nL/min for the first 100 minutes and 500 nL/min the last ten minutes. The Q Exactive Plus mass spectrometer performed data-dependent acquisition in positive ion mode. MS1 spectra scanned a range of 300-1800 m/z at a resolution of 70,000, with a maximum injection time (max IT) of 5 ms for a 3e6 AGC target. MS2 spectra scanned a range of 200-2,000 m/z at a resolution of 35,000. The top 12 most abundant peaks, charge state  $2 < x < 7$ , were selected for MS2 with an isolation width of 0.7 m/z and an offset of 0.0 m/z. The AGC target was set to 5e4 with a max IT of 120 ms. An empirically determined normalized collision energy was set to 30. Dynamic exclusion was set to 20 s.

Phosphoproteome analysis was performed as described above except data was acquired on a Orbitrap Fusion Lumos mass spectrometer (Thermo Fisher Scientific). The Lumos mass spectrometer performed data-dependent acquisition in positive ion mode. MS1 spectra scanned a range of 350-1,800 m/z at a resolution of 60,000, with a maximum injection time (max IT) of 50 ms for a 4e5 AGC target. MS2 spectra scanned at a resolution of 50,000, with a maximum injection time (max IT) of 105 ms for a 5e4 AGC target.

### Proteomics and phosphoproteomics data analysis

All .raw files were searched using Spectrum Mill (Agilent Technologies). MS2 spectra were searched against the Uniprot Mouse database (10/17/2014, 41,309 mouse entries, 150 common laboratory contaminants), with a mass tolerance of 20 ppm for both the precursor and product ions. The enzyme specificity was set for LysC/Trypsin and allowing up to three missed cleavages. The fixed modification was carbamidomethylation at cysteine. TMT labeling was required at lysine, but peptide *N*-termini were allowed to be either labeled or unlabeled. Allowed variable modifications for whole proteome datasets were acetylation of protein *N*-termini, oxidized methionine, deamidation of asparagine, and pyroglutamic acid at peptide *N*-terminal glutamine, with a precursor  $\text{MH}^+$  shift range of  $-18$  to 64 Da. The false discovery rate was determined to be less than 1%. For proteome interpretation, protein identifications



were discarded if the protein was only observed by a single peptide. For reporting number of proteins identified protein subgroups, protein gene products (proteoforms) from the same gene, were expanded to account for the observation of different proteoforms. For statistical tests protein subgroups were collapsed to the proteoform with the most evidence.

### Primary cortical culture

Cortical cultures were prepared from E15.5 *Trio<sup>+/-lox</sup>* mouse embryos as described in the [Experimental Model and Subject Details](#) section. Cells were transfected with pEGFP-N1 or pAAV-CAG-“GFP-P2A-Cre” and pTriEx-6-PDE4A5 (Becky Carlyle and Angus Nairn, Yale University) DNA by calcium-phosphate precipitation for 6 days starting at DIV9. 100  $\mu$ M Rp-cAMPS (Tocris 1337, dissolved in water) was applied to a subset of coverslips on DIV12. All coverslips were fixed with 2% PFA at DIV15, then stained with an anti-GFP-booster\_Atto488 nanobody. Neurons were imaged and dendritic spine density was analyzed as described in the *dendritic spine density analyses* section.

On DIV15, cells were fixed at room temperature for 20 minutes with 2% PFA in cytoskeleton buffer (CBS: 10 mM MES pH 6.8, 138 mM KCl, 3 mM MgCl<sub>2</sub>, 2 mM EGTA and 320 mM sucrose). Fixed cells were permeabilized for 15 minutes with 0.3% TX100/TBS (150 mM NaCl, 20 mM Tris pH 7.4), washed 3 times with 0.1% TX100/TBS, and blocked for 30 minutes with 0.3% TX100/2% BSA/10% Normal donkey Serum/TBS. Cells were then incubated at 4°C overnight with anti-GFP-booster\_Atto488 nanobody (Chromotek gba-488; 1:500) in 0.1% TX100/2% BSA/TBS. The next morning the cells were washed with 0.1% TX100/TBS, then mounted in AquaMount (Lerner Laboratories 13800) after a final wash with TBS and imaged on a spinning disk confocal as described in the *dendritic spine density analyses* section. Images were analyzed by an experimenter blind to genotype.

### Fibroblast cell immunofluorescence

$5 \times 10^4$  *Trio<sup>lox/lox</sup>* mouse fibroblast cells were plated the day before transfection and maintained in DMEM plus 10% fetal bovine serum (FBS), 2 mM l-glutamine, and penicillin/streptomycin at 37°C and 5% CO<sub>2</sub>. Cells were transfected with pLL3.7-RFP or pAAV-mCherry-IRES-Cre (Karl Deisseroth, Stanford University, via Addgene Plasmid #55632) using Lipofectamine 3000 (Invitrogen L3000001). Fresh media was put onto cells to remove transfection reagent after 24 hours. Cells were split once, 72 hours after transfection using 0.05% Trypsin-EDTA (GIBCO 25300-054). On Day 4, 12 mm coverslips were coated with 50  $\mu$ g/ml poly-D-lysine (Corning Inc.) for 20 minutes at room temperature before rinsing 3 times with PBS. Human fibronectin (GIBCO 33016-015) was diluted in PBS to a final concentration of 10  $\mu$ g/ml before putting on coverslips at 4°C overnight. The following day, coverslips were washed 3 times with PBS before blocking with 1% BSA (American Bio) in PBS for 1 hour at 37°C. Coverslips were washed 3 more times with PBS before plating cells.  $1.5 \times 10^4$  transfected fibroblast cells were seeded onto coated coverslips and let spread for 24 hours before fixing and staining.

Cells were immunostained as described in the *primary cortical culture* section with minor changes. Fixation in 2% PFA in CBS was performed for 5 minutes at room temperature. Cells were incubated with primary antibodies, mouse anti-RFP (Rockland 200-301-379; 1:1,000) and a rabbit antibody generated in-house to the DH portion of the TRIO GEF2 domain (DH2, 1:50) ([Katrancha et al., 2017](#)), at 4°C overnight. The next day, the cells were washed 3 times with 0.1% TX100/TBS and sequentially incubated with AlexaFluor568 donkey anti-mouse (Invitrogen A10037; 1:1,000) and AlexaFluor647 donkey anti-rabbit (Invitrogen A31573; 1:1,000), both diluted in 0.1% TX100/2% BSA/TBS, with three 0.1% TX100/TBS washes following each secondary. The coverslips were then mounted and imaged as described in the *dendritic spine density analyses* section, with identical imaging parameters between conditions. TRIO staining was quantified with NIH ImageJ software by tracing the outline of only transfected cells, using the RFP channel.

### Behavioral tests

*NEX-Trio+/-* mice, *NEX-Trio-/-* mice, and sex-matched WT littermates were used for all behavioral analyses. Behavioral tests took place between 6 and 10 weeks of age (P42-P70). At P42, mice were habituated to handling for 6 minutes per day for 5 days prior to experimentation.

### Novel object recognition task

The novel object recognition test assays recognition memory, a hippocampus-dependent behavior ([Broadbent et al., 2009](#); [Cohen et al., 2013](#)). This behavioral task was performed as previously described ([Omar et al., 2017](#); [Sfakianos et al., 2007](#)) in a quiet, moderately lit (100 lux) room separate from housing. Mice were habituated to a large polycarbonate cage (45 × 24 × 20 cm) with fitted filter-top covers in the testing room for 1 hour on both days. During object familiarization on day 1, two identical objects were placed on the left and right sides of the testing cage. Mice explored the objects until they accumulated 30 s of tactile exploration time, defined as direct oral or nasal contact. Mice were then returned to their homecage for 48 hours. During the novel object recognition task on day 3, one familiar and one novel object were placed on either side of the testing cage, and mice explored the objects until they accumulated 30 s of tactile exploration time. Mice were excluded from analysis if they failed to explore both objects or accumulate 30 s of tactile exploration time within 6 minutes on either day. Live scoring was performed by an experimenter blinded to genotype, and all sessions were video recorded.

### Prepulse inhibition of acoustic startle

The prepulse inhibition of acoustic startle is used to evaluate sensorimotor gating, which is deficient in individuals with schizophrenia (Parwani et al., 2000). This behavioral task was performed as previously described (Baldan Ramsey et al., 2011; Geyer and Dulawa, 2003) in a quiet room separate from housing. Mice were habituated to the testing room for 30 minutes prior to experimentation and then acclimated to the apparatus for 5 minutes. The test session involved four consecutive blocks of test trials, separated by 15 s, with continuous background noise (65 dB). In each block, eight trial types were used: “pulse-alone” trials (baseline startle) involved a 40 ms, 120 dB startle burst; the six independent “prepulse” trials involved a 20 ms prepulse (6, 12, or 16 dB above background) that occurred 30 or 100 ms prior to the 120 dB startle burst; and “no stimulus” trials involved only the background noise to assess spontaneous movement. Blocks 1 and 4 involved six consecutive pulse-alone trials. Blocks 2 and 3 involved six pulse-alone trials, five no stimulus trials, and five of each type of prepulse trial in a pseudo-random order. Overall, ninety-four test trials were performed in a twenty-eight-minute session. Trials with noisy baselines or excessive spontaneous movement prior to the pulse were excluded. Analyses were performed with the SR Lab Startle Response System software (San Diego Instruments) with a 10 ms baseline using an analysis window of 500 ms to 550 ms. All sound levels were measured on the “A” scale in dB (Geyer and Dulawa, 2003).

### Nestlet shredding

The nestlet shredding test is a test for stereotyped or repetitive behaviors, often seen in autism spectrum disorders (Angoa-Pérez et al., 2013). This behavioral task was performed in a quiet, moderately lit (100 lux) room separate from housing. Mice were habituated to the testing room for 1 hour prior to experimentation. A standard polycarbonate mouse cage (30 × 19 × 13 cm) was filled with unscented bedding material to a depth of 0.5 cm, the surface was leveled, and a fitted filter-top cover was placed on top. Cotton fiber nestlets (5 cm × 5 cm, 5 mm thick, 2–2.5 g each) were weighed on an analytical balance before being placed on top of the bedding. The test mouse was placed into the test cage and left undisturbed for 30 minutes. The remaining intact nestlet was removed and allowed to dry overnight before being weighed again. The percentage of nestlet shredded was calculated.

### Social preference test

The social preference test assays sociability by quantifying preference for a “stranger” mouse relative to an inanimate object (Rapanelli et al., 2017). This behavioral task was performed in a quiet, moderately lit (100 lux) room separate from housing. Mice were habituated to the testing room for 1 hour prior to experimentation. During the habituation phase, mice were placed in a 50 cm × 50 cm plexiglass box with two wire-mesh pencil holders (open side facing downward) for 10 minutes. Then, the mouse was briefly removed while an inanimate object (Duplo blocks of a similar size and color to a mouse) and a male conspecific “stranger” mouse were placed underneath separate wire-mesh pencil holders. The test mouse was then returned to the open field for 10 minutes, tracked using the AnyMaze software (Stoelting Co.), and scored for entries into and time within a social target zone and an equivalent nonsocial target zone. The target zones were defined by an annulus around the wire enclosure.

### Open field test

The open field test assays both general locomotor activity and anxiety-like behavior in rodents. This behavioral task was performed in a quiet, moderately lit (100 lux) room separate from housing. Mice were habituated to the testing room for 1 hour prior to experimentation. Individual mice were placed in a large, clear plexiglass box and monitored using the Fusion software connected to a light beam array (Omnitech Electronics, Open Field Test, Version 4.5) for 60 minutes. The following measurements were analyzed based upon beam breaks: total distance traveled, ambulatory time (successive beam breaks), and vertical activity time (z axis beam breaks).

### Elevated plus maze

The elevated plus maze assays anxiety-like behavior in rodents. This behavioral task was performed in a quiet, dimly lit (20–30 lux) room separate from housing. The apparatus is raised 36.5 cm above the ground with a 5 cm square center platform and four 30 cm × 5 cm arms; two of the arms are enclosed by 16 cm high walls (Stoelting Co, Wood Dale, IL). Mice were habituated to the testing room for 1 hour prior to experimentation. Mice were tested in 3 trials that were 5 minutes long with at least 10 minutes to rest between trials. Mice were placed directly on the center platform, tracked using the AnyMaze software (Stoelting Co.), and scored for time spent in the open arms.

### Forced swim test

The forced swim test assays behavioral despair in rodents. Mice were habituated to a quiet, moderately lit (100 lux) room separate from housing for 30 minutes prior to experimentation. Mice were then placed in a clear glass cylinder (14 cm in diameter) filled to a depth of 15 cm with water at 25°C and videotaped for 6 minutes. Mobility time was scored during the last 4 minutes of the trial by a blinded experimenter. Mobility was defined as the presence of active or escape directed movement. The total mobility time was subtracted from the total test time (240 s) to determine immobility time.

### Accelerating rotarod

The rotarod is used to assess motor coordination and motor learning in rodents. Mice were habituated to a quiet, moderately lit (100 lux) room separate from housing for 30 minutes prior to experimentation. A five-lane rotarod treadmill (Med Associates ENV-577M,

8.75" rod circumference) was used for accelerating analyses. Mice were acclimated to the rotating rod at 4 RPM for 10 s before beginning the test. Then, the rod accelerated from 4 to 40 RPM over the course of 5 minutes (1.2 RPM/10 s) before leveling off at 40 RPM for 2.5 minutes. The maximum trial duration was 7.5 minutes, requiring the mice to travel 1,837.5 inches. Five trials were performed per mouse with a rest time of at least 10 minutes between trials. The latency to fall was recorded per trial.

### Kondziela inverted screen test

The inverted screen test assays muscular strength in rodents. This behavioral task was adapted from methods previously described (Deacon, 2013). Briefly, mice were habituated to a quiet, moderately lit (100 lux) room separate from housing for 30 minutes prior to experimentation. The apparatus was a 40 cm square of wire-mesh with 12 mm squares of 1 mm diameter wire; it was surrounded by a square wooden frame (3.5 cm thick). During the training session on day 1, mice were placed in the center of the wire-mesh screen and rotated to an inverted position over 2 s. The screen was placed over a clear open box with the mice 45 cm above a padded surface. Mice were habituated to hanging on the screen until a cumulative hang time of 2 minutes was reached; mice were excluded if they were unable to meet this requirement. During the test session on day 2, mice were placed on the screen as before and given 3 trials to reach a maximum hang time of 8 minutes with 10-minute rest periods between trials. Mice reaching the 8-minute mark were deemed "successful," and mice failing to reach the mark were "unsuccessful."

### QUANTIFICATION AND STATISTICAL ANALYSIS

Statistical analyses were performed using either GraphPad Prism 7 or R software. For all assays, *NEX-Trio+/-* and *NEX-Trio-/-* mice were analyzed independently. Specific details of 'n' and statistical tests are included in the figure legends. Significance was defined by a p value less than 0.05. All pooled data are represented as mean  $\pm$  SEM.

For tests with two independent variables, a two-way ANOVA was performed prior to direct comparisons with a Bonferroni multiple comparisons post hoc test in Prism. To assay motor learning in the accelerating rotarod task, linear models were created in Prism, and post hoc comparisons were performed on the slopes and elevations/intercepts of the linear models. To assess PPR, a one phase decay global fit analysis was performed with post hoc Bonferroni multiple comparisons. For analyses including more than three independent variables (e.g., genotype, gender, and target zone for the social preference test), a linear regression model (lm function) was created in R. All meaningful interactions were tested, and significant interactions were included in the final model. Post hoc comparisons were performed with a Bonferroni multiple comparisons test in R (pairwise.t.test function with p.adj = "bonf"). Tests involving success rates (proportions) were analyzed using the N-1 Chi-Square test (<https://measuringu.com/ab-cal/>). Tests involving only one independent variable (genotype) for the comparison of two groups were analyzed using the unpaired Student's t test. For the proteomics immunoblot follow-up, a ratio paired t test was performed to compare the littermate pairs. The analysis of dendritic spine density was performed using a linear regression model in R (modeling density as a function of the mouse number, neuron number, and genotype) to control for similarities between spine densities acquired from the same neuron or mouse; this was similar for the electron microscopy-based measurements.

For proteomic analyses, the normalized and imputed dataset was subjected to a moderated F-test (Smyth, 2004), followed by Benjamini-Hochberg Procedure correcting for multiple hypothesis testing. We drew an arbitrary cutoff at adjusted p value < 0.05 to identify proteins that significantly differed in at least one group. To consistently analyze *NEX-Trio+/-* and *NEX-Trio-/-* mice independently, unpaired t tests identified differences between groups. The heatmap shows the log<sub>2</sub> fold change compared to the common reference and was clustered using one minus Pearson correlation metric (<https://software.broadinstitute.org/morpheus/>). For phosphoproteomic analyses, kinase-substrate pairs enriched in the dataset were identified using the Phoxtrack tool (Weidner et al., 2014). Phoxtrack scores for kinase-substrate sets were reported and plotted if the p value for their enrichment in either the *NEX-Trio+/-* and *NEX-Trio-/-* groups was less than 0.05. To visualize how phosphorylation site occupancy changed compared to protein levels, we plotted the mean log<sub>2</sub> fold change of the protein level and the phosphosite level for each pair using data from the proteomic and phosphoproteomic analysis.

### DATA AND SOFTWARE AVAILABILITY

For proteomic and phosphoproteomic analyses, the accession number for the original mass spectra reported in this paper is MassIVE (<https://massive.ucsd.edu/ProteoSAFe/static/massive.jsp>): < MSV000083386 >. The data are directly accessible via <ftp://massive.ucsd.edu/MSV000083386>.

Cell Reports, Volume 26

## Supplemental Information

### ***Trio* Haploinsufficiency Causes**

### **Neurodevelopmental Disease-Associated Deficits**

**Sara Marie Katrancha, Juliana E. Shaw, Amy Y. Zhao, Samuel A. Myers, Alexandra R. Cocco, Amanda T. Jeng, Minsheng Zhu, Christopher Pittenger, Charles A. Greer, Steven A. Carr, Xiao Xiao, and Anthony J. Koleske**



## Supplemental Information

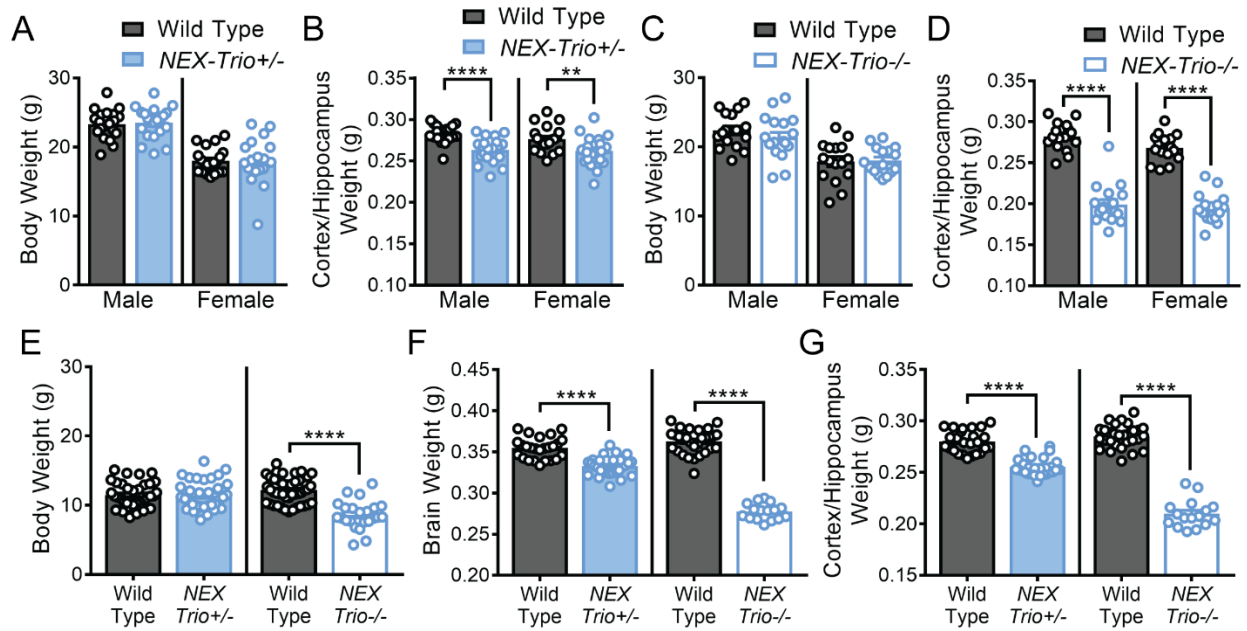

**Figure S1. *NEX-Trio+/-* and *NEX-Trio-/-* mice have similar body weights yet smaller brains than sex-matched littermates. Related to Figure 1.**

(A, C) Body weight does not differ significantly between *NEX-Trio+/-* (A) or *NEX-Trio-/-* (C) mice and WT mice of the same sex at P42.

(B, D) There was a significant reduction in the combined weight of the cortex and hippocampus between *NEX-Trio+/-* (B) or *NEX-Trio-/-* (D) mice and WT mice of the same sex at P42. RM 2-way ANOVA with post-hoc Bonf MC test identified differences (n = 16-21 mice per genotype).

(E) Body weight does not differ significantly between *NEX-Trio+/-* mice and WT mice at P21. Body weight was significantly decreased in *NEX-Trio-/-* mice relative to WT controls at P21.

(F, G) There was a significant reduction in the total brain weight (F) and combined weight of the cortex and hippocampus (G) between *NEX-Trio+/-* or *NEX-Trio-/-* mice and WT mice at P21. Unpaired t-tests identified differences between groups (n = 16-46 mice per genotype).

Data are represented as mean  $\pm$  SEM. (\*\*p < 0.01, \*\*\*\*p < 0.0001)

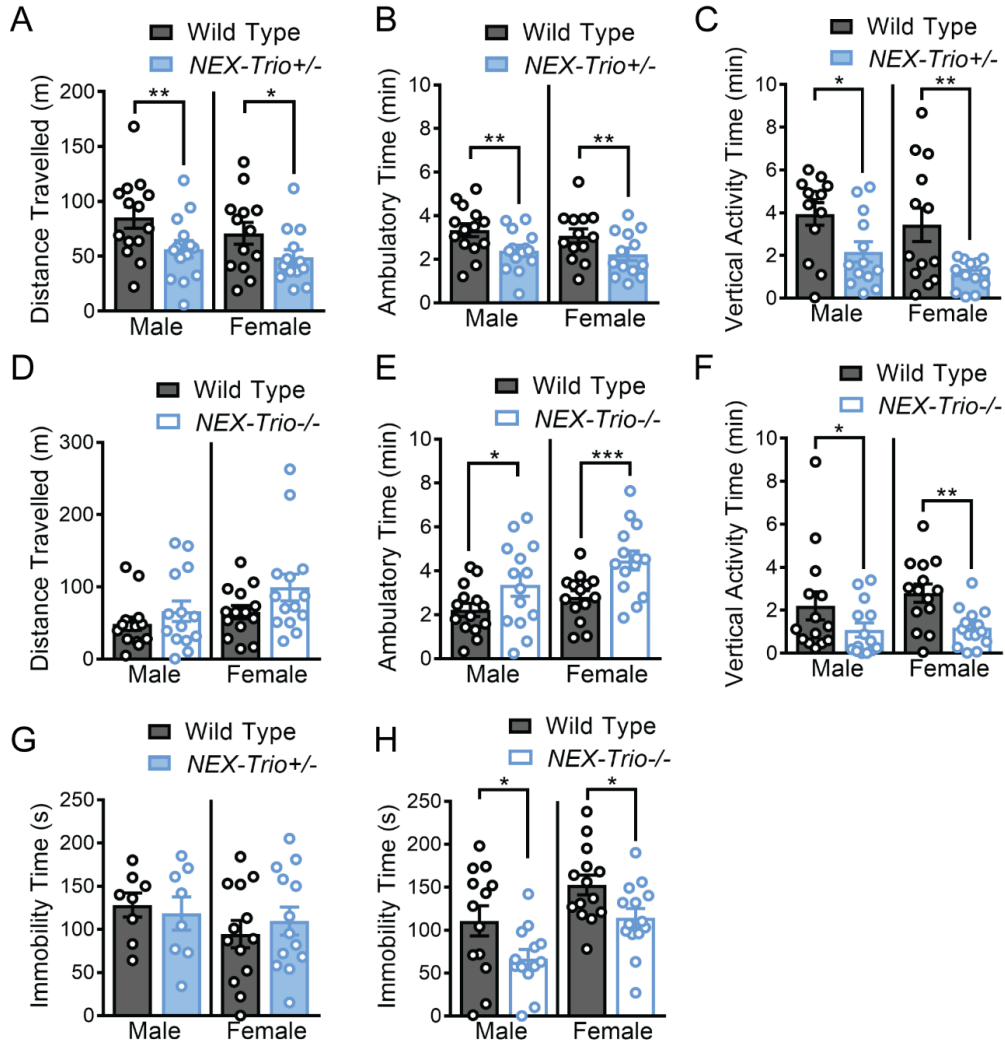

**Figure S2. *NEX-Trio*<sup>+/-</sup> mice show decreased locomotor activity in the open field test (OFT) and no behavioral despair.** Related to Figures 2 and 3.

(A, B, C) During the open field test (OFT), *NEX-Trio*<sup>+/-</sup> mice of both sexes traveled less distance overall (A), spent less time ambulating (B), and spent less time rearing (C) than WT littermates.

(D, E, F) Male and female *NEX-Trio*<sup>-/-</sup> mice showed no difference in distance travelled (D), spent more time ambulating (E), and spent less time rearing (F) relative to WT littermates in the OFT. RM 2-way ANOVA with post-hoc Bonf MC test identified differences (n = 13-14 littermate pairs).

(G) Male and female *NEX-Trio*<sup>+/-</sup> mice showed no change in immobility time during the forced swim test (FST) relative to WT littermates.

(H) Male and female *NEX-Trio*<sup>+/-</sup> mice spent significantly less time immobile during the FST relative to WT littermates. RM 2-way ANOVA with post-hoc Bonf MC test identified differences (n = 8-16 littermate pairs).

Data are represented as mean ± SEM. (\*p<0.05, \*\*p<0.01, \*\*\*p<0.001)

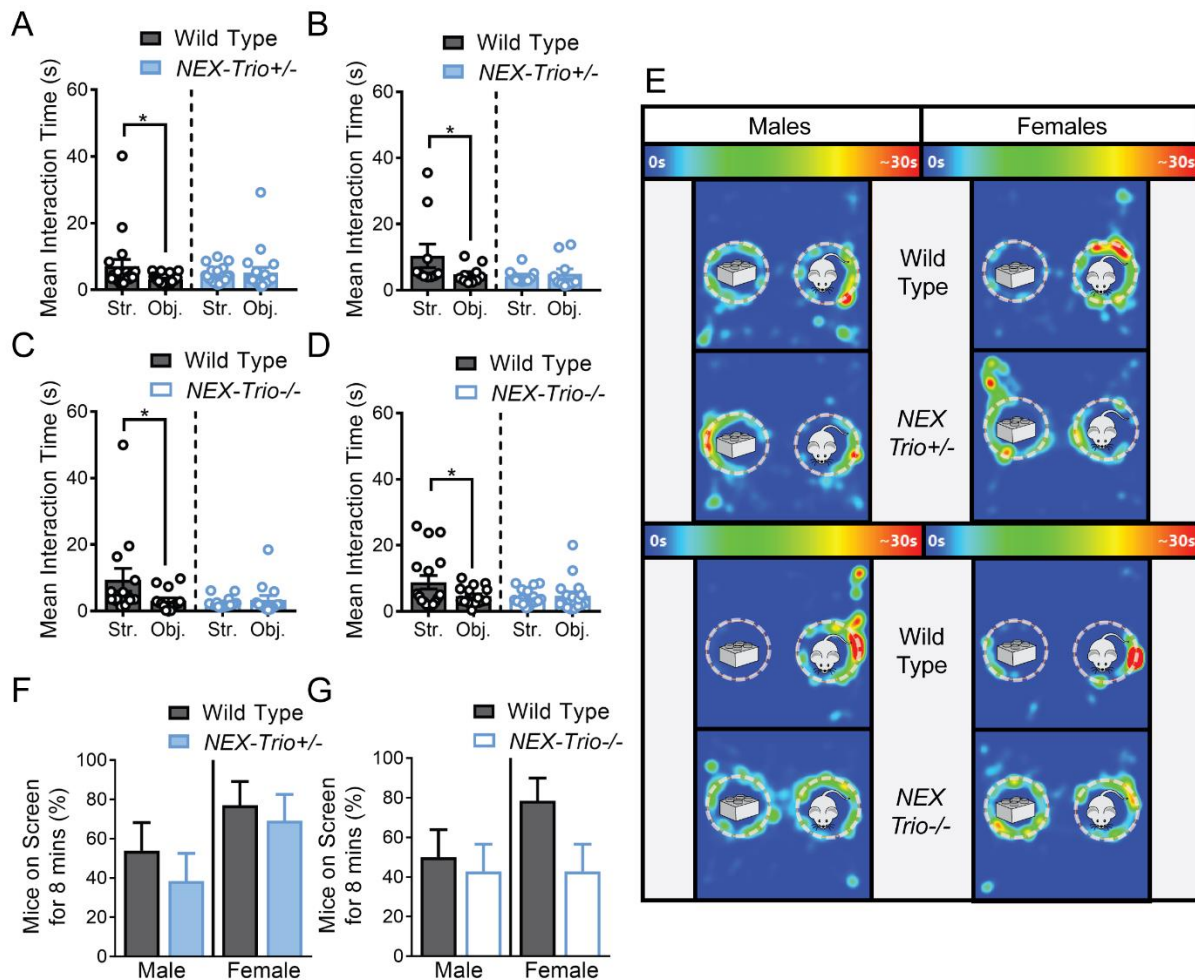

**Figure S3. *NEX-Trio+/-* and *NEX-Trio-/-* mice do not spend more time with the stranger mouse, relative to the object, per visit and show no change in muscle strength. Related to Figures 2 and 3.**

(A, B) Unlike WT mice, male (A) and female (B) *NEX-Trio+/-* mice spent equal time per visit interacting with the stranger mouse (Str.) and the object (Obj.) (mean interaction time).

(C, D) Unlike WT mice, male (C) and female (D) *NEX-Trio-/-* mice spent equal time per visit interacting with the stranger mouse (Str.) and the object (Obj.) (mean interaction time). RM 2-way ANOVA with post-hoc Bonf MC test identified differences (n = 10-18 littermate pairs).

(E) Representative heat maps show the amount of time (0 s in purple; >30 s in red) that the test mouse spent in each location (nonsocial zone, Duplo block; social zone, gray mouse).

(F, G) Male and female *NEX-Trio+/-* mice (F) and *NEX-Trio-/-* mice (G) successfully completed the inverted screen test at the same rate as WT littermates. N-1 Chi Square tests identified differences (n = 12-14 littermate pairs).

Data are represented as mean  $\pm$  SEM. (\*p < 0.05)

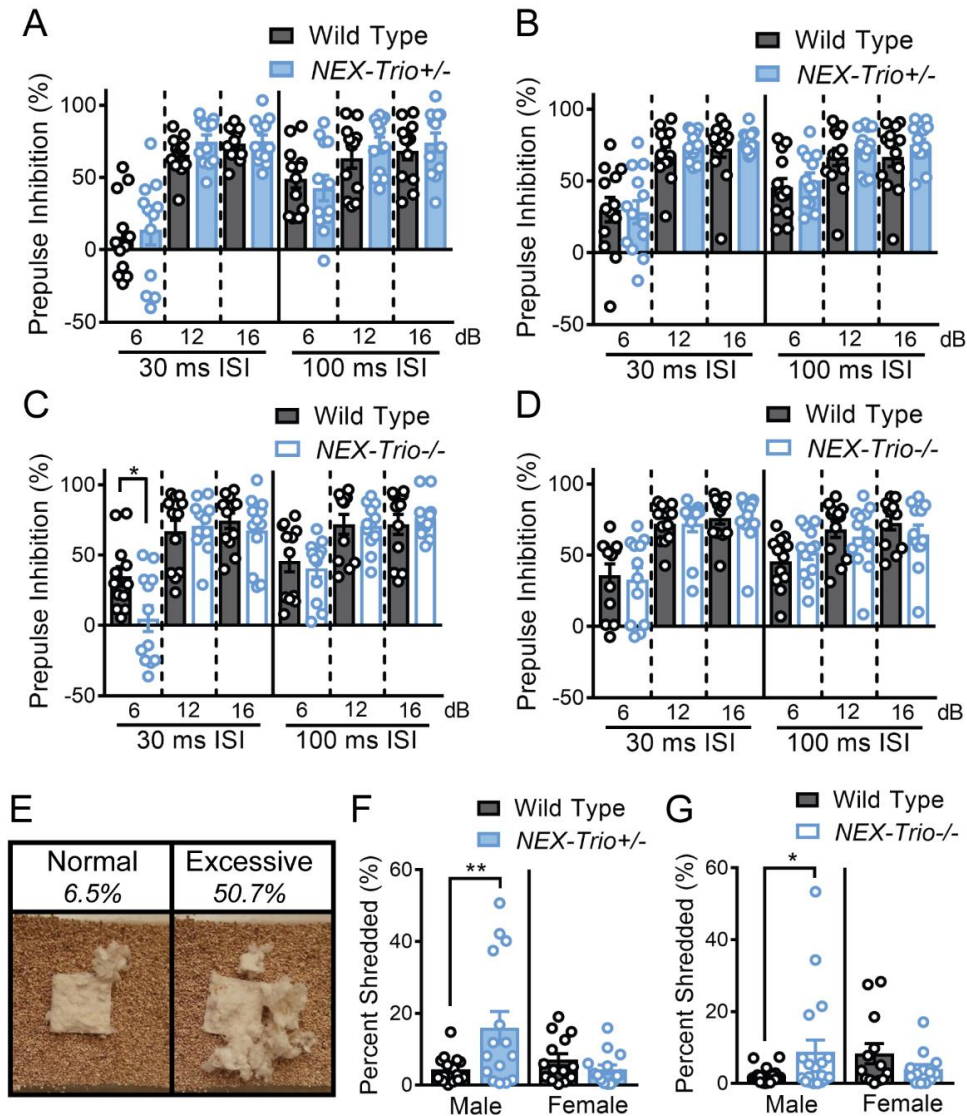

**Figure S4. Some male *NEX-Trio*<sup>+/-</sup> and *NEX-Trio*<sup>-/-</sup> mice have deficits in sensorimotor gating and nestlet shredding.** Related to Figures 2 and 3.

(A, B, C, D) Male *NEX-Trio*<sup>+/-</sup> (A), female *NEX-Trio*<sup>+/-</sup> (B), male *NEX-Trio*<sup>-/-</sup> (C), and female *NEX-Trio*<sup>-/-</sup> (D) mice displayed normal prepulse inhibition of acoustic startle with 30 or 100 ms interstimulus intervals (ISI) for all prepulse intensities (6, 12, and 16 dB), except for male *NEX-Trio*<sup>-/-</sup> mice (C) who showed significantly decreased inhibition at a 6 dB prepulse intensity with 30 ms ISI. RM 2-way ANOVA with post-hoc Bonf MC test identified differences (n = 12-13 littermate pairs).

(E) Representative images of nestlets showing both normal shredding (6.5%) and excessive shredding (50.7%).

(F, G) Male *NEX-Trio*<sup>+/-</sup> (F) and *NEX-Trio*<sup>-/-</sup> (G) mice showed a significant increase in the percentage of nestlet shredded over 30 minutes. Female *NEX-Trio*<sup>+/-</sup> (F) and *NEX-Trio*<sup>-/-</sup> (G) mice shredded the same percentage of nestlet as WT. RM 2-way ANOVA with post-hoc Bonf MC test identified differences (n = 13-19 littermate pairs).

Data are represented as mean ± SEM. (\*p<0.05, \*\*p<0.01)



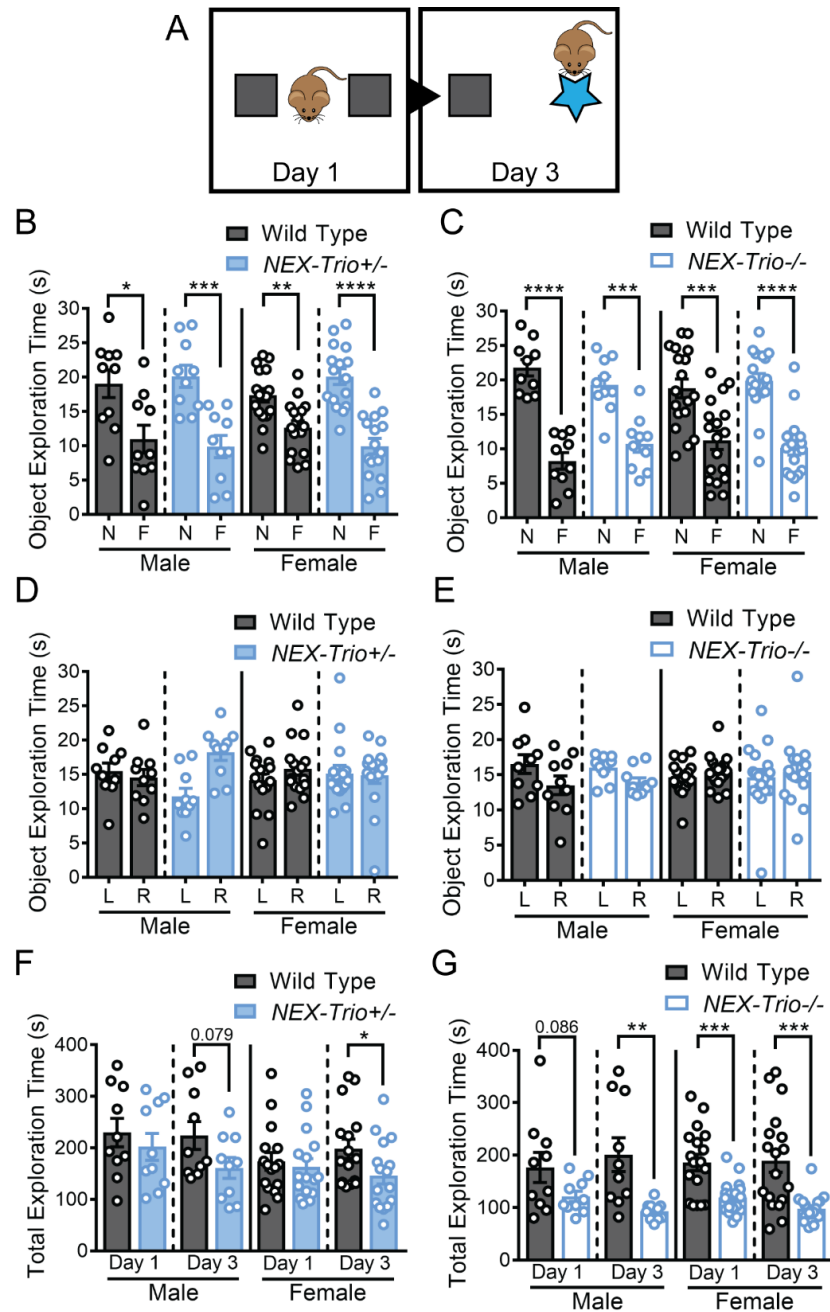

**Figure S5. *NEX-Trio*<sup>+/-</sup> and *NEX-Trio*<sup>-/-</sup> mice showed normal object recognition.** Related to Figures 2 and 3.

(A) The hippocampus-dependent novel object recognition task involved familiarizing the mice with an object on Day 1 and allowing the mouse to discriminate between the familiar object and a novel object on Day 3. WT mice preferred the novel object on Day 3.

(B, C) *NEX-Trio*<sup>+/-</sup> (B) and *NEX-Trio*<sup>-/-</sup> (C) mice of both sexes displayed normal discrimination between novel (N) and familiar (F) objects on Day 3.

(D, E) *NEX-Trio*<sup>+/-</sup> (D) and *NEX-Trio*<sup>-/-</sup> (E) mice of both sexes displayed normal object familiarization between objects on the left (L) and right (R) sides of the cage on Day 1.

(F, G) *NEX-Trio*<sup>+/-</sup> (F) and *NEX-Trio*<sup>-/-</sup> (G) mice accumulated 30 seconds of exploration time in significantly less overall time than WT littermates on day 3 and days 1/3, respectively. A linear regression with post-hoc Bonf MC test identified differences (n = 10-18 littermate pairs).

Data are represented as mean ± SEM. (\*p<0.05, \*\*p<0.01, \*\*\*p<0.001, \*\*\*\*p<0.0001)

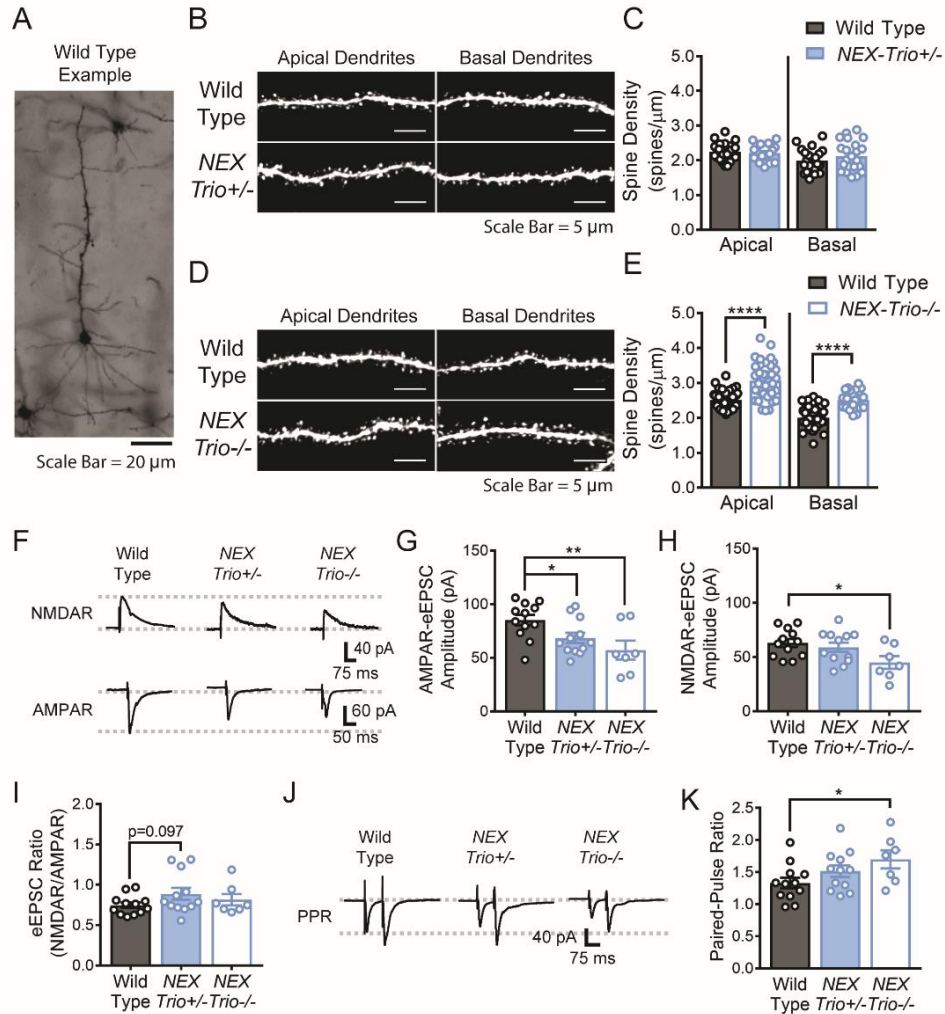

**Figure S6. *NEX-Trio*<sup>-/-</sup> mice have increased dendritic spine density and paired-pulse ratio in the hippocampus. Related to Figures 4, 5, and 6.**

(A) Representative Golgi-stained neuron used for dendritic arbor reconstructions. Scale bar = 20 μm.

(B, D) Representative dendrite segments from the hippocampus (apical and basal dendrites) of *NEX-Trio*<sup>+/-</sup> (B) and *NEX-Trio*<sup>-/-</sup> (D) mice with WT controls. Scale bar = 5 μm.

(C) Dendritic spine density was not significantly changed on the apical or basal dendrites of hippocampal CA1 neurons in *NEX-Trio*<sup>+/-</sup> mice relative to WT controls.

(E) Dendritic spine density was significantly increased on the apical and basal dendrites of hippocampal CA1 neurons in *NEX-Trio*<sup>-/-</sup> mice relative to WT controls. A linear regression with post-hoc Bonf MC test identified differences (n = 18-44 dendrite segments from ≥3 mice per group).

(F) Representative traces of NMDAR- and AMPAR-eEPSCs from *NEX-Trio*<sup>+/-</sup>, *NEX-Trio*<sup>-/-</sup>, and WT hippocampal CA1 neurons.

(G) The amplitudes of AMPAR-eEPSCs were decreased in the hippocampus of *NEX-Trio*<sup>+/-</sup> and *NEX-Trio*<sup>-/-</sup> mice.

(H) The amplitudes of NMDAR-eEPSCs were only decreased in the hippocampus of *NEX-Trio*<sup>-/-</sup> mice.

(I) There is a trend toward increased NMDAR/AMPA eEPSC ratio in the hippocampus of *NEX-Trio*<sup>+/-</sup> mice (p = 0.097) but no change in *NEX-Trio*<sup>-/-</sup> mice.

(J) Representative traces of eEPSCs are shown from *NEX-Trio*<sup>+/-</sup>, *NEX-Trio*<sup>-/-</sup>, and WT hippocampal CA1 neurons evoked by paired-pulse stimulation of hippocampal CA3 Schaffer collateral axons at 75 ms interstimulus intervals.

(K) An increase in the paired-pulse ratio was observed in *NEX-Trio*<sup>-/-</sup> mice, but no change was observed in *NEX-Trio*<sup>+/-</sup> mice. To consistently analyze *NEX-Trio*<sup>+/-</sup> and *NEX-Trio*<sup>-/-</sup> mice independently, unpaired t-tests identified differences between groups (n = 7-12 neurons from ≥3 mice per group).

Data are represented as mean ± SEM. (\*p<0.05, \*\*p<0.01, \*\*\*\*p<0.0001)

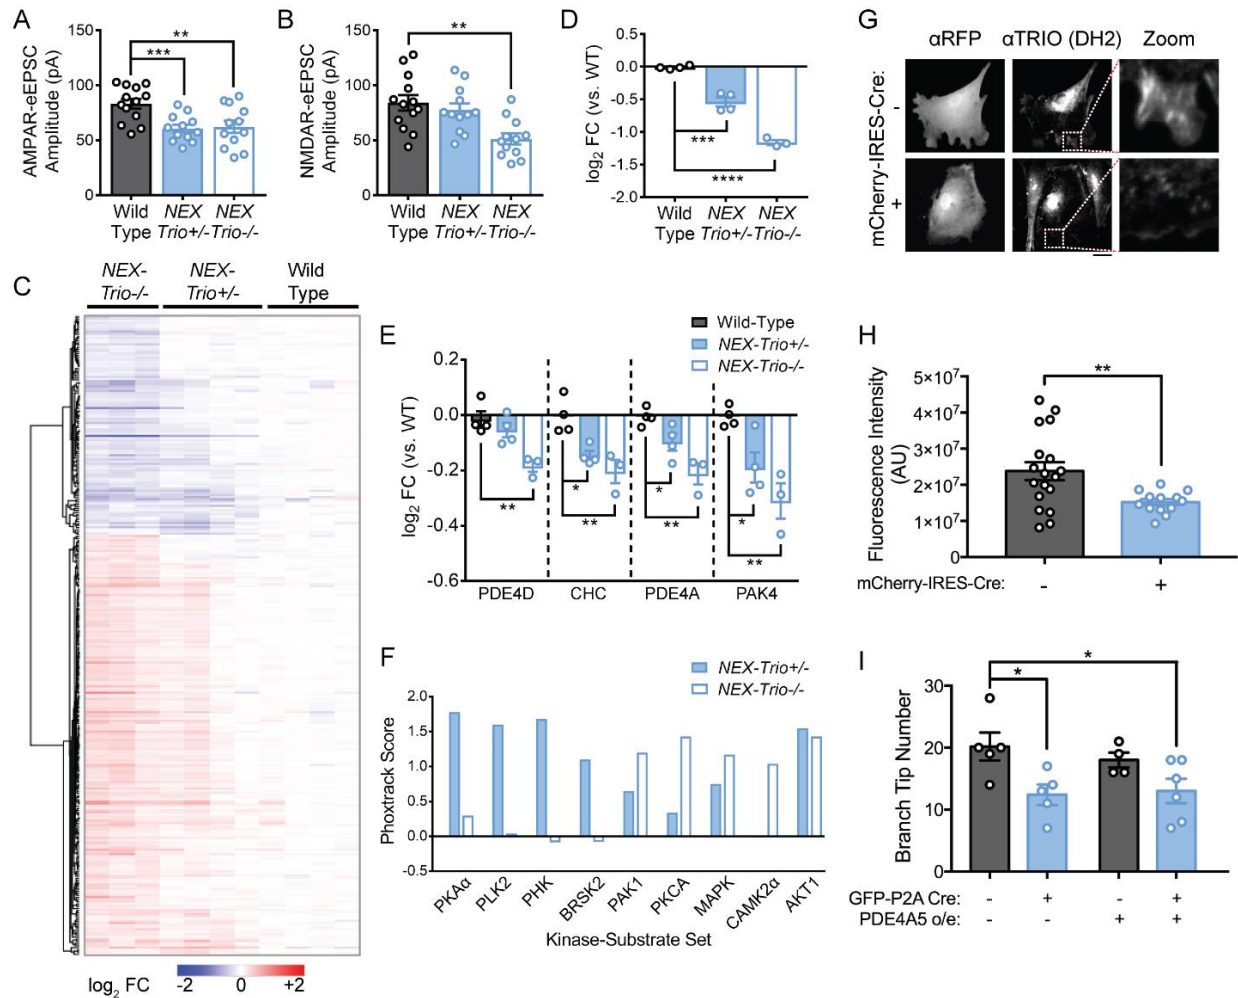

**Figure S7. Proteomic and phosphoproteomic analyses reveal that loss of *Trio* alters protein levels and phosphorylation levels in multiple molecular pathways.** *Related to Figures 6 and 7.*

(A) The amplitudes of AMPAR-eEPSCs were decreased in motor cortex of *NEX-Trio*<sup>+/-</sup> and *NEX-Trio*<sup>-/-</sup> mice.

(B) The amplitudes of NMDAR-eEPSCs were only decreased in motor cortex of *NEX-Trio*<sup>-/-</sup> mice. To consistently analyze *NEX-Trio*<sup>+/-</sup> and *NEX-Trio*<sup>-/-</sup> mice independently, unpaired t-tests identified differences between groups (n = 12-13 neurons from ≥3 mice per group).

(C) Hierarchically clustering of the 294 proteins identified to be differentially abundant (adj. p-value < 0.05) in the motor cortex between WT, *NEX-Trio*<sup>+/-</sup>, and *NEX-Trio*<sup>-/-</sup> mice. Individual replicates are shown.

(D) TRIO log<sub>2</sub> fold change (FC) levels were reduced in *NEX-Trio*<sup>+/-</sup> and *NEX-Trio*<sup>-/-</sup> mice by mass spectrometry.

(E) The log<sub>2</sub> fold change (FC) levels of PDE4D, CHC, PDE4A, and PAK4 were reduced in *NEX-Trio*<sup>+/-</sup> and/or *NEX-Trio*<sup>-/-</sup> mice compared to WT by mass spectrometry. To consistently analyze *NEX-Trio*<sup>+/-</sup> and *NEX-Trio*<sup>-/-</sup> mice independently, unpaired t-tests identified differences between groups (n = 3-4 mice per group).

(F) Phoxtracks enrichment score for all kinase-substrate pair sets that were enriched in *NEX-Trio*<sup>+/-</sup> and/or *NEX-Trio*<sup>-/-</sup> mice by quantitative phosphoproteomics (p-value < 0.05). Positive values indicate increased kinase activity.

(G) Representative immunofluorescence images of *Trio*<sup>flox/flox</sup> fibroblast cells with or without Cre vector. Cells were immunostained 6 days after transfection for RFP to visualize the outline of individually transfected cells and for TRIO using an anti-DH2 antibody to visualize changes in TRIO levels. Scale bar = 10 μm.

(H) Cre expression in *Trio*<sup>flox/flox</sup> fibroblast cells resulted in a 36% reduction in TRIO immunopositive signal 6 days after transfection; some of the remaining signal is likely cross-reactivity with Kalirin. Unpaired t-tests identified differences (n = 13-18 cells per group).

(I) *Cre-Trio*<sup>+/-</sup> cortical neurons showed a reduction in branch tip number 6 days after transfection; this deficit was not rescued by PDE4A5 overexpression. Unpaired t-tests identified differences (n = 5-6 cells per group).

Data are represented as mean ± SEM. (\*p<0.05, \*\*p<0.01, \*\*\*p<0.001, \*\*\*\*p<0.0001)
